# Supplementary material for: Characteristics of funding of clinical trials: cross-sectional survey and proposed guidance
Source: PubMed Central journal article supplement — BMJ Open. 2017 Oct 5;7(10):e015997. doi: 10.1136/bmjopen-2017-015997 (PMC5639984; doi:10.1136/bmjopen-2017-015997), 2017-10-05
Supplement: bmjopen-2017-015997.draft_revisions.pdf [file bmjopen-2017-015997.draft_revisions.pdf]

# BMJ Open

BMJ Open is committed to open peer review. As part of this commitment we make the peer review history of every article we publish publicly available.

When an article is published we post the peer reviewers' comments and the authors' responses online. We also post the versions of the paper that were used during peer review. These are the versions that the peer review comments apply to.

The versions of the paper that follow are the versions that were submitted during the peer review process. They are not the versions of record or the final published versions. They should not be cited or distributed as the published version of this manuscript.

BMJ Open is an open access journal and the full, final, typeset and author-corrected version of record of the manuscript is available on our site with no access controls, subscription charges or pay-per-view fees (<http://bmjopen.bmj.com>).

If you have any questions on BMJ Open's open peer review process please email [info.bmjopen@bmj.com](mailto:info.bmjopen@bmj.com)

# BMJ Open

## Characteristics of funding of clinical trials: a methodological survey and a proposed guidance

|                                 |                                                                                                                                                                                                                                                                                                                                                                                                                                                                                                                                                                                                                                                                                                                                                                                                                                                                                                                                                                         |
|---------------------------------|-------------------------------------------------------------------------------------------------------------------------------------------------------------------------------------------------------------------------------------------------------------------------------------------------------------------------------------------------------------------------------------------------------------------------------------------------------------------------------------------------------------------------------------------------------------------------------------------------------------------------------------------------------------------------------------------------------------------------------------------------------------------------------------------------------------------------------------------------------------------------------------------------------------------------------------------------------------------------|
| Journal:                        | <i>BMJ Open</i>                                                                                                                                                                                                                                                                                                                                                                                                                                                                                                                                                                                                                                                                                                                                                                                                                                                                                                                                                         |
| Manuscript ID                   | bmjopen-2017-015997                                                                                                                                                                                                                                                                                                                                                                                                                                                                                                                                                                                                                                                                                                                                                                                                                                                                                                                                                     |
| Article Type:                   | Research                                                                                                                                                                                                                                                                                                                                                                                                                                                                                                                                                                                                                                                                                                                                                                                                                                                                                                                                                                |
| Date Submitted by the Author:   | 17-Jan-2017                                                                                                                                                                                                                                                                                                                                                                                                                                                                                                                                                                                                                                                                                                                                                                                                                                                                                                                                                             |
| Complete List of Authors:       | Hakoum, Maram; American University of Beirut Medical Center, Clinical Research Institute<br>Jouni, Nahla; American University of Beirut, Faculty of Agriculture and Food Sciences<br>Abou-Jaoude, Eliane; University at Buffalo - The State University of New York, Department of Internal Medicine<br>Hasbani, Divina ; American University of Beirut Faculty of Medicine<br>Abou-Jaoude, Elias; University at Buffalo - The State University of New York<br>Lopes, Luciane; University of Sorocaba, Pharmacology<br>Khalidieh, Mariam; American University of Beirut, Faculty of Sciences<br>Hammoud, Mira; Massachusetts General Hospital, Department of Psychiatry<br>Al-Gibbawi, Mounir; American University of Beirut Faculty of Medicine<br>Anouti, Sirine; American University of Beirut, Department of Epidemiology and Population Health<br>Guyatt, Gordon; McMaster University,<br>Akl, Elie; American University of Beirut, Department of Internal Medicine |
| <b>Primary Subject Heading</b>: | Research methods                                                                                                                                                                                                                                                                                                                                                                                                                                                                                                                                                                                                                                                                                                                                                                                                                                                                                                                                                        |
| Secondary Subject Heading:      | Ethics, Research methods                                                                                                                                                                                                                                                                                                                                                                                                                                                                                                                                                                                                                                                                                                                                                                                                                                                                                                                                                |
| Keywords:                       | funding, role of funder, randomised controlled trial                                                                                                                                                                                                                                                                                                                                                                                                                                                                                                                                                                                                                                                                                                                                                                                                                                                                                                                    |
|                                 |                                                                                                                                                                                                                                                                                                                                                                                                                                                                                                                                                                                                                                                                                                                                                                                                                                                                                                                                                                         |

SCHOLARONE™  
Manuscripts

1  
2  
3 **Characteristics of funding of clinical trials: a methodological survey and a proposed**  
4  
5 **guidance**  
6  
7  
8  
9

10 Maram B. Hakoum, Nahla Jouni, Eliane A. Abou-Jaoude, Divina Justina Hasbani, Elias A.  
11 Abou-Jaoude, Luciane Cruz Lopes, Mariam Khaldieh, Mira Z. Hammoud, Mounir Al-Gibbawi,  
12  
13 Sirine Anouti, Gordon Guyatt, Elie A. Akl  
14  
15  
16  
17  
18  
19

20 Maram B. Hakoum; MD; maram.hakoum@gmail.com <sup>1</sup>  
21

22 Nahla Jouni; BS; nahla.jouni@gmail.com <sup>2</sup>  
23

24 Eliane A. Abou-Jaoude; MD; eaaj22@gmail.com <sup>3</sup>  
25

26 Divina Justina Hasbani; BS; divinahasbani@gmail.com <sup>4</sup>  
27

28 Elias A. Abou-Jaoude; MBA; eliasaj93@gmail.com <sup>5</sup>  
29

30 Luciane Cruz Lopes; PhD; luslopes@terra.com.br <sup>6</sup>  
31

32 Mariam Khaldieh; BS; mek11@mail.aub.edu <sup>7</sup>  
33

34 Mira Zein Hammoud; MD; mirahammoud@gmail.com <sup>8</sup>  
35

36 Mounir Al Gibbawi; BS; mounir.algibbawi@gmail.com <sup>4</sup>  
37

38 Sirine Anouti; MPH; sirine.anouti@gmail.com <sup>9</sup>  
39

40 Gordon Guyatt; MD, MSc.; guyatt@mcmaster.ca <sup>10</sup>  
41

42 Elie A. Akl; MD, MPH, PhD; ea32@aub.edu.lb <sup>1,10,11</sup>  
43  
44  
45  
46  
47  
48  
49

50 <sup>1</sup> Clinical Research Institute, American University of Beirut Medical Center, Beirut, Lebanon  
51

52 <sup>2</sup> Faculty of Agriculture and Food Sciences, American University of Beirut, Beirut, Lebanon  
53  
54  
55  
56  
57  
58  
59  
60

1  
2  
3 <sup>3</sup> Department of Internal Medicine, State University of New York at Buffalo, New York, United  
4  
5 States of America  
6

7  
8 <sup>4</sup> Faculty of Medicine, American University of Beirut, Beirut, Lebanon  
9

10  
11 <sup>5</sup> State University of New York at Buffalo, New York, United States of America  
12

13  
14 <sup>6</sup> Pharmaceutical Science Master Course, University of Sorocaba, São Paulo, Brazil  
15

16  
17 <sup>7</sup> Faculty of Sciences, American University of Beirut, Beirut, Lebanon  
18

19  
20 <sup>8</sup> Department of Psychiatry, Massachusetts General Hospital, Boston, United States of America  
21

22  
23 <sup>9</sup> Department of Epidemiology and Population Health, American University of Beirut, Beirut,  
24  
25 Lebanon  
26

27  
28 <sup>10</sup> Department of Health Research Methods, Evidence, and Impact, McMaster University,  
29  
30 Hamilton, Ontario, Canada  
31

32  
33 <sup>11</sup> Department of Medicine, American University of Beirut Medical Center, Beirut, Lebanon  
34

35  
36  
37  
38  
39  
40  
41  
42  
43  
44  
45  
46  
47  
48  
49  
50  
51  
52  
53  
54  
55  
56  
57  
58  
59  
60

**Corresponding Author:**

Elie A. Akl, MD, MPH, PhD

Department of Internal Medicine

American University of Beirut Medical Center

P.O. Box: 11-0236

Riad-El-Solh Beirut 1107 2020

Beirut – Lebanon

Phone: +961 1 374374

ea32@aub.edu.lb



1  
2  
3 "The Corresponding Author has the right to grant on behalf of all authors and does grant on  
4 behalf of all authors, a worldwide licence to the Publishers and its licensees in perpetuity, in all  
5 forms, formats and media (whether known now or created in the future), to i) publish, reproduce,  
6 distribute, display and store the Contribution, ii) translate the Contribution into other languages,  
7 create adaptations, reprints, include within collections and create summaries, extracts and/or,  
8 abstracts of the Contribution and convert or allow conversion into any format including without  
9 limitation audio, iii) create any other derivative work(s) based in whole or part on the  
10 Contribution, iv) to exploit all subsidiary rights to exploit all subsidiary rights that currently exist  
11 or as may exist in the future in the Contribution, v) the inclusion of electronic links from the  
12 Contribution to third party material where-ever it may be located; and, vi) licence any third party  
13 to do any or all of the above."  
14  
15  
16  
17  
18  
19  
20  
21  
22  
23  
24  
25  
26  
27  
28  
29  
30  
31

32 **Keywords:** funding, role of funder, randomised controlled trial  
33  
34  
35

36 **Word count:** 3,225 words  
37  
38  
39  
40  
41  
42  
43  
44  
45  
46  
47  
48  
49  
50  
51  
52  
53  
54  
55  
56  
57  
58  
59  
60

## ABSTRACT

**Objectives:** The objectives of this study were to describe the characteristics of funding of clinical trials and to develop guidance and an instrument for standardised reporting of funding information.

**Methods:** We addressed the extent to which clinical trials published in 2015 in any of the 119 Core Clinical Journals included a statement on the funding source (e.g., whether a not-for-profit organisation was supported by a private-for-profit), type of funding, amount and role of funder. We used a stepwise approach to develop a guidance and an instrument for standardised reporting of funding information.

**Results:** Of 200 trials, 178 (89%) included a funding statement, of which 171 (96%) reported being funded. Funding statements in the 171 funded trials indicated the source in 100%, amount in 1% and roles of funders in 50%. The most frequent sources were governmental (58%) and private-for-profit (40%). Of 54 funding statements in which the source was not-for-profit organisation, we found evidence of undisclosed support of those organisations from private-for-profit organisation(s) in 26 (48%). The most frequently reported roles of funders in the 171 funded trials related to study design (42%) and data analysis, interpretation, or management (41%). Of 139 RCTs addressing pharmacological or surgical interventions, 29 (21%) reported information on the supplier of the medication or device. The proposed guidance addresses both the funding information that RCTs should report and the reporting process. Attached to the guidance is a fillable PDF document for use as an instrument for standardised reporting of funding information.

**Conclusion:** Although the majority of RCTs report funding, there is considerable variability in the reporting of funding source, amount and roles of funders. A standardised approach to

1  
2  
3 reporting of funding information would address these limitations. Future research should explore  
4  
5 the implications of funding by not-for profit organisations that are supported by for-profit  
6  
7 organisations.  
8  
9

10  
11  
12 **Strengths and limitations of this study:**  
13

- 14  
15 • First methodological survey of a large and representative sample of clinical RCTs to  
16 describe the characteristics of the funding statements in detail.  
17
- 18  
19 • Provides a proposed guidance and instrument for standardised reporting of funding  
20 information.  
21
- 22  
23 • Use of systematic and transparent methods, e.g., duplicate and independent processes in  
24 screening and data collection.  
25
- 26  
27 • Includes trials limited to the clinical field and so our findings may not apply similarly to  
28 other fields such as public health research.  
29  
30  
31  
32  
33  
34  
35  
36  
37  
38  
39  
40  
41  
42  
43  
44  
45  
46  
47  
48  
49  
50  
51  
52  
53  
54  
55  
56  
57  
58  
59  
60

## BACKGROUND

Funding sources often influence the reporting of research findings and the interpretation of results.[1-6] One study found 86% of trial protocols documented an industry partner's right to disapprove or review proposed manuscripts.[7] Reporting of funding in trials may appropriately influence how physicians interpret and use trial findings in clinical practice.[8, 9] The Consolidated Standards of Reporting Trials (CONSORT) checklist recognises this issue in its inclusion of a section on reporting of funding.[10, 11]

Reports in the lay media have documented how for-profit organisations support research through not-for-profit organisations.[12, 13] In one example, The Independent recently highlighted a systematic review suggesting that the consumption of low-energy sweeteners in place of sugar reduces energy intake and body weight.[14] The review authors list the International Life Sciences Institute as the study funder. While the Institute describes itself as “a nonprofit, worldwide organisation whose mission is to provide science that improves human health”, it receives funding primarily from companies such as the Coca-Cola Company, PepsiCo and Nestlé.[15] Other examples of not-for-profit organisations funded by industry and supporting research are the Sugar Association, Inc. [16, 17] and the now defunct Global Energy Balance Network.[18]

At least 22 studies have assessed reporting of funding in clinical trials (table 1), all of which focused on trials published in specific clinical areas or journals. Most (14, 64%) reported only on funded trials or did not differentiate between non-funded trials and those that do not report on funding and 17 (77%) did not always distinguish trials with no funding from those funded by the

1  
2  
3  
4  
5  
6  
7  
8  
9  
10  
11  
12  
13  
14  
15  
16  
17  
18  
19  
20  
21  
22  
23  
24  
25  
26  
27  
28  
29  
30  
31  
32  
33  
34  
35  
36  
37  
38  
39  
40  
41  
42  
43  
44  
45  
46  
47  
48  
49  
50  
51  
52  
53  
54  
55  
56  
57  
58  
59  
60

government or by not-for-profit sources. Moreover, these studies seldom assessed reporting on the role of funder (4), provision of supplies (2), and the amount of funding (0).

For peer review only

**Table 1:** Comparative chart including 23 related methodological surveys of reporting of funding information in trials

| Survey                | Eligibility criteria                                                            | Number of trials | Year of trial publication | Characteristics of funding statement assessed in the survey                                                                               | Main findings                                                                                                                                                                              |
|-----------------------|---------------------------------------------------------------------------------|------------------|---------------------------|-------------------------------------------------------------------------------------------------------------------------------------------|--------------------------------------------------------------------------------------------------------------------------------------------------------------------------------------------|
| Als-Nielsen 2003 [19] | RCTs included in eligible meta-analyses in Cochrane reviews                     | 370              | 1971 - 2000               | - Source of funding                                                                                                                       | Funding was not reported in 29%. 39% were funded by for-profit organisations.                                                                                                              |
| Etter 2007 [20]       | RCTs on nicotine replacement therapy in Cochrane review                         | 90               | 1979 - 2003               | - Source of funding                                                                                                                       | 54% received pharmaceutical company support. 46% showed no evidence of pharmaceutical company support.                                                                                     |
| Mugambi 2013 [5]      | RCTs on infant formula supplementation of symbiotics, probiotics, or prebiotics | 67               | 1980 - 2012               | - Source of funding                                                                                                                       | 60% were funded by food industry. 24% did not specify their source of funding.                                                                                                             |
| Rochon 1994 [21]      | Manufacturer-associated RCTs of NSAIDs listed in MEDLINE                        | 52               | 1987 - 1990               | - Grant support<br>- Pharmaceutical authorship<br>- Provision of supplies<br>- Published in a pharmaceutical sponsored journal supplement | 19% reported grant support. 36.5% reported pharmaceutical authorship. 13.5% reported that manufacturer supplied drug. 31% were published in a pharmaceutical sponsored journal supplement. |
| Momeni 2008 [22]      | Trials published in 4 major plastic surgery journals                            | 346              | 1990 - 2005               | - Source of funding                                                                                                                       | 20% reported on financial support, of which 60% were supported by industrial sponsorship.                                                                                                  |
| Yaphe 2001 [23]       | RCTs of drugs or food products published in 5 medical journals                  | 314              | 1992 - 1994               | - Source of funding<br>- Pharmaceutical authorship                                                                                        | 68% received pharmaceutical industry support. 33% received support as manpower                                                                                                             |

|                         |                                                                               |     |                     |                                                       |                                                                                                                                                                             |
|-------------------------|-------------------------------------------------------------------------------|-----|---------------------|-------------------------------------------------------|-----------------------------------------------------------------------------------------------------------------------------------------------------------------------------|
|                         |                                                                               |     |                     | - Provision of supplies                               | (authorship or statistical help).<br>21% received support as supply of drugs.                                                                                               |
| Peppercorn<br>2007 [24] | Breast cancer clinical trials<br>published in 10 medical<br>journals          | 140 | 1993, 1998,<br>2003 | - Source of funding<br>- Pharmaceutical<br>authorship | 48% were categorised as pharmaceutical<br>studies.<br>26% reported pharmaceutical industry<br>authorship.                                                                   |
| Bero<br>2007 [25]       | Reports of RCTs comparing<br>statin drugs                                     | 192 | 1995 - 2005         | - Source of funding<br>- Role of funder               | 39% had no disclosure or no funding<br>(Table 1).<br>49% disclosed funding from industry, of<br>which 21% disclosed the role of the<br>sponsor.                             |
| Djulgovic<br>2000 [26]  | RCTs for multiple myeloma                                                     | 130 | 1996 - 1998         | - Source of funding                                   | 26% reported funding solely or in part by<br>commercial organisations.                                                                                                      |
| Clifford<br>2002 [27]   | RCTs published in 5 high<br>impact factor general<br>medical journals         | 100 | 1999 - 2000         | - Source of funding                                   | 94% were funded, of which 66% were<br>funded in whole or in part by industry.<br>6% did not disclose their source of<br>funding.                                            |
| Bhandari<br>2004 [28]   | RCTs published in 8<br>surgical and 5 medical<br>journals                     | 332 | 1999 - 2001         | - Source of funding                                   | 44% had no reported funding.<br>37% reported funding by industry.                                                                                                           |
| Tuech<br>2005 [29]      | Phase III cancer RCTs<br>published in 12 journals                             | 655 | 1999 - 2003         | - Source of funding<br>- Role of funder               | 35% were industry-sponsored, of which<br>18% reported the role of the study<br>sponsor.<br>21% did not disclose funding and only 1<br>trial disclosed no financial support. |
| Shah<br>2005 [30]       | Articles published in the<br>Spine journal                                    | 34  | 2000 - 2003         | - Source of funding                                   | 23% were industry funded.                                                                                                                                                   |
| Tungaraza<br>2007 [31]  | Original papers on<br>psychiatric drug treatment<br>published in two journals | 132 | 2000 - 2004         | - Source of funding<br>- Pharmaceutical<br>authorship | 85% were industry-funded.<br>40% were industry-authored studies.                                                                                                            |

|                         |                                                                                                                                                  |     |                            |                                         |                                                                                                                                                                |
|-------------------------|--------------------------------------------------------------------------------------------------------------------------------------------------|-----|----------------------------|-----------------------------------------|----------------------------------------------------------------------------------------------------------------------------------------------------------------|
| Ridker<br>2006 [32]     | Cardiovascular medicine<br>RCTs published in 3<br>medical journals                                                                               | 349 | 2000 - 2005                | - Source of funding                     | 31% were financed by not-for-profit<br>organisations, 44% by for-profit<br>manufacturers, and 19% by both.<br>6% noted no source of funding.                   |
| Voineskos<br>2016 [33]  | Surgical RCTs                                                                                                                                    | 173 | 2000 - 2013                | - Source of funding                     | 58% did not acknowledge a source of<br>funding.<br>14% reported funding from for-profit<br>sources.<br>10% explicitly reported 'no funding<br>received'.       |
| Montgomery<br>2004 [34] | RCTs on second generation<br>antipsychotics for the<br>management of<br>schizophrenia                                                            | 86  | 2002                       | - Source of funding                     | 84% were industry-funded.<br>16% were non-industry-funded.                                                                                                     |
| Perlis<br>2005 [35]     | RCTs published in one of<br>the four dermatology<br>journals with the highest<br>science citation impact<br>factor scores and total<br>citations | 179 | 2002                       | - Source of funding                     | 57% reported receiving at least some<br>industry support.<br>26% had no information about funding.                                                             |
| Khan<br>2012 [36]       | RCTs of drug therapy for<br>rheumatoid arthritis                                                                                                 | 103 | 2002 – 2003<br>2006 - 2007 | - Source of funding                     | 62% had complete or partial industry<br>funding.<br>19% had an unspecified funding source.                                                                     |
| Hodgson<br>2014 [37]    | RCTs in chronic wound care                                                                                                                       | 167 | 2004 - 2011                | - Source of funding                     | 35% were reported as having been<br>commercially funded.<br>26% either did not report the source of<br>funding or the status of funding source<br>was unclear. |
| Bridoux<br>2014 [38]    | Surgical trials published in<br>10 surgery journals with<br>impact factor >2                                                                     | 657 | 2005 - 2010                | - Source of funding<br>- Role of funder | 47% disclosed funding.<br>Of those, 39% reported funding from<br>industry or mixed funding, of which 35%<br>reported the role of study sponsor.                |



1  
2  
3  
4  
5  
6  
7  
8  
9  
10  
11  
12  
13  
14  
15  
16  
17  
18  
19  
20  
21  
22  
23  
24  
25  
26  
27  
28  
29  
30  
31  
32  
33  
34  
35  
36  
37  
38  
39  
40  
41  
42  
43  
44  
45  
46  
47  
48  
49

|                 |                                                                                                       |     |             |                                                                                |                                                                                                                                                                                                                                                                                                                                                                                                                          |
|-----------------|-------------------------------------------------------------------------------------------------------|-----|-------------|--------------------------------------------------------------------------------|--------------------------------------------------------------------------------------------------------------------------------------------------------------------------------------------------------------------------------------------------------------------------------------------------------------------------------------------------------------------------------------------------------------------------|
| Lundh 2012 [39] | RCTs published in The Lancet and fully funded by a drug or device company                             | 69  | 2008 - 2009 | - Role of funder                                                               | Sponsor had a role in:<br>Review and verification of information (71%)<br>Entry of data into the study database (75%)<br>Data storage (64%)<br>Data analysis (58%)<br>Coordinating writing of the manuscript (35%)<br>Medical writing assistance (54%)<br>Protocol writing (99%)<br>Co-authorship (81%)<br>Publication of results through co-authorship or approval/review of the paper (93%)                            |
| Current survey  | RCTs published in any of the 119 Core Clinical Journals, not restricted to a specific clinical domain | 200 | 2015        | - Source of funding<br>- Amount<br>- Provision of supplies<br>- Role of funder | 89% included a funding statement, of which 96% reported being funded.<br><br>Of the funded trials (N=171):<br>- 100% specified the source;<br>- 40% received funding from private-for-profit sources;<br>- 1% reported the amount of funding;<br>- 21% of pharmacological/surgical trials (N=139) reported information on supplies.<br>- 50% reported on the roles of funders (26% as involved and 24% as not involved). |

RCT: randomised controlled trial

1  
2  
3 The current literature lacks a detailed, current characterisation of funding of a representative  
4 sample of trials. The objectives of this study were to provide such a characterisation and to  
5 develop guidance for standardised reporting of funding information and a form that would aid  
6 such reporting.  
7  
8  
9  
10  
11  
12

## 13 14 15 **METHODS**

### 16 17 **Design overview and definitions**

18  
19 We followed systematic review methodology to conduct a methodological survey of published  
20 randomised controlled trials (RCTs). We define funding as any support (e.g. monetary support,  
21 provision of supplies, assistance in manuscript writing). We considered as funding statement any  
22 text in the trial report providing any information regarding the funding of the trial, including a  
23 statement of no funding. A funding statement could indicate more than one funding contribution.  
24  
25  
26  
27  
28  
29  
30  
31  
32  
33

34 We used a stepwise approach for developing the proposed guidance for standardised reporting of  
35 funding information. Our starting point consisted of a simple classification we had used in a  
36 number of our previous studies (governmental, private not-for-profit, and private-for-profit).[40,  
37 41] which we modified based on a review of relevant literature.[5, 36, 38] and of journals'  
38 policies on reporting of funding information (unpublished data from another methodological  
39 survey).[42] We further refined the classification (table 2) through an iterative process of  
40 discussion and revisions based on funding statements reported in this sample of RCTs, as well as  
41 in a sample of systematic reviews.[43] That process included both in person discussions and  
42 email feedback among the authors of this article. We used Adobe® Acrobat XI® software to  
43  
44  
45  
46  
47  
48  
49  
50  
51  
52  
53  
54  
55  
56  
57  
58  
59  
60

1  
2  
3  
4  
5  
6  
7  
8  
9  
10  
11  
12  
13  
14  
15  
16  
17  
18  
19  
20  
21  
22  
23  
24  
25  
26  
27  
28  
29  
30  
31  
32  
33  
34  
35  
36  
37  
38  
39  
40  
41  
42  
43  
44  
45  
46  
47  
48  
49  
50  
51  
52  
53  
54  
55  
56  
57  
58  
59  
60

develop a fillable PDF document for use as an instrument for standardised reporting of funding information.

For peer review only

**Table 2:** Types of sources of funding

|                                                                                                               |                                                                                                                                                                                                   |
|---------------------------------------------------------------------------------------------------------------|---------------------------------------------------------------------------------------------------------------------------------------------------------------------------------------------------|
| Internal funding                                                                                              | author is the “Chair of –”; intramural fund; provided by institution, university, hospital affiliation, academic affiliation                                                                      |
| External funding:                                                                                             |                                                                                                                                                                                                   |
| 1. <i>Government</i>                                                                                          | national, regional (province, county), or governmental body, organisation, or association                                                                                                         |
| 2. <i>Private-for-profit</i>                                                                                  | drug/device industry or private company                                                                                                                                                           |
| 3. <i>Private not-for-profit with evidence of support by private-for-profit that is a health industry</i>     | foundation or organisation that receives funding from a drug industry, as stated in information provided online                                                                                   |
| 4. <i>Private not-for-profit with evidence of support by private-for-profit that is not a health industry</i> | foundation or philanthropy that was founded by billionaires or that receives funding from a private industry that is not known to produce drugs/devices, as stated in information provided online |
| 5. <i>Private not-for-profit with no evidence of support by private-for-profit</i>                            | foundation or organisation that is not known to receive funding from any governmental or private company, as stated in information provided online                                                |

### Eligibility criteria

We included reports of studies described as RCTs enrolling humans and published in English in any one of the 119 Core Clinical Journals during 2015. We excluded non-randomised trials, trials addressing basic sciences topics and non-clinical interventions, and research letters. We included RCTs with cross-over designs and secondary reports of trials (i.e. follow-up study; post-hoc analysis; interim analysis; pre-specified analysis or secondary outcomes or sub-study of a trial).

### Search strategy

We searched using Ovid Medline in September 2015 for the 119 Core Clinical Journals (Abridged Index Medicus (AIM)). We applied the search filter obtained from the Cochrane handbook to identify RCTs. See appendix 1 for the detailed search strategy.

### Selection process

We used an online sequence generator ([www.random.org/sequences](http://www.random.org/sequences)) to select a random sample from the citations captured. Following calibration exercises, three reviewers worked in teams of two to screen titles and abstracts in duplicate and independently. We obtained the full-texts of citations judged as potentially eligible by either reviewer.

The two teams of reviewers screened full-texts in duplicate and independently. They resolved disagreements by discussion, or with the help of a third reviewer as needed. A PRISMA study flow diagram [44] presents the results of the selection process (figure 1).

### Data abstraction process

We developed a standardised data abstraction form along with specific instructions. After pilot testing the form, we embedded it electronically into Research Electronic Data Capture (REDCap), a secure web-based application designed to support data capture for research studies.[45] After completing calibration exercises, nine authors divided into teams of two abstracted data in duplicate and independently. Each team compared results and resolved disagreements through discussion with the help of a third review author as needed.

### Data abstracted

We abstracted the following characteristics of the RCTs:

- Number of trialists;
- Whether it was the first full-text report of the trial findings;
- Classification of the income level of the country in which the first author's institution is located (according to the July 2015 World Bank list of economies);
- Type of intervention and type of control;
- Number of randomised participants;
- Level of risk of bias associated with allocation concealment;
- Whether authors reported conflicts of interest;
- Whether the report included a funding statement.

We then focused on trials that included a funding statement. We abstracted the following characteristics of the statement:

- Whether it reported funding versus no funding;

- The type of source(s) of funding. Table 2 presents the main types of sources of funding along with illustrative examples. As needed, we performed an online search to accurately assign the type of the source of funding. When a source of funding was identified as a not-for-profit organisation, we searched the organisation's website for any information on partnership with or support from a for-profit organisation;
- Amount of funding;
- Whether it differentiated source of funding from sponsor;
- Whether information was reported on supplies in trials on pharmacological or surgical interventions (i.e., drugs, devices, equipment, samples, or placebos) and whether the supplier is a funding source.

Finally, and in trials that reported being funded, we assessed whether the role of funder was explicitly reported for any funder as involved or not involved in the process of the research study.

### **Data analysis**

Our sample size allows for a narrow 95% confidence interval (+/- 5%) around proportions of studies reporting sources of funding. We assessed agreement between reviewers for inclusion of RCTs at the full-text screening stage using chance-corrected agreement (kappa statistic). We conducted descriptive analyses of the general characteristics of the RCT, as well as the characteristics of the funding statement. We present summary data for categorical variables as frequencies and percentages and for continuous variables as median and interquartile range (IQR). All calculations used SPSS, version 21.0 for Windows (SPSS INC., Chicago, IL, USA).

1  
2  
3  
4  
5  
6 Candidate independent variables for multiple logistic regression analyses to assess the predictors  
7  
8 of reported funding and the role of funder included characteristics of the RCT and variables  
9  
10 related to Journal policy for reporting funding (i.e., journal requirement for reporting of funding;  
11  
12 journal requirement for reporting on the role of funder). For variables related to journal policy  
13  
14 for reporting funding information, we used unpublished data we had collected for another  
15  
16 methodological survey.[42]  
17  
18  
19  
20  
21

## 22 **RESULTS**

23  
24 Figure 1 presents the study flow diagram. Agreement proved near perfect ( $\kappa=0.82$ ) at the  
25  
26 full-text screening stage.  
27  
28  
29  
30  
31

### 32 **Characteristics of the randomised controlled trial**

33  
34 The first authors of most trials (90%) had affiliations in high-income countries and almost half  
35  
36 (49%) assessed pharmacological interventions (table 3). Most trials (94%) reported on conflicts  
37  
38 of interest and 54% disclosed presence of conflicts of interest. Almost all (178, 89%) included a  
39  
40 funding statement.  
41  
42  
43  
44  
45  
46  
47  
48  
49  
50  
51  
52  
53  
54  
55  
56  
57  
58  
59  
60



**Table 3:** General characteristics of the included randomised controlled trials (N=200)

|                                                                                                       | Overall<br>N (%) § |
|-------------------------------------------------------------------------------------------------------|--------------------|
| Number of trialists; median (IQR)                                                                     | 9 (6 – 14)         |
| Paper is the first full-text report of the trial findings                                             | 171 (86%)          |
| Classification of the income level of the country in which the first author's institution is located: |                    |
| <i>High-income</i>                                                                                    | 179 (90%)          |
| <i>Upper middle-income</i>                                                                            | 15 (8%)            |
| <i>Lower middle-income</i>                                                                            | 4 (2%)             |
| <i>Low-income</i>                                                                                     | 2 (1%)             |
| Type of intervention                                                                                  |                    |
| <i>Pharmacological</i>                                                                                | 97 (49%)           |
| <i>Surgical/invasive procedure</i>                                                                    | 42 (21%)           |
| <i>Non-invasive procedure</i>                                                                         | 11 (6%)            |
| <i>Lifestyle intervention</i>                                                                         | 15 (8%)            |
| <i>Screening/diagnostic intervention</i>                                                              | 9 (5%)             |
| <i>Psycho-therapeutic intervention</i>                                                                | 4 (2%)             |
| <i>Rehabilitation</i>                                                                                 | 6 (3%)             |
| <i>Other</i>                                                                                          | 16 (8%)            |
| Type of control                                                                                       |                    |
| <i>Active control (as opposed to non-active)</i>                                                      | 82 (41%)           |

|                                                              |                |
|--------------------------------------------------------------|----------------|
| Number of randomised participants; median (IQR)              | 160 (60 – 485) |
| Level of risk of bias associated with allocation concealment |                |
| <i>High risk</i>                                             | 4 (2%)         |
| <i>Low risk</i>                                              | 59 (30%)       |
| <i>Unclear</i>                                               | 137 (69%)      |
| Paper with authors reporting conflicts of interest           |                |
| <i>Not reported</i>                                          | 12 (6%)        |
| <i>Reported with no conflicts of interest disclosed</i>      | 80 (40%)       |
| <i>Reported with conflicts of interest disclosed</i>         | 108 (54%)      |
| Paper included a funding statement                           |                |
| <i>Included (as opposed to not included)</i>                 | 178 (89%)      |

§ For continuous variables, numbers refer to median (IQR); indicated in the relevant row.

### Characteristics of the reported funding

Table 4 presents the characteristics of the reported funding of the 178 trials with a funding statement, of which 171 (96%) reported being funded. The median number (IQR) of sources of funding per trial was 1 (1-3), with a range of 1 to 12. The top most frequent sources of funding were governmental (58%) and private-for-profit (40%). Of the 54 funding contribution statements in which the source was identified as being a not-for-profit organisation, we found evidence of support of those organisations from private-for-profit organisation(s) in 29 (54%), of which 26 (48%) did not disclose this support in the study report. Twenty-one trials (12%) reported funding from private-for-profit in addition to another source. Two trials reported the amount of funding received. Of the 139 RCTs assessing pharmacological or surgical interventions, 29 (21%) reported information on the supplier of the medication or device.

**Table 4:** Characteristics of the funding statements included in the randomised controlled trials  
(N=178 trials)

|                                                                                                            | Overall<br>N (%) |
|------------------------------------------------------------------------------------------------------------|------------------|
| Funding statement reported being:                                                                          |                  |
| <i>Funded (as opposed to not funded)</i>                                                                   | 171 (96%)        |
| Source of funding (when reported as funded; N=171)                                                         |                  |
| <i>Internally funded</i>                                                                                   | 26 (15%)         |
| <i>Externally funded by:</i>                                                                               |                  |
| <i>Government</i>                                                                                          | 99 (58%)         |
| <i>Private-for-profit</i>                                                                                  | 68 (40%)         |
| <i>Private not-for-profit with evidence of support by private-for-profit that is a health industry</i>     | 14 (8%)          |
| <i>Private not-for-profit with evidence of support by private-for-profit that is not a health industry</i> | 15 (9%)          |
| <i>Private not-for-profit with no evidence of support by private-for-profit</i>                            | 25 (15%)         |
| Statement included amount of funding received                                                              | 2 (1%)           |
| Paper reported to be sponsored by a source different than the source of funding/support                    | 2 (1%)           |
| Paper reported information on supplies (i.e., drugs, devices, equipment, samples, or placebos) \$          |                  |

1  
2  
3  
4  
5  
6  
7  
8  
9  
10  
11  
12  
13  
14  
15  
16  
17  
18  
19  
20  
21  
22  
23  
24  
25  
26  
27  
28  
29  
30  
31  
32  
33  
34  
35  
36  
37  
38  
39  
40  
41  
42  
43  
44  
45  
46  
47  
48  
49  
50  
51  
52  
53  
54  
55  
56  
57  
58  
59  
60

|                                                            |           |
|------------------------------------------------------------|-----------|
| <i>Yes, supplied by manufacturer same as funder</i>        | 12 (9%)   |
| <i>Yes, supplied by manufacturer different than funder</i> | 17 (12%)  |
| <i>Not reported</i>                                        | 110 (79%) |

\$ Calculated using the number of trials on pharmacological interventions and surgical/invasive procedures (N=139).

For peer review only

### The reported roles of funders

Table 5 presents the reported roles of funders in the 171 trials that reported being funded. 85 trials (50%) indicated the role of funders and provided descriptions of 22 different roles. The most frequent roles indicated in these 85 trials were participation in the design of the study (42%), data collection (27%), data analysis, interpretation, or management (41%), manuscript preparation (32%), decision to submit the manuscript (15%) and conduct of the study (15%).

**Table 5:** Reporting on the roles of funders in the randomised controlled trials that reported being funded (N=171)

|                                                           | Reported role as:     |                   | Did not report role |
|-----------------------------------------------------------|-----------------------|-------------------|---------------------|
|                                                           | Not involved<br>N (%) | Involved<br>N (%) |                     |
| Any role of the below                                     | 41 (24%)              | 44 (26%)          | 86 (50%)            |
| Protocol/design of the study                              | 41 (24%)              | 30 (18%)          | 100 (58%)           |
| Data collection                                           | 31 (18%)              | 16 (9%)           | 124 (73%)           |
| Verifying data accuracy/ fact checking                    | 0 (0%)                | 3 (2%)            | 168 (98%)           |
| Outcome adjudication                                      | 0 (0%)                | 1 (1%)            | 170 (99%)           |
| Data analysis/ interpretation/ management                 | 40 (23%)              | 31 (19%)          | 100 (58%)           |
| Funded a medical writer                                   | 1 (1%)                | 19 (11%)          | 151 (88%)           |
| Preparation of the manuscript                             | 34 (20%)              | 20 (12%)          | 117 (68%)           |
| Review of the manuscript                                  | 17 (10%)              | 7 (4%)            | 147 (86%)           |
| Approval of the manuscript                                | 17 (10%)              | 8 (5%)            | 146 (85%)           |
| Decision to submit the manuscript                         | 18 (10%)              | 6 (4%)            | 147 (86%)           |
| Appointed an independent data and safety monitoring board | 0 (0%)                | 1 (1%)            | 170 (99%)           |
| Auditing of study conduct                                 | 0 (0%)                | 3 (2%)            | 168 (98%)           |
| Management                                                | 0 (0%)                | 3 (2%)            | 168 (98%)           |
| Team assembly                                             | 0 (0%)                | 2 (1%)            | 169 (99%)           |
| Conduct of study                                          | 13 (8%)               | 12 (7%)           | 146 (85%)           |

|                               |        |        |           |
|-------------------------------|--------|--------|-----------|
| Generated randomisation list  | 0 (0%) | 3 (2%) | 168 (98%) |
| Enrollment of participants    | 0 (0%) | 1 (1%) | 170 (99%) |
| Logistical support            | 0 (0%) | 3 (2%) | 168 (98%) |
| Holding study data            | 0 (0%) | 1 (1%) | 170 (99%) |
| Study oversight               | 0 (0%) | 2 (1%) | 169 (99%) |
| Steering committee            | 0 (0%) | 1 (1%) | 170 (99%) |
| Measurement of study variable | 0 (0%) | 5 (3%) | 166 (97%) |



## Results of the regression analyses

Appendix 2 presents the details of the multiple logistic regression analyses. The two models had the following statistically significant associations:

- ‘Reporting being funded’ model: journal impact factor (odds ratio [OR] = 1.51, 95% confidence interval [CI] 1.15-1.96); and affiliation with an institution from a high-income country (reference category being middle or low-income countries; OR=14.17, 95% CI 3.95-50.90).
- ‘Explicit reporting on the role of funder’ model: paper is the first reporting on the findings of the trial (OR=3.47, 95% CI 1.21-9.96); journal impact factor (OR= 1.06, 95% CI 1.03-1.10); journal requires the reporting on the role of funder (OR=3.25, 95% CI 1.43-7.38); and funding from private-for-profit source (reference category being any other source of funding; OR=4.9, 95% CI 2.11-11.83).

## Proposed guidance

The proposed guidance provides suggestions for both funding information and the reporting process. Box 1 lists the funding information that relates to the phases of the research study for which the funding was received, the funding sources and the involvement of the funders in the process of the research study.

### Box 1: Suggestions for what funding information to report

Research phases for which funding was received

- Funding received to plan, conduct and/or report the research study under consideration.

Funding sources

- All funders, including the following, with specifications:

- Internal funding (specifying institution)
- Government(s) (specifying granting agency, level of government)
- Inter-government (two or more government agencies such as the European Union)
- Private-for-profit (listing companies/organisations)
- Not-for-profit (specifying support by private-for-profit if it exists, including the companies/organisations that provide support)
- Type of funding received including monetary support, provision of supplies, assistance in manuscript writing, etc.
- Value of monetary support and value of other supports.

#### Involvement (role) of funders

- Involvement (role) of each funder in the process of the research study, including:
  - Study planning and conduct: design, participant recruitment, data collection, data management, data analysis, quality control.
  - Study reporting (manuscript): medical writing assistance, preparation, review, approval, decision to submit.
  - Authorship: authors employed by the funder.

As for the process of reporting funding information, we suggest that the corresponding author plays the role of the guarantor of this information and take responsibility for:

- Collecting funding information and filling a standardised form;
- Sending the form to all co-authors for approval and verification of accuracy and completeness of the information;
- Submitting the up-to-date form at the time of submission of the manuscript for consideration for publication;
- Updating and re-submitting the form at the time of acceptance of the manuscript for final publication.

Appendix 3 provides a fillable PDF document for use as an instrument for standardised reporting of funding information.

## DISCUSSION

### Summary of findings

The objective of this study was to describe the characteristics of the funding statements in reports of clinical trials. About nine in ten trial reports included a funding statement and 96% of those statements indicated that funding existed (tables 1 and 2). The latter statements specified the source, amount, and role of funders in 100%, 1%, and 50% of cases respectively (tables 2 and 3). The most commonly reported sources of funding were government and private-for-profit sources (table 2). Of all funding contribution statements in which the source was identified as being a not-for-profit organisation, about half related to not-for-profit organisations for which we found evidence of support by private-for-profit organisation(s). Only three of those statements disclosed the support by the private-for profit-organisations. For trials of pharmacological or surgical interventions, only a fifth reported information on the supplier of the medication or device (table 3). We identified descriptions of a total of 22 different roles for the funders. Trials most frequently reported on roles related to the design of the study, data collection, data analysis, and manuscript preparation (table 4). We also propose a guidance and instrument for standardised reporting of funding information.

### Reporting of funding

The high percentage of trials that reported being funded may be explained by the fact that conducting an RCT typically requires a large number of resources.[46-48] Also, we found a positive association between reporting being funded and affiliation with an institution from a

1  
2  
3 high-income country. This may reflect better opportunities for, and higher ability of, institutions  
4 from high-income countries to obtain funding.  
5  
6  
7  
8  
9

10 Explicit reporting on the role of funder was associated with journal requirement for reporting on  
11 the role of funder. This might explain the relatively low percentage of trials that reported on the  
12 roles of funders given that only 31% of clinical journals require authors to state the role of funder  
13 (unpublished data from another methodological survey [3]). Explicit reporting on the role of  
14 funder was positively associated with trial funding from private-for-profit sources. This may be  
15 due to the adherence of the industry to higher standards of reporting. Indeed, several studies  
16 found that industry-funded trials had higher quality scores as compared to trials funded by other  
17 sources.[26, 49-52]  
18  
19  
20  
21  
22  
23  
24  
25  
26  
27  
28  
29  
30  
31

32 Both reporting being funded and explicit reporting on the role of funder were associated with  
33 higher journal impact factor. This is consistent with our previous findings that better reporting of  
34 authors' conflicts of interest is associated with higher journal impact factor for both systematic  
35 reviews and trials published in Core Clinical Journals.[43, 53]  
36  
37  
38  
39  
40  
41  
42

43 We found that half of not-for-profit organisations included in funding contribution statements  
44 were supported by private-for-profit organisation(s). This is probably an underestimate due to  
45 lack of reporting of such support by authors. This also suggests that these types of relationships  
46 are prevalent. Indeed, one recent study found that 96 national health organisations accepted  
47 money from the Coca-Cola Company, PepsiCo, or both,[54] with a number of these  
48 organisations known to fund research (e.g., Juvenile Diabetes Research Foundation). This is very  
49  
50  
51  
52  
53  
54  
55  
56  
57  
58  
59  
60

1  
2  
3 concerning given that the appearance of support by a not-for-profit may portray confidence in the  
4 study findings, in spite of the fact that the indirect for-profit support may have biased those  
5 findings.  
6  
7  
8  
9

### 10 11 12 **Strengths and limitations**

13  
14  
15 This is the first methodological survey of a large and representative sample of clinical RCTs to  
16 describe the characteristics of the funding statements in detail. Our proposed guidance and  
17 instrument for standardised reporting of funding information may serve researchers from  
18 different fields of health. Moreover, they may be used for other types of research studies and  
19 manuscripts and not only trials (e.g., systematic reviews). In addition, we used systematic and  
20 transparent methods for screening and data collection. As our study focused on clinical trials, our  
21 findings may not apply similarly to other fields, for example, health policy and systems research.  
22  
23  
24  
25  
26  
27  
28  
29  
30  
31  
32  
33

### 34 **Comparison to similar studies**

35  
36 We identified 22 studies on the reporting of funding information in clinical trials (see table 1) [5,  
37 19-39]. While all 22 studies focused on trials published in specific clinical areas or journals, our  
38 study assessed a wide sample of clinical trials published in any of the Core Clinical Journals.  
39 None of the 22 studies looked at whether the amount of funding was reported. In fact, we found  
40 that two trials in our sample reported amount. Two out of the 22 studies assessed reporting of  
41 provision of supplies in trials published between 1987 and 1994.[21, 23] To our knowledge, our  
42 study is the first one to survey a recent sample of trials for reporting of amount of funding and  
43 information on supplies.  
44  
45  
46  
47  
48  
49  
50  
51  
52  
53  
54  
55  
56  
57  
58  
59  
60

1  
2  
3 Only four out of the 22 studies assessed reporting on the roles of funders.[25, 29, 38, 39].  
4  
5 Whereas these studies assessed this in industry-funded or partially industry-funded trials, we  
6  
7 assessed this across all types of funders. For example, we found that 44% of trials funded solely  
8  
9 by governmental sources reported on the role of funder. Example statements from those that  
10  
11 reported involvement of the government as a funder include: “appointed an independent data and  
12  
13 safety monitoring board”, “had input into the study design and data interpretation” and  
14  
15 “reviewed and approved the report”.  
16  
17  
18  
19

20  
21  
22 Our previous study on clinical systematic reviews found that a third of systematic reviews did  
23  
24 not report on funding or reported no funding in comparison to 15% of trials in this study.[43]  
25  
26 When the included systematic reviews reported being funded, the most commonly reported  
27  
28 sources of funding were internal funding and government (52% and 67% respectively). While  
29  
30 only 2% of clinical systematic reviews reported funding from private-for-profit sources, we  
31  
32 found that 40% of clinical trials reported such funding. Moreover, trials were twice more likely  
33  
34 than systematic reviews to report on not-for-profit as their funding source (32% and 16%  
35  
36 respectively). While half of funded trials reported on the role of the funder, a quarter of funded  
37  
38 systematic reviews did so.  
39  
40  
41  
42  
43  
44  
45

46 In comparison to the CONSORT Checklist section on funding,[10, 11] our guidance provides  
47  
48 specific recommendations for the reporting of funding information and includes detailed  
49  
50 definitions and examples of types of funders. It also includes a clear classification of roles in  
51  
52 which funders may be involved in the process of the trial.  
53  
54  
55  
56  
57  
58  
59  
60

### **Implications for practice**

Our proposed guidance may help with clearer and more detailed reporting of the characteristics of funding in trials. This may in turn help readers and systematic reviewers better assess the significance of the funding and how it might affect the credibility of findings.[8, 55] Specifically, we recommend that trialists explicitly report more details on the funders, whether they are supported by for-profit organisations, the provision of drugs and equipment,[11] and on the role of funders.[25, 29, 38, 39] Authors have to be careful not to report funding information (i.e., grants received for the conduct of the study) in the conflict of interest section of the manuscript. Also, our findings have implications for reporting statements (such as CONSORT) for improving the reporting of funding information.

### **Implications for future research**

Future research should further explore the issue of funding of not-for profit organisations by for-profit organisations and the role of the latter in the planning, conduct and reporting of research studies. Future research could also assess for the accuracy and completeness of reporting of trial funding and roles of funders. Moreover, it would be interesting to explore reporting of funding in primary studies of other research fields (e.g., health policy and systems), especially that roles of funders may vary from those described in clinical trials.

## **FIGURES**

**Figure 1:** Study flow diagram

## **SUPPLEMENTARY FILE**

1  
2  
3 **Appendix 1:** Search strategy  
4

5 **Appendix 2:** Details of the multiple logistic regression analyses  
6  
7

8 **Appendix 3:** Instrument for reporting of funding information  
9  
10  
11  
12  
13  
14  
15  
16  
17  
18  
19  
20  
21  
22  
23  
24  
25  
26  
27  
28  
29  
30  
31  
32  
33  
34  
35  
36  
37  
38  
39  
40  
41  
42  
43  
44  
45  
46  
47  
48  
49  
50  
51  
52  
53  
54  
55  
56  
57  
58  
59  
60

For peer review only



## CONTRIBUTIONS

1  
2  
3  
4  
5  
6 MBH, GG, and EAA conceived and designed the study. MBH coordinated the study throughout.  
7  
8 EAA had full access to all of the data in the study and takes responsibility for the integrity of the  
9  
10 data and the accuracy of the data analysis. MBH, NJ, and MK screened papers for inclusion.  
11  
12 MBH, NJ, EAA-J, DJH, EAA-J, LCL, MZH, MA-G, and SA extracted the data. MBH and EAA  
13  
14 analysed and interpreted the data. MBH wrote the first draft of the manuscript with EAA. MBH  
15  
16 and EAA developed the first draft of the fillable PDF document. All authors critically revised the  
17  
18 manuscript and approved the final version. The lead author EAA affirms that this manuscript is  
19  
20 an honest, accurate and transparent account of the study being reported; that no important aspects  
21  
22 of the study have been omitted; and that any discrepancies from the study as planned have been  
23  
24 explained.  
25  
26  
27  
28  
29  
30  
31

## COMPETING INTERESTS

32  
33  
34 All authors have completed the ICMJE uniform disclosure form at  
35  
36 [http://www.icmje.org/coi\\_disclosure.pdf](http://www.icmje.org/coi_disclosure.pdf) and declare no conflicts of interest.  
37  
38  
39  
40

## FUNDING

41  
42  
43 This project was funded by the American University of Beirut Faculty of Medicine's Medical  
44  
45 Practice Plan (MPP) funds. The funder had no role in the design and conduct of the study;  
46  
47 collection, management, analysis, and interpretation of the data; preparation, review, or approval  
48  
49 of the manuscript; and decision to submit the manuscript for publication. The authors and their  
50  
51 contributions to the manuscript are independent from the funder.  
52  
53  
54  
55  
56  
57  
58  
59  
60

1  
2  
3 **ETHICAL APPROVAL**  
4

5 Not required.  
6  
7  
8  
9

10 **DATA SHARING**  
11

12 Data available upon request.  
13  
14  
15  
16  
17  
18  
19  
20  
21  
22  
23  
24  
25  
26  
27  
28  
29  
30  
31  
32  
33  
34  
35  
36  
37  
38  
39  
40  
41  
42  
43  
44  
45  
46  
47  
48  
49  
50  
51  
52  
53  
54  
55  
56  
57  
58  
59  
60

For peer review only

## REFERENCES

1. Amiri, A.R., K. Kanesalingam, S. Cro, et al., Does source of funding and conflict of interest influence the outcome and quality of spinal research? *Spine J*, 2014;14(2):308-14.
2. Bartels, R.H., H. Delye and J. Boogaarts, Financial disclosures of authors involved in spine research: an underestimated source of bias. *Eur Spine J*, 2012;21(7):1229-33.
3. Crocetti, M.T., D.D. Amin and R. Scherer, Assessment of risk of bias among pediatric randomised controlled trials. *Pediatrics*, 2010;126(2):298-305.
4. Lesser, L.I., C.B. Ebbeling, M. Goozner, et al., Relationship between funding source and conclusion among nutrition-related scientific articles. *PLoS Med*, 2007;4(1):e5.
5. Mugambi, M.N., A. Musekiwa, M. Lombard, et al., Association between funding source, methodological quality and research outcomes in randomised controlled trials of synbiotics, probiotics and prebiotics added to infant formula: a systematic review. *BMC Med Res Methodol*, 2013;13:137.
6. Riaz, H., S. Raza, M.S. Khan, et al., Impact of Funding Source on Clinical Trial Results Including Cardiovascular Outcome Trials. *Am J Cardiol*, 2015;116(12):1944-7.
7. Kasenda, B., E. von Elm, J.J. You, et al., Agreements between Industry and Academia on Publication Rights: A Retrospective Study of Protocols and Publications of Randomised Clinical Trials. *PLoS Med*, 2016;13(6):e1002046.
8. Kesselheim, A.S., C.T. Robertson, J.A. Myers, et al., A randomised study of how physicians interpret research funding disclosures. *N Engl J Med*, 2012;367(12):1119-27.
9. Coultas, D., Ethical considerations in the interpretation and communication of clinical trial results. *Proc Am Thorac Soc*, 2007;4(2):194-8; discussion 198-9.
10. Schulz, K.F., D.G. Altman, D. Moher, et al., CONSORT 2010 Statement: Updated guidelines for reporting parallel group randomised trials. *J Clin Epidemiol*, 2010;63(8):834-40.
11. Moher, D., S. Hopewell, K.F. Schulz, et al., CONSORT 2010 Explanation and Elaboration: Updated guidelines for reporting parallel group randomised trials. *J Clin Epidemiol*, 2010;63(8):e1-37.
12. The Independent. A recent study that said Diet Coke can help you lose weight was quietly funded by Coca-Cola, Sunday 17 January 2016. Available from: <http://www.independent.co.uk/news/science/study-that-said-diet-fizzy-drinks-can-help-weight-loss-was-quietly-funded-by-coca-cola-and-pepsi-a6817686.html>.
13. The New York Times. Coca-Cola Funds Scientists Who Shift Blame for Obesity Away From Bad Diets, August 9, 2015. Available from: [http://well.blogs.nytimes.com/2015/08/09/coca-cola-funds-scientists-who-shift-blame-for-obesity-away-from-bad-diets/?\\_r=0](http://well.blogs.nytimes.com/2015/08/09/coca-cola-funds-scientists-who-shift-blame-for-obesity-away-from-bad-diets/?_r=0).
14. Rogers, P.J., P.S. Hogenkamp, C. de Graaf, et al., Does low-energy sweetener consumption affect energy intake and body weight? A systematic review, including meta-analyses, of the evidence from human and animal studies. *Int J Obes (Lond)*, 2016;40(3):381-94.
15. International Life Sciences Institute. Mission & Operating Principles. 2016; Available from: <http://ilsi.org/about/mission/>.

16. The Sugar Association, I. Research. November 15, 2016]; Available from: <https://www.sugar.org/research/>.
17. Kearns, C.E., L.A. Schmidt and S.A. Glantz, Sugar Industry and Coronary Heart Disease Research: A Historical Analysis of Internal Industry Documents. *JAMA Intern Med*, 2016;176(11):1680-1685.
18. Kmietowicz, Z., Coca-Cola funded group set up to promote "energy balance" is disbanded. *BMJ*, 2015;351:h6590.
19. Als-Nielsen, B., W. Chen, C. Gluud, et al., Association of funding and conclusions in randomised drug trials: a reflection of treatment effect or adverse events? *JAMA*, 2003;290(7):921-8.
20. Etter, J.F., M. Burri and J. Stapleton, The impact of pharmaceutical company funding on results of randomised trials of nicotine replacement therapy for smoking cessation: a meta-analysis. *Addiction*, 2007;102(5):815-22.
21. Rochon, P.A., J.H. Gurwitz, R.W. Simms, et al., A study of manufacturer-supported trials of nonsteroidal anti-inflammatory drugs in the treatment of arthritis. *Arch Intern Med*, 1994;154(2):157-63.
22. Momeni, A., A. Becker, H. Bannasch, et al., Association between research sponsorship and study outcome in plastic surgery literature. *Ann Plast Surg*, 2009;63(6):661-4.
23. Yaphe, J., R. Edman, B. Knishkowsky, et al., The association between funding by commercial interests and study outcome in randomised controlled drug trials. *Fam Pract*, 2001;18(6):565-8.
24. Peppercorn, J., E. Blood, E. Winer, et al., Association between pharmaceutical involvement and outcomes in breast cancer clinical trials. *Cancer*, 2007;109(7):1239-46.
25. Bero, L., F. Oostvogel, P. Bacchetti, et al., Factors associated with findings of published trials of drug-drug comparisons: why some statins appear more efficacious than others. *PLoS Med*, 2007;4(6):e184.
26. Djulbegovic, B., M. Lacey, A. Cantor, et al., The uncertainty principle and industry-sponsored research. *Lancet*, 2000;356(9230):635-8.
27. Clifford, T.J., N.J. Barrowman and D. Moher, Funding source, trial outcome and reporting quality: are they related? Results of a pilot study. *BMC Health Serv Res*, 2002;2(1):18.
28. Bhandari, M., J.W. Busse, D. Jackowski, et al., Association between industry funding and statistically significant pro-industry findings in medical and surgical randomised trials. *CMAJ*, 2004;170(4):477-80.
29. Tuech, J.J., G. Moutel, P. Pessaux, et al., Disclosure of competing financial interests and role of sponsors in phase III cancer trials. *Eur J Cancer*, 2005;41(15):2237-40.
30. Shah, R.V., T.J. Albert, V. Bruegel-Sanchez, et al., Industry support and correlation to study outcome for papers published in Spine. *Spine (Phila Pa 1976)*, 2005;30(9):1099-104; discussion 1105.
31. Tungaraza, T. and R. Poole, Influence of drug company authorship and sponsorship on drug trial outcomes. *Br J Psychiatry*, 2007;191:82-3.
32. Ridker, P.M. and J. Torres, Reported outcomes in major cardiovascular clinical trials funded by for-profit and not-for-profit organisations: 2000-2005. *JAMA*, 2006;295(19):2270-4.

- 1  
2  
3  
4 33. Voineskos, S.H., C.J. Coroneos, N.I. Ziolkowski, et al., A Systematic Review of Surgical  
5 Randomised Controlled Trials: Part 2. Funding Source, Conflict of Interest, and Sample  
6 Size in Plastic Surgery. *Plast Reconstr Surg*, 2016;137(2):453e-461e.
- 7 34. Montgomery, J.H., M. Byerly, T. Carmody, et al., An analysis of the effect of funding  
8 source in randomised clinical trials of second generation antipsychotics for the  
9 treatment of schizophrenia. *Control Clin Trials*, 2004;25(6):598-612.
- 10 35. Perlis, C.S., M. Harwood and R.H. Perlis, Extent and impact of industry sponsorship  
11 conflicts of interest in dermatology research. *J Am Acad Dermatol*, 2005;52(6):967-71.
- 12 36. Khan, N.A., J.I. Lombeida, M. Singh, et al., Association of industry funding with the  
13 outcome and quality of randomised controlled trials of drug therapy for rheumatoid  
14 arthritis. *Arthritis Rheum*, 2012;64(7):2059-67.
- 15 37. Hodgson, R., R. Allen, E. Broderick, et al., Funding source and the quality of reports of  
16 chronic wounds trials: 2004 to 2011. *Trials*, 2014;15:19.
- 17 38. Bridoux, V., G. Moutel, L. Schwarz, et al., Disclosure of funding sources and conflicts of  
18 interest in phase III surgical trials: survey of ten general surgery journals. *World J Surg*,  
19 2014;38(10):2487-93.
- 20 39. Lundh, A., L.T. Krogsboll and P.C. Gotzsche, Sponsors' participation in conduct and  
21 reporting of industry trials: a descriptive study. *Trials*, 2012;13:146.
- 22 40. Akl, E.A., M. Briel, J.J. You, et al., Potential impact on estimated treatment effects of  
23 information lost to follow-up in randomised controlled trials (LOST-IT): systematic  
24 review. *BMJ*, 2012;344:e2809.
- 25 41. Akl, E.A., A. Carrasco-Labra, R. Brignardello-Petersen, et al., Reporting, handling and  
26 assessing the risk of bias associated with missing participant data in systematic reviews:  
27 a methodological survey. *BMJ Open*, 2015;5(9):e009368.
- 28 42. Shawwa, K., R. Kallas, S. Koujanian, et al., Requirements of Clinical Journals for Authors'  
29 Disclosure of Financial and Non-Financial Conflicts of Interest: A Cross Sectional Study.  
30 *PLoS One*, 2016;11(3):e0152301.
- 31 43. Hakoum, M.B., S. Anouti, M. Al-Gibbawi, et al., Reporting of financial and non-financial  
32 conflicts of interest by authors of systematic reviews: a methodological survey. *BMJ*  
33 *Open*, 2016;6(8):e011997.
- 34 44. Moher, D., A. Liberati, J. Tetzlaff, et al., Preferred reporting items for systematic reviews  
35 and meta-analyses: the PRISMA Statement. *Open Med*, 2009;3(3):e123-30.
- 36 45. Harris, P.A., R. Taylor, R. Thielke, et al., Research electronic data capture (REDCap) - A  
37 metadata-driven methodology and workflow process for providing translational  
38 research informatics support. *J Biomed Inform.*, 2009, Apr;42(2):377-81.
- 39 46. Glass, H.E. and K. Hollander, Managing clinical grant costs. *Contemp Clin Trials*,  
40 2009;30(3):221-6.
- 41 47. Idoko, O.T., S. Kochhar, T.E. Agbenyega, et al., Impact, challenges, and future projections  
42 of vaccine trials in Africa. *Am J Trop Med Hyg*, 2013;88(3):414-9.
- 43 48. Ravinetto, R., K. De Nys, M. Boelaert, et al., Sponsorship in non-commercial clinical  
44 trials: definitions, challenges and the role of Good Clinical Practices guidelines. *BMC Int*  
45 *Health Hum Rights*, 2015;15:34.
- 46 49. Pengel, L.H., L. Barcena and P.J. Morris, The quality of reporting of randomised  
47 controlled trials in solid organ transplantation. *Transpl Int*, 2009;22(4):377-84.
- 48  
49  
50  
51  
52  
53  
54  
55  
56  
57  
58  
59  
60

- 1  
2  
3  
4  
5  
6  
7  
8  
9  
10  
11  
12  
13  
14  
15  
16  
17  
18  
19  
20  
21  
22  
23  
24  
25  
26  
27  
28  
29  
30  
31  
32  
33  
34  
35  
36  
37  
38  
39  
40  
41  
42  
43  
44  
45  
46  
47  
48  
49  
50  
51  
52  
53  
54  
55  
56  
57  
58  
59  
60
50. Rios, L.P., A. Oduyungbo, M.O. Moitri, et al., Quality of reporting of randomised controlled trials in general endocrinology literature. *J Clin Endocrinol Metab*, 2008;93(10):3810-6.
  51. Yuen, S.Y. and J.E. Pope, Learning from past mistakes: assessing trial quality, power and eligibility in non-renal systemic lupus erythematosus randomised controlled trials. *Rheumatology (Oxford)*, 2008;47(9):1367-72.
  52. Lexchin, J., L.A. Bero, B. Djulbegovic, et al., Pharmaceutical industry sponsorship and research outcome and quality: systematic review. *BMJ*, 2003;326(7400):1167-70.
  53. Hakoum, M.B., N. Jouni, E.A. Abou-Jaoude, et al., *Reporting of financial and non-financial, individual and institutional conflicts of interest in clinical trials: a methodological survey*. 2016: Submitted for publication.
  54. Aaron, D.G. and M.B. Siegel, Sponsorship of National Health Organisations by Two Major Soda Companies. *Am J Prev Med*, 2016.
  55. Elia, N., E. von Elm, A. Chatagner, et al., How do authors of systematic reviews deal with research malpractice and misconduct in original studies? A cross-sectional analysis of systematic reviews and survey of their authors. *BMJ Open*, 2016;6(3):e010442.

1  
2  
3  
4  
5  
6  
7  
8  
9  
10  
11  
12  
13  
14  
15  
16  
17  
18  
19  
20  
21  
22  
23  
24  
25  
26  
27  
28  
29  
30  
31  
32  
33  
34  
35  
36  
37  
38  
39  
40  
41  
42  
43  
44  
45  
46  
47  
48  
49  
50  
51  
52  
53  
54  
55  
56  
57  
58  
59  
60

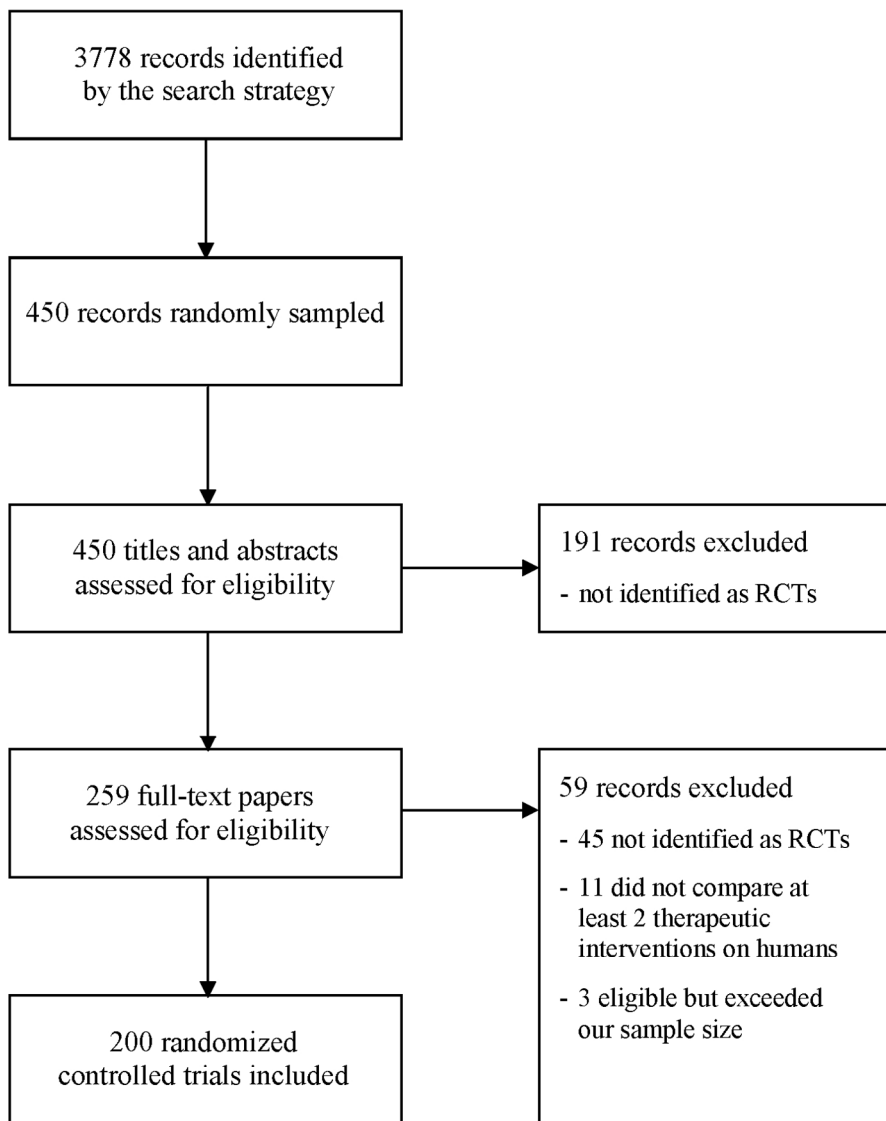

Study flow diagram

130x160mm (300 x 300 DPI)

## APPENDICES

### Appendix 1: Search strategy

MEDLINE (Ovid interface) search strategy for randomized controlled trials (Filter obtained from the Cochrane Handbook, under the Cochrane Highly Sensitive Search Strategy for identifying randomized trials in MEDLINE: sensitivity- and precision-maximizing version (2008 revision))

1. randomized controlled trial.pt.
2. controlled clinical trial.pt.
3. randomized.ab.
4. placebo.ab.
5. clinical trials as topic.sh.
6. randomly.ab.
7. trial.ti.
8. 1 or 2 or 3 or 4 or 5 or 6 or 7
9. exp animals/ not humans.sh.
10. 8 not 9
11. limit 10 to ("core clinical journals (aim)" and yr="2015")



## Appendix 2: Details of the multiple logistic regression analyses

### Analysis 1

#### Dependent variable (categorical)

- Reporting being funded (funded vs. not funded/not reported); all trials (N=200)

#### Independent variables

1. Type of intervention (categorical, pharmacologic vs. non-pharmacologic)
2. Paper is the first one reporting on the findings of the trial (categorical, yes vs. no)
3. Conflict of interest disclosure (COI present vs. COI absent/not reported)  
*We did not include this variable in the final model since we found it to be highly correlated with the dependent variable.*
4. Level of risk of bias associated with allocation concealment (categorical, low risk vs. high risk/unclear)
5. Journal impact factor (continuous)
6. Number of randomized participants (continuous)
7. Classification of the country of the institution to which the first author is affiliated (categorical, high-income vs. middle or low-income)

## Results

|                                                                                                                                                | Adjusted OR<br>(95% CI) | p-value |
|------------------------------------------------------------------------------------------------------------------------------------------------|-------------------------|---------|
| Type of intervention<br>(pharmacologic as opposed to non-pharmacologic)                                                                        | 1.79<br>(0.61 – 5.22)   | 0.284   |
| Paper is the first one reporting on the findings of the trial                                                                                  | 0.63<br>(0.12 – 3.22)   | 0.577   |
| Level of risk of bias associated with allocation concealment<br>(low risk as opposed to high risk/unclear)                                     | 2.30<br>(0.62 – 8.38)   | 0.209   |
| Journal impact factor *                                                                                                                        | 1.43<br>(1.11 – 1.86)   | 0.006   |
| Number of randomized participants                                                                                                              | 1.00<br>(1.00 – 1.00)   | 0.477   |
| Classification of the country of the institution to which the first author is affiliated *<br>(high-income as opposed to middle or low-income) | 16.25<br>(4.03 – 65.5)  | <0.0001 |
| Journal requirement for reporting on the role of funder                                                                                        | 1.02<br>(0.36 – 2.84)   | 0.974   |

OR = odds ratio; CI = confidence interval

\* p-values for statistically significant associations.

## Analysis 2

## Dependent variable (categorical)

- Explicit reporting of the role of funder (reported vs. not reported); trials that reported being funded (N=171)

## Independent variables

1. Type of intervention (categorical, pharmacologic vs. non-pharmacologic)
2. Paper is the first one reporting on the findings of the trial (categorical, yes vs. no)
3. Conflict of interest disclosure (COI present vs. COI absent/not reported)  
*We did not include this variable in the final model since we found it to be highly correlated with the dependent variable.*
4. Level of risk of bias associated with allocation concealment (categorical, low risk vs. high risk/unclear)
5. Journal impact factor (continuous)
6. Number of randomized participants (continuous)
7. Classification of the country of the institution to which the first author is affiliated (categorical, high-income vs. middle or low-income)
8. Journal requirement for reporting on the role of funder (categorical, yes vs. no)
9. Funding from private-for-profit source(s) as opposed to all other sources of funding (categorical, yes vs. no)

## Results

|                                                                                                                                              | Adjusted OR<br>(95% CI) | p-value |
|----------------------------------------------------------------------------------------------------------------------------------------------|-------------------------|---------|
| Type of intervention<br>(pharmacologic as opposed to non-pharmacologic)                                                                      | 1.60<br>(0.71 – 3.58)   | 0.261   |
| Paper is the first one reporting on the findings of the trial *                                                                              | 3.47<br>(1.21 – 9.96)   | 0.021   |
| Level of risk of bias associated with allocation concealment<br>(low risk as opposed to high risk/unclear)                                   | 0.53<br>(0.22 – 1.32)   | 0.174   |
| Journal impact factor *                                                                                                                      | 1.06<br>(1.03 – 1.10)   | <0.0001 |
| Number of randomized participants                                                                                                            | 1.00<br>(1.00 – 1.00)   | 0.152   |
| Classification of the country of the institution to which the first author is affiliated<br>(high-income as opposed to middle or low-income) | 3.30<br>(0.41 – 26.60)  | 0.262   |
| Journal requirement for reporting on the role of funder *                                                                                    | 3.25<br>(1.43 – 7.38)   | 0.005   |
| Funding from private-for-profit source(s) *                                                                                                  | 4.9<br>(2.11 – 11.83)   | <0.0001 |

OR = odds ratio; CI = confidence interval

\* p-values for statistically significant associations.

1  
2  
3  
4  
5  
6  
7  
8  
9  
10  
11  
12  
13  
14  
15  
16  
17  
18  
19  
20  
21  
22  
23  
24  
25  
26  
27  
28  
29  
30  
31  
32  
33  
34  
35  
36  
37  
38  
39  
40  
41  
42  
43  
44  
45  
46  
47  
48  
49

**Appendix 3: Instrument for reporting of funding information**

When filling this form, please report on all funding received to plan, conduct and/or report the research study under consideration, including the protocol, first and subsequent reports.

**SECTION 1  
STUDY INFORMATION**

1. Name of corresponding author

First name:

Last name:

2. Manuscript title

**SECTION 2  
FUNDING RECEIVED**

3. Did you receive any funding (monetary support, provision of supplies, assistance in manuscript writing, etc.) for the research study?

Yes

No

**If yes, please answer the question below and complete the form. Definitions and examples are provided in section 7.**

4. The funding received was used in the following steps of the research study (more than one option may apply):

- Planning
- Conduct
- Reporting

**SECTION 3  
FUNDING SOURCES**

5. Please list the study’s funding sources. For each source listed, please provide additional details and if applicable, report information on provision of supplies related to the research study.

| Funding sources | Type of funder | Grant (if applicable) | Monetary support (indicate value) | Provision of supplies (if applicable) |                |
|-----------------|----------------|-----------------------|-----------------------------------|---------------------------------------|----------------|
|                 |                |                       |                                   | Type of supplies                      | Monetary value |
|                 |                |                       |                                   |                                       |                |
|                 |                |                       |                                   |                                       |                |
|                 |                |                       |                                   |                                       |                |
|                 |                |                       |                                   |                                       |                |
|                 |                |                       |                                   |                                       |                |

**SECTION 4  
INVOLVEMENT OF FUNDING SOURCE**

6. Please indicate the involvement of the funder(s) in the following roles by checking the respective cells.

| Funding source | Study planning and conduct |                         |                 |                 |               |                 | Study reporting (manuscript) |             |        |          | Authorship         |                                                |
|----------------|----------------------------|-------------------------|-----------------|-----------------|---------------|-----------------|------------------------------|-------------|--------|----------|--------------------|------------------------------------------------|
|                | Design                     | Participant recruitment | Data collection | Data management | Data analysis | Quality control | Medical writing assistance   | Preparation | Review | Approval | Decision to submit | Are any of the authors employed by the funder? |
|                |                            |                         |                 |                 |               |                 |                              |             |        |          |                    |                                                |
|                |                            |                         |                 |                 |               |                 |                              |             |        |          |                    |                                                |
|                |                            |                         |                 |                 |               |                 |                              |             |        |          |                    |                                                |
|                |                            |                         |                 |                 |               |                 |                              |             |        |          |                    |                                                |
|                |                            |                         |                 |                 |               |                 |                              |             |        |          |                    |                                                |

7. If the funder was involved in any roles other than those listed above, please indicate them here:

1  
2  
3  
4  
5  
6  
7  
8  
9  
10  
11  
12  
13  
14  
15  
16  
17  
18  
19  
20  
21  
22  
23  
24  
25  
26  
27  
28  
29  
30  
31  
32  
33  
34  
35  
36  
37  
38  
39  
40  
41  
42  
43  
44  
45  
46  
47  
48  
49

**SECTION 5  
ADDITIONAL INFORMATION**

8. Please use the space below to provide any additional information related to the study’s funding sources.

[Empty text box for providing additional information related to the study’s funding sources.]

**SECTION 6  
GUARANTOR CERTIFICATION**

This person, \_\_\_\_\_, acts as the guarantor of the study, certifies that the information in this form is accurate and complete, and confirms the following:

- The co-authors approved and verified the form for accuracy and completeness of the information.
- The form was updated at the time of submission of the manuscript for consideration for publication.
- The form was updated at the time of acceptance of the manuscript for final publication.

Date of last update (dd-mm-yyyy):

## SECTION 7 DEFINITIONS AND EXAMPLES

### TYPE OF FUNDER

- **Internal funder:** refers to a funder that is the author's own institution or employer. This term typically refers to an academic institution. Conceivably, it could refer to a non-academic institution (e.g., pharmaceutical company) when it funded a study conducted by its employees.  
*Example statements: internal research account, support through being the "Chair of –", intramural fund, funding provided by the academic institution, university, or hospital.*
- **External funder:** refers to a funder different than the author's own institution or employer. Types of external funders include:
  - **Government:** governmental bodies, organizations, or associations at the national, regional (e.g., provincial), or local (e.g., municipal) levels.  
*Examples: National Institutes of Health (USA), the Danish Agency for Science Technology and Innovation.*
  - **Inter-government:** two or more government agencies.  
*Examples: European Union.*
  - **Private-for-profit:** an organization whose primary goal is to make profit.  
*Examples: drug or device industry, private company, insurance company, private laboratory.*
  - **Not-for-profit supported by private-for-profit (a health industry):** a not-for-profit organization that is a partner of, or receives support (typically in the form of funding), from at least one private-for-profit organization known to manufacture drugs or surgical devices.  
*Examples: "The Epilepsy Foundation's mission is funded through the generous gifts of individual donors and many partner organizations, including corporations and corporate foundations, member organizations, and both state and federal government agencies, including the Centers for Disease Control and Prevention.", "The Pfizer Foundation is a charitable organization established by Pfizer Inc."*
  - **Not-for-profit supported by private-for-profit (not a health industry):** a not-for-profit organization that is a partner of, or receives support (typically in the form of funding), from at least one private-for-profit organization not known to manufacture drugs or surgical devices.



1  
2  
3  
4  
5  
6  
7  
8  
9  
10  
11  
12  
13  
14  
15  
16  
17  
18  
19  
20  
21  
22  
23  
24  
25  
26  
27  
28  
29  
30  
31  
32  
33  
34  
35  
36  
37  
38  
39  
40  
41  
42  
43  
44  
45  
46  
47  
48  
49

*Examples: Bill and Melinda Gates Foundation, Ford Foundation.*

- **Not-for-profit not supported by private-for-profit:** a not-for-profit organization (e.g., philanthropic foundation) that is not known to be a partner of or receive support from any private-for-profit organization.

*Examples: an academic department or any philanthropic foundation not classified as any of the above.*

## INVOLVEMENT OF FUNDING SOURCE

Funders may play a role in one or more steps of the research study. It is important to indicate whether a funder is involved in each of the following steps:

- **Study planning and conduct**
  - Study design and drafting the protocol;
  - Study management;
  - Participant recruitment;
  - Data collection;
  - Data management (e.g., verifying accuracy, storing data);
  - Data analysis;
  - Quality control (e.g., oversight, auditing).
- **Study reporting (manuscript)**
  - Medical writing assistance: refers to providing a medical writer or covering the writer's fees;
  - Preparation: relates to drafting the manuscript;
  - Review of the manuscript;
  - Approval of the final version of the manuscript;
  - Decision to submit the manuscript for publication.
- **Authorship**
  - This relates to at least one of the employees of the funder being an author on the manuscript.
- **Other roles**

These include roles that are not captured by the steps listed above.

# BMJ Open

## Characteristics of funding of clinical trials: cross-sectional survey and proposed guidance

|                                 |                                                                                                                                                                                                                                                                                                                                                                                                                                                                                                                                                                                                                                                                                                                                                                                                                                                                                                                                                                        |
|---------------------------------|------------------------------------------------------------------------------------------------------------------------------------------------------------------------------------------------------------------------------------------------------------------------------------------------------------------------------------------------------------------------------------------------------------------------------------------------------------------------------------------------------------------------------------------------------------------------------------------------------------------------------------------------------------------------------------------------------------------------------------------------------------------------------------------------------------------------------------------------------------------------------------------------------------------------------------------------------------------------|
| Journal:                        | <i>BMJ Open</i>                                                                                                                                                                                                                                                                                                                                                                                                                                                                                                                                                                                                                                                                                                                                                                                                                                                                                                                                                        |
| Manuscript ID                   | bmjopen-2017-015997.R1                                                                                                                                                                                                                                                                                                                                                                                                                                                                                                                                                                                                                                                                                                                                                                                                                                                                                                                                                 |
| Article Type:                   | Research                                                                                                                                                                                                                                                                                                                                                                                                                                                                                                                                                                                                                                                                                                                                                                                                                                                                                                                                                               |
| Date Submitted by the Author:   | 10-May-2017                                                                                                                                                                                                                                                                                                                                                                                                                                                                                                                                                                                                                                                                                                                                                                                                                                                                                                                                                            |
| Complete List of Authors:       | Hakoum, Maram; American University of Beirut Medical Center, Clinical Research Institute<br>Jouni, Nahla; American University of Beirut, Faculty of Agriculture and Food Sciences<br>Abou-Jaoude, Eliane; University at Buffalo - The State University of New York, Department of Internal Medicine<br>Hasbani, Divina ; American University of Beirut Faculty of Medicine<br>Abou-Jaoude, Elias; University at Buffalo - The State University of New York<br>Lopes, Luciane; University of Sorocaba, Pharmacology<br>Khaldieh, Mariam; American University of Beirut, Faculty of Sciences<br>Hammoud, Mira; Massachusetts General Hospital, Department of Psychiatry<br>Al-Gibbawi, Mounir; American University of Beirut Faculty of Medicine<br>Anouti, Sirine; American University of Beirut, Department of Epidemiology and Population Health<br>Guyatt, Gordon; McMaster University,<br>Akl, Elie; American University of Beirut, Department of Internal Medicine |
| <b>Primary Subject Heading</b>: | Research methods                                                                                                                                                                                                                                                                                                                                                                                                                                                                                                                                                                                                                                                                                                                                                                                                                                                                                                                                                       |
| Secondary Subject Heading:      | Ethics, Medical publishing and peer review, Research methods                                                                                                                                                                                                                                                                                                                                                                                                                                                                                                                                                                                                                                                                                                                                                                                                                                                                                                           |
| Keywords:                       | funding, role of funder, randomised controlled trial                                                                                                                                                                                                                                                                                                                                                                                                                                                                                                                                                                                                                                                                                                                                                                                                                                                                                                                   |
|                                 |                                                                                                                                                                                                                                                                                                                                                                                                                                                                                                                                                                                                                                                                                                                                                                                                                                                                                                                                                                        |

SCHOLARONE™  
Manuscripts

1  
2  
3 **1 Characteristics of funding of clinical trials: cross-sectional survey and proposed guidance**  
4

5  
6 **2**  
7  
8 Maram B. Hakoum, Nahla Jouni, Eliane A. Abou-Jaoude, Divina Justina Hasbani, Elias A.  
9  
10 Abou-Jaoude, Luciane Cruz Lopes, Mariam Khaldieh, Mira Z. Hammoud, Mounir Al-Gibbawi,  
11  
12 Sirine Anouti, Gordon Guyatt, Elie A. Akl  
13  
14

15  
16  
17  
18 Maram B. Hakoum; MD; maram.hakoum@gmail.com <sup>1</sup>  
19

20 8 Nahla Jouni; BS; nahla.jouni@gmail.com <sup>2</sup>  
21

22 9 Eliane A. Abou-Jaoude; MD; eaaj22@gmail.com <sup>3</sup>  
23

24 10 Divina Justina Hasbani; BS; divinahasbani@gmail.com <sup>4</sup>  
25

26 11 Elias A. Abou-Jaoude; MBA; eliasaj93@gmail.com <sup>5</sup>  
27

28 12 Luciane Cruz Lopes; PhD; luslopes@terra.com.br <sup>6</sup>  
29

30 13 Mariam Khaldieh; BS; mek11@mail.aub.edu <sup>7</sup>  
31

32 14 Mira Zein Hammoud; MD; mirahammoud@gmail.com <sup>8</sup>  
33

34 15 Mounir Al Gibbawi; BS; mounir.algibbawi@gmail.com <sup>4</sup>  
35

36 16 Sirine Anouti; MPH; sirine.anouti@gmail.com <sup>9</sup>  
37

38 17 Gordon Guyatt; MD, MSc.; guyatt@mcmaster.ca <sup>10</sup>  
39

40 18 Elie A. Akl; MD, MPH, PhD; ea32@aub.edu.lb <sup>1,10,11</sup>  
41  
42

43  
44  
45  
46  
47  
48 <sup>1</sup> Clinical Research Institute, American University of Beirut Medical Center, Beirut, Lebanon  
49

50 <sup>2</sup> Faculty of Agriculture and Food Sciences, American University of Beirut, Beirut, Lebanon  
51

52 <sup>3</sup> Department of Internal Medicine, State University of New York at Buffalo, New York, United  
53  
54  
55 States of America  
56  
57  
58  
59  
60

1  
2  
3 1 <sup>4</sup> Faculty of Medicine, American University of Beirut, Beirut, Lebanon  
4

5 2 <sup>5</sup> State University of New York at Buffalo, New York, United States of America  
6

7 3 <sup>6</sup> Graduate Program in Pharmaceutical Sciences, University of Sorocaba, São Paulo, Brazil  
8

9 4 <sup>7</sup> Faculty of Sciences, American University of Beirut, Beirut, Lebanon  
10

11 5 <sup>8</sup> Department of Psychiatry, Massachusetts General Hospital, Boston, United States of America  
12

13 6 <sup>9</sup> Department of Epidemiology and Population Health, American University of Beirut, Beirut,  
14

15 7 Lebanon  
16

17 8 <sup>10</sup> Department of Health Research Methods, Evidence, and Impact, McMaster University,  
18

19 9 Hamilton, Ontario, Canada  
20

21 10 <sup>11</sup> Department of Internal Medicine, American University of Beirut Medical Center, Beirut,  
22

23 11 Lebanon  
24

25 12  
26

27 13 **Corresponding Author:**  
28

29 14 Elie A. Akl, MD, MPH, PhD  
30

31 15 Department of Internal Medicine  
32

33 16 American University of Beirut Medical Center  
34

35 17 P.O. Box: 11-0236  
36

37 18 Riad-El-Solh Beirut 1107 2020  
38

39 19 Beirut – Lebanon  
40

41 20 Phone: +961 1 374374  
42

43 21 ea32@aub.edu.lb  
44  
45  
46  
47  
48  
49  
50  
51  
52  
53  
54  
55  
56  
57  
58  
59  
60

1  
2  
3 1 "The Corresponding Author has the right to grant on behalf of all authors and does grant on  
4  
5 2 behalf of all authors, a worldwide licence to the Publishers and its licensees in perpetuity, in all  
6  
7 3 forms, formats and media (whether known now or created in the future), to i) publish, reproduce,  
8  
9 4 distribute, display and store the Contribution, ii) translate the Contribution into other languages,  
10  
11 5 create adaptations, reprints, include within collections and create summaries, extracts and/or,  
12  
13 6 abstracts of the Contribution and convert or allow conversion into any format including without  
14  
15 7 limitation audio, iii) create any other derivative work(s) based in whole or part on the  
16  
17 8 Contribution, iv) to exploit all subsidiary rights to exploit all subsidiary rights that currently exist  
18  
19 9 or as may exist in the future in the Contribution, v) the inclusion of electronic links from the  
20  
21 10 Contribution to third party material where-ever it may be located; and, vi) licence any third party  
22  
23 11 to do any or all of the above."  
24  
25  
26  
27  
28  
29  
30  
31  
32  
33  
34  
35  
36  
37  
38  
39  
40  
41  
42  
43  
44  
45  
46  
47  
48  
49  
50  
51  
52  
53  
54  
55  
56  
57  
58  
59  
60

13 **Keywords:** funding, role of funder, randomised controlled trial

15 **Word count:** 3,675 words

## 1 ABSTRACT

2 **Objectives:** To provide a detailed and current characterisation of funding of a representative  
3 sample clinical trials. We also aimed to develop guidance for standardised reporting of funding  
4 information.

5 **Methods:** We addressed the extent to which clinical trials published in 2015 in any of the 119  
6 Core Clinical Journals included a statement on the funding source (e.g., whether a not-for-profit  
7 organisation was supported by a private-for-profit), type of funding, amount and role of funder.  
8 We used a stepwise approach to develop a guidance and an instrument for standardised reporting  
9 of funding information.

10 **Results:** Of 200 trials, 178 (89%) included a funding statement, of which 171 (96%) reported  
11 being funded. Funding statements in the 171 funded trials indicated the source in 100%, amount  
12 in 1% and roles of funders in 50%. The most frequent sources were governmental (58%) and  
13 private-for-profit (40%). Of 54 funding statements in which the source was a not-for-profit  
14 organisation, we found evidence of undisclosed support of those organisations from private-for-  
15 profit organisation(s) in 26 (48%). The most frequently reported roles of funders in the 171  
16 funded trials related to study design (42%) and data analysis, interpretation, or management  
17 (41%). Of 139 RCTs addressing pharmacological or surgical interventions, 29 (21%) reported  
18 information on the supplier of the medication or device. The proposed guidance addresses both  
19 the funding information that RCTs should report and the reporting process. Attached to the  
20 guidance is a fillable PDF document for use as an instrument for standardised reporting of  
21 funding information.

22 **Conclusion:** Although the majority of RCTs report funding, there is considerable variability in  
23 the reporting of funding source, amount and roles of funders. A standardised approach to

1 reporting of funding information would address these limitations. Future research should explore  
2 the implications of funding by not-for profit organisations that are supported by for-profit  
3 organisations.

4  
5 **Strengths and limitations of this study:**

- 6 • First cross-sectional survey of a large and representative sample of clinical RCTs to  
7 describe the characteristics of the funding statements in detail.
- 8 • Provides a proposed guidance and instrument for standardised reporting of funding  
9 information.
- 10 • Use of systematic and transparent methods, e.g., duplicate and independent processes in  
11 screening and data collection.
- 12 • Includes trials limited to the clinical field and so our findings may not apply similarly to  
13 other fields such as public health research.

## 1 BACKGROUND

2 Funding sources may influence the reporting of research findings and the interpretation of  
3 results.[1-6] One study found that 86% of trial protocols documented an industry partner's right  
4 to disapprove or review proposed manuscripts.[7] This might also apply to other types of  
5 funders, for example, government. Reporting of funding in trials may appropriately influence  
6 how physicians interpret and use trial findings in clinical practice.[8, 9] The Consolidated  
7 Standards of Reporting Trials (CONSORT) checklist recognises this issue by including a section  
8 on reporting of funding.[10, 11]

9  
10 Reports in the lay media have documented how for-profit organisations support research through  
11 not-for-profit organisations.[12, 13] In one example, The Independent recently highlighted a  
12 systematic review suggesting that the consumption of low-energy sweeteners in place of sugar  
13 reduces energy intake and body weight.[14] The review authors list the International Life  
14 Sciences Institute as the study funder. While the Institute describes itself as “a nonprofit,  
15 worldwide organisation whose mission is to provide science that improves human health”, it  
16 receives funding primarily from companies such as the Coca-Cola Company, PepsiCo and  
17 Nestlé.[15] Other examples of not-for-profit organisations funded by industry and supporting  
18 research are the Sugar Association, Inc. [16, 17] and the now defunct Global Energy Balance  
19 Network.[18]

20  
21 We conducted a comprehensive review of the literature and found 22 studies that assessed  
22 reporting of funding in clinical trials (see appendix 1).[5, 19-39] The main gap we identified in  
23 this literature is a detailed and current characterisation of funding of a representative sample of



1 trials. Indeed, all of the identified studies focused on trials published in specific clinical areas or  
2 journals. Most (14, 64%) reported only on funded trials or did not differentiate between non-  
3 funded trials and those that do not report on funding. Seventeen studies (77%) did not always  
4 distinguish trials with no funding from those funded by the government or by not-for-profit  
5 sources. Moreover, these studies seldom assessed reporting on the role of funder (n=4), provision  
6 of supplies (n=2), and the amount of funding (n=0). None of the studies explored the relationship  
7 between not-for-profit organizations funding trials and for-profit organizations.

8  
9 Therefore the main objective of this study was to provide a detailed and current characterisation  
10 of funding of a representative sample of clinical trials. We also aimed to develop guidance for  
11 standardised reporting of funding information.

## 12 13 **METHODS**

### 14 **Design overview and definitions**

15 We followed systematic methodology to conduct a cross-sectional survey of published  
16 randomised controlled trials (RCTs). We define funding as any support (e.g. monetary support,  
17 provision of supplies, assistance in manuscript writing). We considered as funding statement any  
18 text in the trial report providing any information regarding the funding of the trial, including a  
19 statement of no funding. A funding statement could indicate more than one funding contribution.

### 20 21 **Eligibility criteria**

22 We included reports of studies described as RCTs comparing at least two therapeutic  
23 interventions of any type in humans and published in English. We included RCTs with cross-

1  
2  
3 1 over designs and secondary reports of trials (i.e. follow-up study; post-hoc analysis; interim  
4  
5 2 analysis; pre-specified analysis or secondary outcomes or sub-study of a trial). We excluded non-  
6  
7  
8 3 randomised trials, trials addressing basic sciences topics and non-clinical interventions, and  
9  
10 4 research letters.  
11  
12  
13 5

## 14 6 **Search strategy**

15  
16  
17 7 We searched Ovid Medline in September 2015 and limited our search to the year 2015 and the  
18  
19 8 119 Core Clinical Journals (Abridged Index Medicus (AIM)).[40] We applied the search filter  
20  
21 9 obtained from the Cochrane handbook to identify RCTs. See appendix 2 for the detailed search  
22  
23 10 strategy.  
24  
25  
26  
27 11

## 28 12 **Selection process**

29  
30  
31 13 We used an online sequence generator ([www.random.org/sequences](http://www.random.org/sequences)) to randomise the citations  
32  
33 14 captured by the search. We followed the order of the randomization list to screen citations until  
34  
35 15 we obtained 200 eligible RCTs. Our sample size allows for a narrow 95% confidence interval  
36  
37 16 (+/- 5%) around proportions of studies reporting sources of funding.  
38  
39  
40  
41 17

42  
43 18 Following calibration exercises, three reviewers (MBH, NJ, MK) worked in teams of two (MBH  
44  
45 19 was the reviewer on both) to screen titles and abstracts in duplicate and independently, using  
46  
47 20 EndNote™ X7.5 software (Thomson Reuters, Philadelphia, PA, USA). We obtained the full-  
48  
49 21 texts of citations judged as potentially eligible by either reviewer. The two teams of reviewers  
50  
51 22 screened full-texts in duplicate and independently. They resolved disagreements by discussion,  
52  
53  
54  
55  
56  
57  
58  
59  
60

1  
2  
3 1 or with the help of a third reviewer (EAA) as needed. A PRISMA study flow diagram [41]  
4  
5  
6 2 presents the results of the selection process (figure 1).  
7  
8  
9 3

#### 10 4 **Data extraction process**

11  
12  
13 5 We developed a standardised data extraction form along with specific instructions. After pilot  
14  
15 6 testing the form, we embedded it electronically into Research Electronic Data Capture  
16  
17 7 (REDCap), a secure web-based application designed to support data capture for research  
18  
19 8 studies.[42] After completing calibration exercises, nine authors divided into teams of two  
20  
21 9 extracted data in duplicate and independently (MBH was a reviewer on each of the eight teams).  
22  
23 10 Each team compared results and resolved disagreements through discussion, or with the help of a  
24  
25 11 third reviewer (EAA) as needed.  
26  
27  
28  
29  
30  
31  
32  
33

#### 34 13 **Data extracted**

35 14 We extracted the following characteristics of the RCTs:

- 36 15 • Number of trial authors;
- 37  
38 16 • Whether it is the first full-text report of the trial findings;
- 39  
40 17 • Classification of the income level of the country in which the first author's institution is  
41  
42 18 located (as high, upper-middle, lower-middle, or low income country according to the  
43  
44 19 July 2015 World Bank list of economies);
- 45  
46 20 • Type of intervention and type of control;
- 47  
48 21 • Number of randomised participants;
- 49  
50 22 • Level of risk of bias associated with allocation concealment (based on the Cochrane  
51  
52 23 Collaboration's tool for assessing risk of bias)[43];  
53  
54  
55  
56  
57  
58  
59  
60

- 1
- 2
- 3
- 4 1 • Whether authors reported conflicts of interest;
- 5
- 6 2 • Whether the report included a funding statement.
- 7
- 8 3
- 9

10 4 We then focused on trials that included funding information. We extracted the following funding

11

12

13 5 characteristics reported in the paper:

14

- 15 6 • Whether it reported funding versus no funding;
- 16
- 17
- 18 7 • The type of source(s) of funding (see appendix 3). These included internal funding (when
- 19
- 20 it is an academic or hospital affiliation) and external funding, categorized into:
- 21
- 22 government, private-for-profit, private not-for-profit with evidence of support by private-
- 23
- 24 for-profit that is a health industry, private not-for-profit with evidence of support by
- 25
- 26 private-for-profit that is not a health industry, and private not-for-profit with no evidence
- 27
- 28 of support by private-for-profit. As needed, we performed an online search to accurately
- 29
- 30 assign the type of the funding source. When a funding source was identified as a not-for-
- 31
- 32 profit organisation, we searched the organisation's website for any information on
- 33
- 34 partnership with or support from a for-profit organisation (see appendix 4 for details);
- 35
- 36
- 37 15 • Amount of funding;
- 38
- 39
- 40
- 41 17 • Whether the paper reported to be sponsored by a source different than the source of
- 42
- 43 funding/support;
- 44
- 45
- 46 19 • Whether information was reported (across the paper) on supplies in trials on
- 47
- 48 pharmacological or surgical interventions (i.e., drugs, devices, equipment, samples, or
- 49
- 50 placebos) and whether the supplier is a funding source. We looked for that information in
- 51
- 52 the funding statements, acknowledgement statements and the methods section.
- 53
- 54
- 55
- 56 23
- 57
- 58
- 59
- 60

1  
2  
3 1 Finally, and in trials that reported being funded, we assessed whether the role of funder was  
4  
5 2 explicitly reported for any funder as involved or not involved in the process of the research  
6  
7  
8 3 study.  
9  
10 4

### 11 12 5 **Data analysis**

13  
14  
15 6 We assessed agreement between reviewers of each team for inclusion of RCTs at the full-text  
16  
17 7 screening stage using chance-corrected agreement (kappa statistic). We conducted descriptive  
18  
19 8 analyses of the general characteristics of the RCT, as well as the characteristics of the funding  
20  
21 9 statement. We present summary data for categorical variables as frequencies and percentages and  
22  
23 10 for continuous variables as median and interquartile range (IQR). All calculations used SPSS,  
24  
25 11 version 21.0 for Windows (SPSS INC., Chicago, IL, USA).  
26  
27  
28  
29 12

30  
31  
32 13 Candidate independent variables for multivariable logistic regression analyses to assess the  
33  
34 14 predictors of reported funding and the role of funder included characteristics of the RCT and  
35  
36 15 variables related to Journal policy for reporting funding (i.e., journal requirement for reporting of  
37  
38 16 funding; journal requirement for reporting on the role of funder). For variables related to journal  
39  
40 17 policy for reporting funding information, we used unpublished data we had collected in mid  
41  
42 18 2014 for another cross-sectional survey.[44]  
43  
44  
45  
46 19

### 47 48 20 **Development of the guidance**

49  
50  
51 21 We used the following approach for developing the proposed guidance for standardised reporting  
52  
53 22 of funding information. First, our classification of funding sources was based on one we had  
54  
55 23 used in a previous study (governmental, private not-for-profit, and private-for-profit)[45] that we  
56  
57 24 modified after a review of relevant literature[5, 22, 27] and of journals' policies on reporting of  
58  
59  
60

1 funding information (unpublished data from another cross-sectional survey).[44] Second, we  
2 refined the classification through an iterative process of discussion and revisions based on  
3 funding statements reported in this sample of RCTs, as well as in a sample of systematic  
4 reviews.[46] Finally, we used Adobe® Acrobat XI® software to develop a fillable PDF document  
5 for use as an instrument for standardised reporting of funding information.

6  
7 The process included both in-person and email discussions among the authors of this article and  
8 feedback from external experts. The individuals involved have the following profiles: author  
9 EAA is a clinical epidemiologist and was an associate journal editor for Health and Quality of  
10 Life Outcomes journal; author GG is a clinical epidemiologist and has been a member of  
11 editorial boards of 8 journals. The external experts we consulted include Dr. Elie Al-Chaer  
12 (health researcher with a law degree and editor-in-chief of International Journal of Women's  
13 Health and Dove Press), Dr. Joerg Meerpohl (associate editor of Health and Quality of Life  
14 Outcomes journal), and Dr. Peter Tugwell (co-editor of the Journal of Clinical Epidemiology).

## 15 16 **RESULTS**

17 Figure 1 presents the study flow diagram. Agreement proved substantial ( $\kappa=0.78$ ) and near  
18 perfect ( $\kappa=0.86$ ) respectively for each of the two teams at the full-text screening stage.

### 19 20 **Characteristics of the randomised controlled trial**

21 The first authors of most trials (90%) had affiliations in high-income countries and almost half  
22 (49%) assessed pharmacological interventions (table 1). Most trials (94%) reported on conflicts

1  
2  
3  
4  
5  
6  
7  
8  
9  
10  
11  
12  
13  
14  
15  
16  
17  
18  
19  
20  
21  
22  
23  
24  
25  
26  
27  
28  
29  
30  
31  
32  
33  
34  
35  
36  
37  
38  
39  
40  
41  
42  
43  
44  
45  
46  
47  
48  
49  
50  
51  
52  
53  
54  
55  
56  
57  
58  
59  
60

1 of interest and 54% disclosed presence of conflicts of interest. Almost all (178, 89%) included a  
2 funding statement.

3

For peer review only

1 **Table 1:** General characteristics of the included randomised controlled trials (N=200)

|                                                                                                       | Overall<br>n (%) \$ |
|-------------------------------------------------------------------------------------------------------|---------------------|
| Number of trial authors; median (IQR)                                                                 | 9 (6 – 14) *        |
| Paper is the first full-text report of the trial findings                                             | 171 (86%)           |
| Classification of the income level of the country in which the first author's institution is located: |                     |
| <i>High-income</i>                                                                                    | 179 (90%)           |
| <i>Upper middle-income</i>                                                                            | 15 (8%)             |
| <i>Lower middle-income</i>                                                                            | 4 (2%)              |
| <i>Low-income</i>                                                                                     | 2 (1%)              |
| Type of intervention                                                                                  |                     |
| <i>Pharmacological</i>                                                                                | 97 (49%)            |
| <i>Surgical/invasive procedure</i>                                                                    | 42 (21%)            |
| <i>Non-invasive procedure</i>                                                                         | 11 (6%)             |
| <i>Lifestyle intervention</i>                                                                         | 15 (8%)             |
| <i>Screening/diagnostic intervention</i>                                                              | 9 (5%)              |
| <i>Psycho-therapeutic intervention</i>                                                                | 4 (2%)              |
| <i>Rehabilitation</i>                                                                                 | 6 (3%)              |
| <i>Other</i>                                                                                          | 16 (8%)             |
| Type of control                                                                                       |                     |
| <i>Active control (as opposed to non-active)</i>                                                      | 82 (41%)            |



|                                                              |                |
|--------------------------------------------------------------|----------------|
| Number of randomised participants; median (IQR)              | 160 (60 – 485) |
| Level of risk of bias associated with allocation concealment |                |
| <i>High risk</i>                                             | 4 (2%)         |
| <i>Low risk</i>                                              | 59 (30%)       |
| <i>Unclear</i>                                               | 137 (69%)      |
| Reporting of conflicts of interest                           |                |
| <i>Not reported</i>                                          | 12 (6%)        |
| <i>Reported with no conflicts of interest disclosed</i>      | 80 (40%)       |
| <i>Reported with conflicts of interest disclosed</i>         | 108 (54%)      |
| Inclusion of a funding statement                             |                |
| <i>Included (as opposed to not included)</i>                 | 178 (89%)      |

- 1  
2  
3  
4  
5  
6  
7  
8  
9  
10  
11  
12  
13  
14  
15  
16  
17  
18  
19  
20  
21  
22  
23  
24  
25  
26  
27  
28  
29  
30  
31  
32  
33  
34  
35  
36  
37  
38  
39  
40  
41  
42  
43  
44  
45  
46  
47  
48  
49  
50  
51  
52  
53  
54  
55  
56  
57  
58  
59  
60
- 1
  - 2 \$ For continuous variables, numbers refer to median (IQR); indicated in the relevant row.
  - 3 \* The number of trial authors per trial ranged between 1 and 91.

## 1 **Characteristics of the reported funding**

2 Table 2 presents the characteristics of the reported funding of the 178 trials with a funding  
3 statement, of which 171 (96%) reported being funded. The median number (IQR) of funding  
4 sources for each funded trial was 1 (1-3), with a range of 1 to 12 sources per trial. The top most  
5 frequent sources of funding were governmental (58%) and private-for-profit (40%). Of the 54  
6 funding contribution statements in which the source was identified as being a not-for-profit  
7 organisation, we found evidence of support of those organisations from private-for-profit  
8 entity(ies) in 29 (54%), of which 26 (48%) did not disclose this support in the study report.  
9 Twenty-one trials (12%) reported funding from private-for-profit in addition to another source.  
10 Two trials reported the amount of funding received. Of the 139 RCTs assessing pharmacological  
11 or surgical interventions, 29 (21%) reported information on the supplier of the medication or  
12 device.

13

1 **Table 2:** Characteristics of the funding statements included in the randomised controlled trials  
 2 (N=178 trials)

|                                                                                                            | Overall<br>n (%) |
|------------------------------------------------------------------------------------------------------------|------------------|
| Funding statement reported being:                                                                          |                  |
| <i>Funded (as opposed to not funded)</i>                                                                   | 171 (96%)        |
| Source(s) of funding (when reported as funded; N=171) \$                                                   |                  |
| <i>Internally funded</i>                                                                                   | 26 (15%)         |
| <i>Externally funded by:</i>                                                                               |                  |
| <i>Government</i>                                                                                          | 99 (58%)         |
| <i>Private-for-profit</i>                                                                                  | 68 (40%)         |
| <i>Private not-for-profit with evidence of support by private-for-profit that is a health industry</i>     | 14 (8%)          |
| <i>Private not-for-profit with evidence of support by private-for-profit that is not a health industry</i> | 15 (9%)          |
| <i>Private not-for-profit with no evidence of support by private-for-profit</i>                            | 25 (15%)         |
| Statement included amount of funding received                                                              | 2 (1%)           |
| Paper reported to be sponsored by a source different than the source of funding/support                    | 2 (1%)           |
| Paper reported information on supplies (i.e., drugs, devices, equipment, samples, or placebos) *           |                  |

|                                                            |           |
|------------------------------------------------------------|-----------|
| <i>Yes, supplied by manufacturer same as funder</i>        | 12 (9%)   |
| <i>Yes, supplied by manufacturer different than funder</i> | 17 (12%)  |
| <i>Not reported</i>                                        | 110 (79%) |

\$ More than one type could apply for trials reporting more than one source of funding.

\* Calculated using the number of trials on pharmacological interventions and surgical/invasive procedures (N=139).

For peer review only

1  
2  
3 **1 The reported roles of funders**  
4

5 2 Table 3 presents the reported roles of funders in the 171 trials that reported being funded. 85  
6  
7  
8 3 trials (50%) indicated the role of funders and provided descriptions of 22 different roles. The  
9  
10 4 most frequent roles indicated in these 85 trials were participation in the design of the study  
11  
12 5 (42%), data collection (27%), data analysis, interpretation, or management (41%), manuscript  
13  
14 6 preparation (32%), decision to submit the manuscript (15%) and conduct of the study (15%).  
15  
16  
17  
18  
19  
20  
21  
22  
23  
24  
25  
26  
27  
28  
29  
30  
31  
32  
33  
34  
35  
36  
37  
38  
39  
40  
41  
42  
43  
44  
45  
46  
47  
48  
49  
50  
51  
52  
53  
54  
55  
56  
57  
58  
59  
60

1 **Table 3:** Reporting on the roles of funders in the randomised controlled trials that reported being  
 2 funded (N=171)

|                                                              | Reported role as:     |                   | Did not report<br>role |
|--------------------------------------------------------------|-----------------------|-------------------|------------------------|
|                                                              | Not involved<br>n (%) | Involved<br>n (%) |                        |
| Any role of the below                                        | 41 (24%)              | 44 (26%)          | 86 (50%)               |
| Protocol/design of the study                                 | 41 (24%)              | 30 (18%)          | 100 (58%)              |
| Data collection                                              | 31 (18%)              | 16 (9%)           | 124 (73%)              |
| Verifying data accuracy/ fact checking                       | 0 (0%)                | 3 (2%)            | 168 (98%)              |
| Outcome adjudication                                         | 0 (0%)                | 1 (1%)            | 170 (99%)              |
| Data analysis/ interpretation/ management                    | 40 (23%)              | 31 (19%)          | 100 (58%)              |
| Funded a medical writer                                      | 1 (1%)                | 19 (11%)          | 151 (88%)              |
| Preparation of the manuscript                                | 34 (20%)              | 20 (12%)          | 117 (68%)              |
| Review of the manuscript                                     | 17 (10%)              | 7 (4%)            | 147 (86%)              |
| Approval of the manuscript                                   | 17 (10%)              | 8 (5%)            | 146 (85%)              |
| Decision to submit the manuscript                            | 18 (10%)              | 6 (4%)            | 147 (86%)              |
| Appointed an independent data and safety<br>monitoring board | 0 (0%)                | 1 (1%)            | 170 (99%)              |
| Auditing of study conduct                                    | 0 (0%)                | 3 (2%)            | 168 (98%)              |
| Management                                                   | 0 (0%)                | 3 (2%)            | 168 (98%)              |
| Team assembly                                                | 0 (0%)                | 2 (1%)            | 169 (99%)              |
| Conduct of study                                             | 13 (8%)               | 12 (7%)           | 146 (85%)              |

|                               |        |        |           |
|-------------------------------|--------|--------|-----------|
| Generated randomisation list  | 0 (0%) | 3 (2%) | 168 (98%) |
| Enrollment of participants    | 0 (0%) | 1 (1%) | 170 (99%) |
| Logistical support            | 0 (0%) | 3 (2%) | 168 (98%) |
| Holding study data            | 0 (0%) | 1 (1%) | 170 (99%) |
| Study oversight               | 0 (0%) | 2 (1%) | 169 (99%) |
| Steering committee            | 0 (0%) | 1 (1%) | 170 (99%) |
| Measurement of study variable | 0 (0%) | 5 (3%) | 166 (97%) |

1

2

1  
2  
3 **1 Results of the regression analyses**  
4

5  
6 2 Appendix 5 presents the details of the multivariable logistic regression analyses. Reporting being  
7  
8 3 funded was positively associated with two variables (table 4), based on data from all included  
9  
10 4 trials (n=200). Explicit reporting on the role of funder was positively associated with four  
11  
12 5 variables (table 4), based on data from trials reporting being funded (n=171).  
13  
14  
15  
16  
17  
18  
19  
20  
21  
22  
23  
24  
25  
26  
27  
28  
29  
30  
31  
32  
33  
34  
35  
36  
37  
38  
39  
40  
41  
42  
43  
44  
45  
46  
47  
48  
49  
50  
51  
52  
53  
54  
55  
56  
57  
58  
59  
60

For peer review only



1 **Table 4:** Results of the multivariable regression analysis

| Dependent variables                                      | Independent variables                                                                                                | Adjusted OR<br>(95% CI) | p-value |
|----------------------------------------------------------|----------------------------------------------------------------------------------------------------------------------|-------------------------|---------|
| ‘Reporting being funded’ model (N=200)                   | Journal impact factor                                                                                                | 1.43<br>(1.11 – 1.86)   | 0.006   |
|                                                          | Affiliation with an institution from a high-income country (reference category being middle or low-income countries) | 16.25<br>(4.03 – 65.5)  | <0.0001 |
| ‘Explicit reporting on the role of funder’ model (N=171) | Paper is the first reporting on the findings of the trial                                                            | 3.47<br>(1.21 – 9.96)   | 0.021   |
|                                                          | Journal impact factor                                                                                                | 1.06<br>(1.03 – 1.10)   | <0.0001 |
|                                                          | Journal requirement for reporting on the role of funder                                                              | 3.25<br>(1.43 – 7.38)   | 0.005   |
|                                                          | Funding from private-for-profit source(s) (reference category being all other types of funding sources)              | 4.9<br>(2.11 – 11.83)   | <0.0001 |

2

## 1 Proposed guidance

2 The proposed guidance provides suggestions for both funding information and the reporting  
3 process. Box 1 lists the funding information that relates to the phases of the research study for  
4 which the funding was received, the funding sources and the involvement of the funders in the  
5 process of the research study.  
6

### Box 1: Suggestions for what funding information to report

#### Funding sources (and Grant ID if applicable)

- All types of funding sources, including the following with specifications:
  - Internal funding (specifying institution)
  - Government(s) (specifying granting agency, level of government)
  - Inter-government (two or more government agencies such as the European Union)
  - Private-for-profit (listing companies/entities)
  - Private not-for-profit (listing organisations/philanthropies)
- Research phases for which funding was received: planning, conduct and/or reporting of the research study under consideration. When funding relates to provision of supplies, the appropriate answer is ‘conduct’.
- Type of funding received including monetary support, provision of supplies, etc.
- Value of monetary support and value of other supports.
- Whether the funding provided by any of the funding sources is supported by an entity other than/external to the funding source.

#### Involvement (role) of funding sources

- Involvement (role) of each funder in the process of the research study, including:
  - Study planning and conduct: design and protocol drafting, study management, participant recruitment, data collection, data management, data analysis, quality control.
  - Study reporting (manuscript): preparation, review, approval, decision to submit.
  - Authorship: authors employed by the funder.

1  
2  
3 1  
4  
5  
6 2 As for the process of reporting funding information, we suggest that the corresponding author  
7  
8 3 plays the role of the guarantor of this information (given his/her primary responsibility of  
9  
10 4 communicating with both the journal and the readers) and take responsibility for:

- 5 • Collecting funding information and filling a standardised form;
- 6 • Sending the form to all co-authors for approval and verification of accuracy and  
7 completeness of the information;
- 8 • Submitting the up-to-date form at the time of submission of the manuscript for  
9 consideration for publication;
- 10 • Updating and re-submitting the form at the time of acceptance of the manuscript for final  
11 publication.

12  
13 Appendix 6 provides a fillable PDF document for use as an instrument for standardised reporting  
14 of funding information.

## 15 16 **DISCUSSION**

### 17 **Summary of findings**

18 The objective of this study was to describe the characteristics of the funding statements in reports  
19 of clinical trials. About nine in ten trial reports included a funding statement and 96% of those  
20 statements indicated that funding existed. The latter statements specified the source, amount, and  
21 role of funders in 100%, 1%, and 50% of cases respectively. The most commonly reported  
22 sources of funding were government and private-for-profit sources. Of all funding contribution  
23 statements in which the source was identified as being a not-for-profit organisation, about half

1 related to not-for-profit organisations for which we found evidence of support by private-for-  
2 profit entity(ies). Only three of those statements disclosed the support by the private-for profit-  
3 entities. For trials of pharmacological or surgical interventions, only a fifth reported information  
4 on the supplier of the medication or device. We identified descriptions of a total of 22 different  
5 roles for the funders. Trials most frequently reported on roles related to the design of the study,  
6 data collection, data analysis, and manuscript preparation. We also propose a guidance and  
7 instrument for standardised reporting of funding information.

### 8 9 **Reporting of funding**

10 The high percentage of trials that reported being funded may be explained by the fact that  
11 conducting an RCT typically requires a large number of resources.[47-49] Also, we found a  
12 positive association between reporting being funded and affiliation with an institution from a  
13 high-income country. This may reflect better opportunities for, and higher ability of, institutions  
14 from high-income countries to obtain funding.

15  
16 Explicit reporting on the role of funder was associated with journal requirement for reporting on  
17 the role of funder. This might explain the relatively low percentage of trials that reported on the  
18 roles of funders given that only 31% of clinical journals require authors to state the role of funder  
19 (unpublished data from another cross-sectional survey [44]). Explicit reporting on the role of  
20 funder was positively associated with trial funding from private-for-profit sources. This may be  
21 due to the adherence of the industry to higher standards of reporting. Indeed, several studies  
22 found that industry-funded trials had higher quality scores as compared to trials funded by other  
23 sources.[24, 50-53]

1  
2  
3 1  
4  
5  
6 2 Both reporting being funded and explicit reporting on the role of funder were associated with  
7  
8 3 higher journal impact factor. This is consistent with our previous findings that better reporting of  
9  
10 4 authors' conflicts of interest is associated with higher journal impact factor for both systematic  
11  
12 5 reviews and trials published in Core Clinical Journals.[46, 54]  
13  
14  
15 6

16  
17 7 We found that half of not-for-profit organisations included in funding contribution statements  
18  
19 8 were supported by private-for-profit entity(ies). This is probably an underestimate due to lack of  
20  
21 9 reporting of such support by authors. This also suggests that these types of relationships are  
22  
23 10 prevalent. Indeed, one recent study found that 96 national health organisations accepted money  
24  
25 11 from the Coca-Cola Company, PepsiCo, or both,[55] with a number of these organisations  
26  
27 12 known to fund research (e.g., Juvenile Diabetes Research Foundation). This is very concerning  
28  
29 13 given that the appearance of support by a not-for-profit may portray confidence in the study  
30  
31 14 findings, in spite of the fact that the indirect for-profit support may have biased those findings.  
32  
33 15 Indeed, while we explored whether private not-for-profit organizations were supported by  
34  
35 16 private-for-profit entity(ies), this may also apply to other types of funding sources.  
36  
37  
38  
39  
40  
41  
42  
43

#### 44 **Strengths and limitations**

45  
46 19 This is the first cross-sectional survey of a large and representative sample of clinical RCTs to  
47  
48 20 describe the characteristics of the funding statements in detail. Our proposed guidance and  
49  
50 21 instrument for standardised reporting of funding information may serve researchers from  
51  
52 22 different fields of health. Moreover, they may be used for other types of research studies and  
53  
54  
55  
56  
57  
58  
59  
60

1 manuscripts and not only trials (e.g., systematic reviews). In addition, we used systematic and  
2 transparent methods for screening and data collection.

3  
4 As our study focused on clinical trials, our findings may not apply similarly to other fields, for  
5 example, health policy and systems research. While we did not conduct a formal and extensive  
6 validation of the guidance (and instrument), we believe that it has both face and content validity  
7 given that we based it on a thorough review of the related literature, on the cross-sectional survey  
8 of trials, and we revised it based on feedback from journal editors and a lawyer.

### 9 10 **Comparison to similar studies**

11 We identified 22 studies on the reporting of funding information in clinical trials (see appendix  
12 1) [5, 19-39]. While all 22 studies focused on trials published in specific clinical areas or  
13 journals, our study assessed a wide sample of clinical trials published in any of the Core Clinical  
14 Journals. None of the 22 studies looked at whether the amount of funding was reported. In fact,  
15 we found that two trials in our sample reported amount. Two out of the 22 studies assessed  
16 reporting of provision of supplies in trials published between 1987 and 1994.[34, 39] To our  
17 knowledge, our study is the first one to survey a recent sample of trials for reporting of amount  
18 of funding and information on supplies.

19  
20 Only four out of the 22 studies assessed reporting on the roles of funders.[20, 22, 28, 36].  
21 Whereas these studies assessed this in industry-funded or partially industry-funded trials, we  
22 assessed this across all types of funders. For example, we found that 44% of trials funded solely  
23 by governmental sources reported on the role of funder. Example statements from those that

1 reported involvement of the government as a funder include: “appointed an independent data and  
2 safety monitoring board”, “had input into the study design and data interpretation” and  
3 “reviewed and approved the report”.

4  
5 Our previous study on clinical systematic reviews found that a third of systematic reviews did  
6 not report on funding or reported no funding in comparison to 15% of trials in this study.[46]  
7 When the included systematic reviews reported being funded, the most commonly reported  
8 sources of funding were internal funding and government (52% and 67% respectively). While  
9 only 2% of clinical systematic reviews reported funding from private-for-profit sources, we  
10 found that 40% of clinical trials reported such funding. Moreover, trials were twice more likely  
11 than systematic reviews to report on not-for-profit as their funding source (32% and 16%  
12 respectively). While half of funded trials reported on the role of the funder, a quarter of funded  
13 systematic reviews did so.

14  
15 In comparison to the Standard Protocol Items: Recommendations for Interventional Trials  
16 (SPIRIT)[56, 57] and the CONSORT checklist sections on funding,[10, 11] our guidance  
17 provides more detailed and specific recommendations for the reporting of funding information  
18 and includes detailed definitions and examples of types of funders. It also includes a clear  
19 classification of roles in which funders may be involved in the process of the trial. Whereas the  
20 International Committee of Medical Journal Editors (ICMJE) conflict of interest disclosure form  
21 includes a section for the reporting of “financial support”, the questions and options that follow  
22 imply types of financial conflicts of interest for each individual author rather than the study’s  
23 funding.[58]

1

## 2 **Implications for practice**

3 Our proposed guidance may help with clearer and more detailed reporting of the characteristics  
4 of funding in trials. This may in turn help readers and systematic reviewers better assess the  
5 significance of the funding and how it might affect the credibility of findings.[8, 59] Specifically,  
6 we recommend that trial authors explicitly report more details on the funders, whether they are  
7 supported by for-profit organisations, the provision of drugs and equipment,[11] and on the role  
8 of funders.[20, 22, 28, 36] We suggest that authors do not to report funding information (i.e.,  
9 grants received for the conduct of the study) in both the funding section and the conflict of  
10 interest section of the manuscript, but only in the former one. Also, our findings have  
11 implications for reporting statements (such as SPIRIT and CONSORT) for improving the  
12 reporting of funding information.

13

## 14 **Implications for future research**

15 Future research should further explore the issue of funding of not-for profit organisations by for-  
16 profit organisations and the role of the latter in the planning, conduct and reporting of research  
17 studies. Future research could also assess for the accuracy and completeness of reporting of trial  
18 funding and roles of funders. Moreover, it would be interesting to explore reporting of funding in  
19 primary studies of other research fields (e.g., health policy and systems), especially that roles of  
20 funders may vary from those described in clinical trials. Finally, our proposed guidance and  
21 instrument for the standardised reporting of funding information would benefit from formal and  
22 extensive validation.

23



1  
2  
3 1  
4  
5  
6 2 **FIGURES**  
7  
8 3 **Figure 1:** Study flow diagram  
9  
10 4  
11  
12  
13 5 **SUPPLEMENTARY FILE**  
14  
15 6 **Appendix 1:** Comparative chart including 23 related surveys of reporting of funding information  
16  
17 in trials  
18  
19  
20 8 **Appendix 2:** Search strategy  
21  
22 9 **Appendix 3:** Types of funding sources  
23  
24 10 **Appendix 4:** Process followed to verify whether a private not-for-profit organisation was  
25  
26 supported by a private-for-profit entity  
27  
28  
29 12 **Appendix 5:** Details of the multivariable logistic regression analyses  
30  
31  
32 13 **Appendix 6:** Instrument for reporting of funding information  
33  
34 14  
35  
36  
37  
38  
39  
40  
41  
42  
43  
44  
45  
46  
47  
48  
49  
50  
51  
52  
53  
54  
55  
56  
57  
58  
59  
60

## 1 **ACKNOWLEDGEMENTS**

2 We thank Dr. Elie Al-Chaer, Dr. Joerg Meerpohl and Dr. Peter Tugwell for their expert opinion  
3 and constructive feedback on the proposed guidance and instrument for standardised reporting of  
4 funding information. We also thank the reviewers whose suggestions helped improve this  
5 manuscript.

## 7 **CONTRIBUTIONS**

8 MBH, GG, and EAA conceived and designed the study. MBH coordinated the study throughout.  
9 EAA had full access to all of the data in the study and takes responsibility for the integrity of the  
10 data and the accuracy of the data analysis. MBH, NJ, and MK screened papers for inclusion.  
11 MBH, NJ, EAA-J, DJH, EAA-J, LCL, MZH, MA-G, and SA extracted the data. MBH and EAA  
12 analysed and interpreted the data. MBH wrote the first draft of the manuscript with EAA. MBH  
13 and EAA developed the first draft of the fillable PDF document. All authors critically revised the  
14 manuscript and approved the final version. The lead author EAA affirms that this manuscript is  
15 an honest, accurate and transparent account of the study being reported; that no important aspects  
16 of the study have been omitted; and that any discrepancies from the study as planned have been  
17 explained.

## 19 **COMPETING INTERESTS**

20 All authors have completed the ICMJE uniform disclosure form at  
21 [http://www.icmje.org/coi\\_disclosure.pdf](http://www.icmje.org/coi_disclosure.pdf) and declare no conflicts of interest.

## 23 **FUNDING**

1  
2  
3 1 This project was funded by the American University of Beirut Faculty of Medicine's Medical  
4  
5 2 Practice Plan (MPP) funds. The funder had no role in the design and conduct of the study;  
6  
7  
8 3 collection, management, analysis, and interpretation of the data; preparation, review, or approval  
9  
10 4 of the manuscript; and decision to submit the manuscript for publication. The authors and their  
11  
12 5 contributions to the manuscript are independent from the funder.  
13  
14  
15 6  
16  
17  
18 7 **ETHICAL APPROVAL**  
19  
20 8 Not required.  
21  
22 9  
23  
24 10 **DATA SHARING**  
25  
26  
27 11 Data available upon request.  
28  
29 12  
30  
31  
32  
33  
34  
35  
36  
37  
38  
39  
40  
41  
42  
43  
44  
45  
46  
47  
48  
49  
50  
51  
52  
53  
54  
55  
56  
57  
58  
59  
60

## REFERENCES

1. Amiri, A.R., K. Kanesalingam, S. Cro, et al., Does source of funding and conflict of interest influence the outcome and quality of spinal research? *Spine J*, 2014;14(2):308-14.
2. Bartels, R.H., H. Delye and J. Boogaarts, Financial disclosures of authors involved in spine research: an underestimated source of bias. *Eur Spine J*, 2012;21(7):1229-33.
3. Crocetti, M.T., D.D. Amin and R. Scherer, Assessment of risk of bias among pediatric randomized controlled trials. *Pediatrics*, 2010;126(2):298-305.
4. Lundh, A., J. Lexchin, B. Mintzes, et al., Industry sponsorship and research outcome. *Cochrane Database Syst Rev*, 2017;2:MR000033.
5. Mugambi, M.N., A. Musekiwa, M. Lombard, et al., Association between funding source, methodological quality and research outcomes in randomized controlled trials of synbiotics, probiotics and prebiotics added to infant formula: a systematic review. *BMC Med Res Methodol*, 2013;13:137.
6. Riaz, H., S. Raza, M.S. Khan, et al., Impact of Funding Source on Clinical Trial Results Including Cardiovascular Outcome Trials. *Am J Cardiol*, 2015;116(12):1944-7.
7. Kasenda, B., E. von Elm, J.J. You, et al., Agreements between Industry and Academia on Publication Rights: A Retrospective Study of Protocols and Publications of Randomized Clinical Trials. *PLoS Med*, 2016;13(6):e1002046.
8. Kesselheim, A.S., C.T. Robertson, J.A. Myers, et al., A randomized study of how physicians interpret research funding disclosures. *N Engl J Med*, 2012;367(12):1119-27.
9. Coultas, D., Ethical considerations in the interpretation and communication of clinical trial results. *Proc Am Thorac Soc*, 2007;4(2):194-8; discussion 198-9.
10. Schulz, K.F., D.G. Altman, D. Moher, et al., CONSORT 2010 Statement: Updated guidelines for reporting parallel group randomised trials. *J Clin Epidemiol*, 2010;63(8):834-40.
11. Moher, D., S. Hopewell, K.F. Schulz, et al., CONSORT 2010 Explanation and Elaboration: Updated guidelines for reporting parallel group randomised trials. *J Clin Epidemiol*, 2010;63(8):e1-37.
12. The Independent. A recent study that said Diet Coke can help you lose weight was quietly funded by Coca-Cola, Sunday 17 January 2016. Available from: <http://www.independent.co.uk/news/science/study-that-said-diet-fizzy-drinks-can-help-weight-loss-was-quietly-funded-by-coca-cola-and-pepsi-a6817686.html>.
13. The New York Times. Coca-Cola Funds Scientists Who Shift Blame for Obesity Away From Bad Diets, August 9, 2015. Available from: [http://well.blogs.nytimes.com/2015/08/09/coca-cola-funds-scientists-who-shift-blame-for-obesity-away-from-bad-diets/?\\_r=0](http://well.blogs.nytimes.com/2015/08/09/coca-cola-funds-scientists-who-shift-blame-for-obesity-away-from-bad-diets/?_r=0).
14. Rogers, P.J., P.S. Hogenkamp, C. de Graaf, et al., Does low-energy sweetener consumption affect energy intake and body weight? A systematic review, including meta-analyses, of the evidence from human and animal studies. *Int J Obes (Lond)*, 2016;40(3):381-94.
15. International Life Sciences Institute. Mission & Operating Principles. 2016; Available from: <http://ilsi.org/about/mission/>.

16. The Sugar Association, I. Research. [accessed on November 15, 2016]; Available from: <https://www.sugar.org/research/>.
17. Kearns, C.E., L.A. Schmidt and S.A. Glantz, Sugar Industry and Coronary Heart Disease Research: A Historical Analysis of Internal Industry Documents. *JAMA Intern Med*, 2016;176(11):1680-1685.
18. Kmietowicz, Z., Coca-Cola funded group set up to promote "energy balance" is disbanded. *BMJ*, 2015;351:h6590.
19. Als-Nielsen, B., W. Chen, C. Gluud, et al., Association of funding and conclusions in randomized drug trials: a reflection of treatment effect or adverse events? *JAMA*, 2003;290(7):921-8.
20. Bero, L., F. Oostvogel, P. Bacchetti, et al., Factors associated with findings of published trials of drug-drug comparisons: why some statins appear more efficacious than others. *PLoS Med*, 2007;4(6):e184.
21. Bhandari, M., J.W. Busse, D. Jackowski, et al., Association between industry funding and statistically significant pro-industry findings in medical and surgical randomized trials. *CMAJ*, 2004;170(4):477-80.
22. Bridoux, V., G. Moutel, L. Schwarz, et al., Disclosure of funding sources and conflicts of interest in phase III surgical trials: survey of ten general surgery journals. *World J Surg*, 2014;38(10):2487-93.
23. Clifford, T.J., N.J. Barrowman and D. Moher, Funding source, trial outcome and reporting quality: are they related? Results of a pilot study. *BMC Health Serv Res*, 2002;2(1):18.
24. Djulbegovic, B., M. Lacey, A. Cantor, et al., The uncertainty principle and industry-sponsored research. *Lancet*, 2000;356(9230):635-8.
25. Etter, J.F., M. Burri and J. Stapleton, The impact of pharmaceutical company funding on results of randomized trials of nicotine replacement therapy for smoking cessation: a meta-analysis. *Addiction*, 2007;102(5):815-22.
26. Hodgson, R., R. Allen, E. Broderick, et al., Funding source and the quality of reports of chronic wounds trials: 2004 to 2011. *Trials*, 2014;15:19.
27. Khan, N.A., J.I. Lombeida, M. Singh, et al., Association of industry funding with the outcome and quality of randomized controlled trials of drug therapy for rheumatoid arthritis. *Arthritis Rheum*, 2012;64(7):2059-67.
28. Lundh, A., L.T. Krogsboll and P.C. Gotzsche, Sponsors' participation in conduct and reporting of industry trials: a descriptive study. *Trials*, 2012;13:146.
29. Momeni, A., A. Becker, H. Bannasch, et al., Association between research sponsorship and study outcome in plastic surgery literature. *Ann Plast Surg*, 2009;63(6):661-4.
30. Montgomery, J.H., M. Byerly, T. Carmody, et al., An analysis of the effect of funding source in randomized clinical trials of second generation antipsychotics for the treatment of schizophrenia. *Control Clin Trials*, 2004;25(6):598-612.
31. Peppercorn, J., E. Blood, E. Winer, et al., Association between pharmaceutical involvement and outcomes in breast cancer clinical trials. *Cancer*, 2007;109(7):1239-46.
32. Perlis, C.S., M. Harwood and R.H. Perlis, Extent and impact of industry sponsorship conflicts of interest in dermatology research. *J Am Acad Dermatol*, 2005;52(6):967-71.

- 1  
2  
3  
4  
5  
6  
7  
8  
9  
10  
11  
12  
13  
14  
15  
16  
17  
18  
19  
20  
21  
22  
23  
24  
25  
26  
27  
28  
29  
30  
31  
32  
33  
34  
35  
36  
37  
38  
39  
40  
41  
42  
43  
44  
45  
46  
47  
48  
49  
50  
51  
52  
53  
54  
55  
56  
57  
58  
59  
60
33. Ridker, P.M. and J. Torres, Reported outcomes in major cardiovascular clinical trials funded by for-profit and not-for-profit organizations: 2000-2005. *JAMA*, 2006;295(19):2270-4.
  34. Rochon, P.A., J.H. Gurwitz, R.W. Simms, et al., A study of manufacturer-supported trials of nonsteroidal anti-inflammatory drugs in the treatment of arthritis. *Arch Intern Med*, 1994;154(2):157-63.
  35. Shah, R.V., T.J. Albert, V. Bruegel-Sanchez, et al., Industry support and correlation to study outcome for papers published in Spine. *Spine (Phila Pa 1976)*, 2005;30(9):1099-104; discussion 1105.
  36. Tuech, J.J., G. Moutel, P. Pessaux, et al., Disclosure of competing financial interests and role of sponsors in phase III cancer trials. *Eur J Cancer*, 2005;41(15):2237-40.
  37. Tungaraza, T. and R. Poole, Influence of drug company authorship and sponsorship on drug trial outcomes. *Br J Psychiatry*, 2007;191:82-3.
  38. Voineskos, S.H., C.J. Coroneos, N.I. Ziolkowski, et al., A Systematic Review of Surgical Randomized Controlled Trials: Part 2. Funding Source, Conflict of Interest, and Sample Size in Plastic Surgery. *Plast Reconstr Surg*, 2016;137(2):453e-461e.
  39. Yaphe, J., R. Edman, B. Knishkowsky, et al., The association between funding by commercial interests and study outcome in randomized controlled drug trials. *Fam Pract*, 2001;18(6):565-8.
  40. U.S. National Library of Medicine. Abridged Index Medicus (AIM or "Core Clinical") Journal Titles. 2016 [accessed on May 02, 2017]; Available from: <https://www.nlm.nih.gov/bsd/aim.html>.
  41. Moher, D., A. Liberati, J. Tetzlaff, et al., Preferred reporting items for systematic reviews and meta-analyses: the PRISMA Statement. *Open Med*, 2009;3(3):e123-30.
  42. Harris, P.A., R. Taylor, R. Thielke, et al., Research electronic data capture (REDCap) - A metadata-driven methodology and workflow process for providing translational research informatics support. *J Biomed Inform.*, 2009, Apr;42(2):377-81.
  43. Higgins, J.P. and S. Green, *Cochrane Handbook for Systematic Reviews of Interventions. Table 8.5.d: Criteria for judging risk of bias in the 'Risk of bias' assessment tool*. 2011: The Cochrane Collaboration. Available from <http://handbook.cochrane.org>.
  44. Shawwa, K., R. Kallas, S. Koujanian, et al., Requirements of Clinical Journals for Authors' Disclosure of Financial and Non-Financial Conflicts of Interest: A Cross Sectional Study. *PLoS One*, 2016;11(3):e0152301.
  45. Akl, E.A., A. Carrasco-Labra, R. Brignardello-Petersen, et al., Reporting, handling and assessing the risk of bias associated with missing participant data in systematic reviews: a methodological survey. *BMJ Open*, 2015;5(9):e009368.
  46. Hakoum, M.B., S. Anouti, M. Al-Gibbawi, et al., Reporting of financial and non-financial conflicts of interest by authors of systematic reviews: a methodological survey. *BMJ Open*, 2016;6(8):e011997.
  47. Glass, H.E. and K. Hollander, Managing clinical grant costs. *Contemp Clin Trials*, 2009;30(3):221-6.
  48. Idoko, O.T., S. Kochhar, T.E. Agbenyega, et al., Impact, challenges, and future projections of vaccine trials in Africa. *Am J Trop Med Hyg*, 2013;88(3):414-9.

- 1  
2  
3  
4  
5  
6  
7  
8  
9  
10  
11  
12  
13  
14  
15  
16  
17  
18  
19  
20  
21  
22  
23  
24  
25  
26  
27  
28  
29  
30  
31  
32  
33  
34  
35  
36  
37  
38  
39  
40  
41  
42  
43  
44  
45  
46  
47  
48  
49  
50  
51  
52  
53  
54  
55  
56  
57  
58  
59  
60
49. Ravinetto, R., K. De Nys, M. Boelaert, et al., Sponsorship in non-commercial clinical trials: definitions, challenges and the role of Good Clinical Practices guidelines. *BMC Int Health Hum Rights*, 2015;15:34.
  50. Pengel, L.H., L. Barcena and P.J. Morris, The quality of reporting of randomized controlled trials in solid organ transplantation. *Transpl Int*, 2009;22(4):377-84.
  51. Rios, L.P., A. Oduyungbo, M.O. Moitri, et al., Quality of reporting of randomized controlled trials in general endocrinology literature. *J Clin Endocrinol Metab*, 2008;93(10):3810-6.
  52. Yuen, S.Y. and J.E. Pope, Learning from past mistakes: assessing trial quality, power and eligibility in non-renal systemic lupus erythematosus randomized controlled trials. *Rheumatology (Oxford)*, 2008;47(9):1367-72.
  53. Lexchin, J., L.A. Bero, B. Djulbegovic, et al., Pharmaceutical industry sponsorship and research outcome and quality: systematic review. *BMJ*, 2003;326(7400):1167-70.
  54. Hakoum, M.B., N. Jouni, E.A. Abou-Jaoude, et al., Authors of Clinical Trials Reported Individual and Financial Conflicts of Interest More Frequently than Institutional and non-financial Ones: a Methodological Survey. *J Clin Epidemiol*, 2017.
  55. Aaron, D.G. and M.B. Siegel, Sponsorship of National Health Organizations by Two Major Soda Companies. *Am J Prev Med*, 2016.
  56. Chan, A.W., J.M. Tetzlaff, D.G. Altman, et al., SPIRIT 2013 statement: defining standard protocol items for clinical trials. *Ann Intern Med*, 2013;158(3):200-7.
  57. Chan, A.W., J.M. Tetzlaff, P.C. Gotzsche, et al., SPIRIT 2013 explanation and elaboration: guidance for protocols of clinical trials. *BMJ*, 2013;346:e7586.
  58. International Committee of Medical Journal Editors. Conflict of Interest Disclosure Forms. [accessed on May 03, 2017]; Available from: <http://www.icmje.org/about-icmje/fags/conflict-of-interest-disclosure-forms/>.
  59. Elia, N., E. von Elm, A. Chatagner, et al., How do authors of systematic reviews deal with research malpractice and misconduct in original studies? A cross-sectional analysis of systematic reviews and survey of their authors. *BMJ Open*, 2016;6(3):e010442.

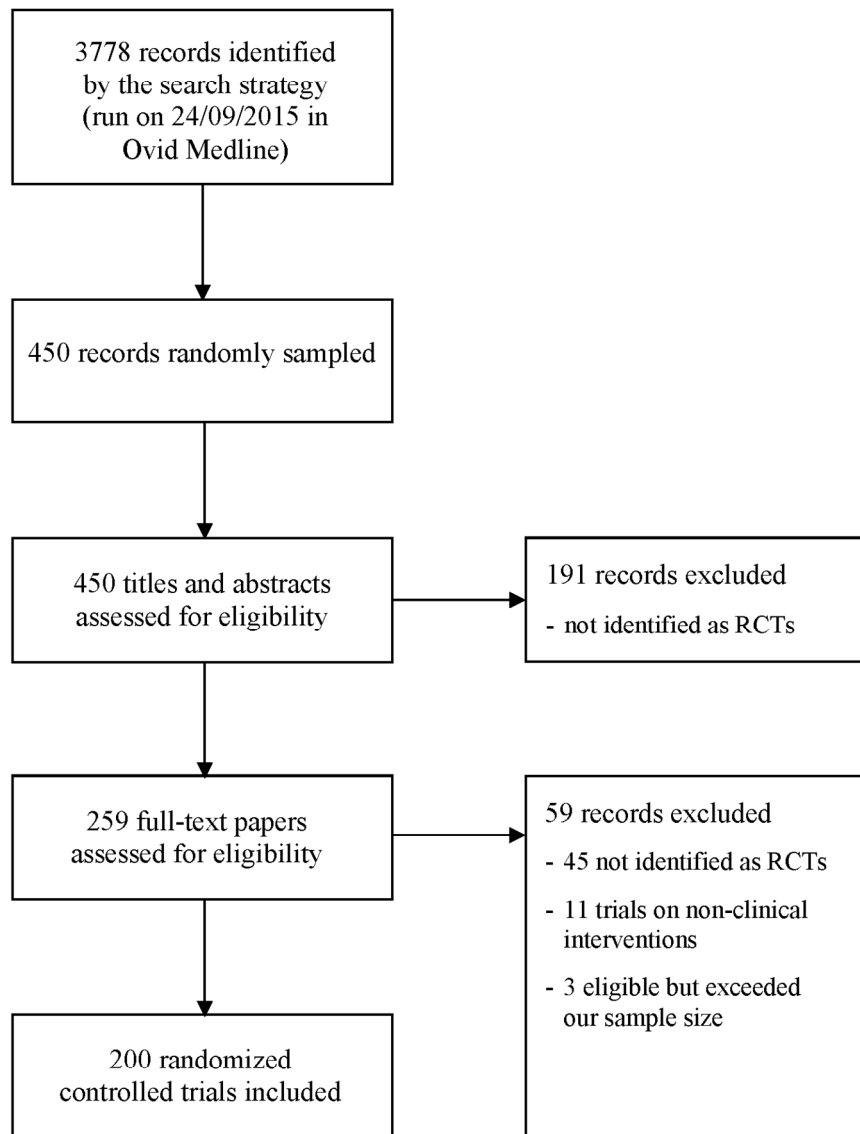

Figure 1: Study flow diagram

130x165mm (300 x 300 DPI)



## APPENDICES

## Appendix 1: Comparative chart including 23 related surveys of reporting of funding information in trials

| Survey                | Eligibility criteria                                                            | Number of trials | Year of trial publication | Characteristics of funding statement assessed in the survey                                                                               | Main findings                                                                                                                                                                              |
|-----------------------|---------------------------------------------------------------------------------|------------------|---------------------------|-------------------------------------------------------------------------------------------------------------------------------------------|--------------------------------------------------------------------------------------------------------------------------------------------------------------------------------------------|
| Als-Nielsen 2003 [19] | RCTs included in eligible meta-analyses in Cochrane reviews                     | 370              | 1971 - 2000               | - Source of funding                                                                                                                       | Funding was not reported in 29%. 39% were funded by for-profit organisations.                                                                                                              |
| Etter 2007 [25]       | RCTs on nicotine replacement therapy in Cochrane review                         | 90               | 1979 - 2003               | - Source of funding                                                                                                                       | 54% received pharmaceutical company support. 46% showed no evidence of pharmaceutical company support.                                                                                     |
| Mugambi 2013 [5]      | RCTs on infant formula supplementation of symbiotics, probiotics, or prebiotics | 67               | 1980 - 2012               | - Source of funding                                                                                                                       | 60% were funded by food industry. 24% did not specify their source of funding.                                                                                                             |
| Rochon 1994 [34]      | Manufacturer-associated RCTs of NSAIDs listed in MEDLINE                        | 52               | 1987 - 1990               | - Grant support<br>- Pharmaceutical authorship<br>- Provision of supplies<br>- Published in a pharmaceutical sponsored journal supplement | 19% reported grant support. 36.5% reported pharmaceutical authorship. 13.5% reported that manufacturer supplied drug. 31% were published in a pharmaceutical sponsored journal supplement. |
| Momeni 2008 [29]      | Trials published in 4 major plastic surgery journals                            | 346              | 1990 - 2005               | - Source of funding                                                                                                                       | 20% reported on financial support, of which 60% were supported by industrial sponsorship.                                                                                                  |

|                                      |                          |                                                                               |     |                     |                                                                                  |                                                                                                                                                                             |
|--------------------------------------|--------------------------|-------------------------------------------------------------------------------|-----|---------------------|----------------------------------------------------------------------------------|-----------------------------------------------------------------------------------------------------------------------------------------------------------------------------|
| 1<br>2<br>3<br>4<br>5<br>6<br>7<br>8 | Yaphe<br>2001 [39]       | RCTs of drugs or food<br>products published in 5<br>medical journals          | 314 | 1992 - 1994         | - Source of funding<br>- Pharmaceutical<br>authorship<br>- Provision of supplies | 68% received pharmaceutical industry<br>support.<br>33% received support as manpower<br>(authorship or statistical help).<br>21% received support as supply of drugs.       |
| 9<br>10<br>11<br>12<br>13            | Peppercorn<br>2007 [31]  | Breast cancer clinical trials<br>published in 10 medical<br>journals          | 140 | 1993, 1998,<br>2003 | - Source of funding<br>- Pharmaceutical<br>authorship                            | 48% were categorised as pharmaceutical<br>studies.<br>26% reported pharmaceutical industry<br>authorship.                                                                   |
| 14<br>15<br>16<br>17<br>18           | Bero<br>2007 [20]        | Reports of RCTs comparing<br>statin drugs                                     | 192 | 1995 - 2005         | - Source of funding<br>- Role of funder                                          | 39% had no disclosure or no funding.<br>49% disclosed funding from industry, of<br>which 21% disclosed the role of the<br>sponsor.                                          |
| 19<br>20<br>21                       | Djulbegovic<br>2000 [24] | RCTs for multiple myeloma                                                     | 130 | 1996 - 1998         | - Source of funding                                                              | 26% reported funding solely or in part by<br>commercial organisations.                                                                                                      |
| 22<br>23<br>24<br>25                 | Clifford<br>2002 [23]    | RCTs published in 5 high<br>impact factor general<br>medical journals         | 100 | 1999 - 2000         | - Source of funding                                                              | 94% were funded, of which 66% were<br>funded in whole or in part by industry.<br>6% did not disclose their source of<br>funding.                                            |
| 26<br>27<br>28<br>29                 | Bhandari<br>2004 [21]    | RCTs published in 8<br>surgical and 5 medical<br>journals                     | 332 | 1999 - 2001         | - Source of funding                                                              | 44% had no reported funding.<br>37% reported funding by industry.                                                                                                           |
| 30<br>31<br>32<br>33<br>34<br>35     | Tuech<br>2005 [36]       | Phase III cancer RCTs<br>published in 12 journals                             | 655 | 1999 - 2003         | - Source of funding<br>- Role of funder                                          | 35% were industry-sponsored, of which<br>18% reported the role of the study<br>sponsor.<br>21% did not disclose funding and only 1<br>trial disclosed no financial support. |
| 36<br>37<br>38                       | Shah<br>2005 [35]        | Articles published in the<br>Spine journal                                    | 34  | 2000 - 2003         | - Source of funding                                                              | 23% were industry funded.                                                                                                                                                   |
| 39<br>40<br>41<br>42                 | Tungaraza<br>2007 [37]   | Original papers on<br>psychiatric drug treatment<br>published in two journals | 132 | 2000 - 2004         | - Source of funding<br>- Pharmaceutical<br>authorship                            | 85% were industry-funded.<br>40% were industry-authored studies.                                                                                                            |

43  
44  
45  
46  
47  
48  
49

|                               |                                                                                                                                                  |     |                            |                                         |                                                                                                                                                                |
|-------------------------------|--------------------------------------------------------------------------------------------------------------------------------------------------|-----|----------------------------|-----------------------------------------|----------------------------------------------------------------------------------------------------------------------------------------------------------------|
| Ridker<br>2006 [33]           | Cardiovascular medicine<br>RCTs published in 3<br>medical journals                                                                               | 349 | 2000 - 2005                | - Source of funding                     | 31% were financed by not-for-profit<br>organisations, 44% by for-profit<br>manufacturers, and 19% by both.<br>6% noted no source of funding.                   |
| Voineskos<br>2016 [38]        | Surgical RCTs                                                                                                                                    | 173 | 2000 - 2013                | - Source of funding                     | 58% did not acknowledge a source of<br>funding.<br>14% reported funding from for-profit<br>sources.<br>10% explicitly reported 'no funding<br>received'.       |
| Montogom<br>-ery<br>2004 [30] | RCTs on second generation<br>antipsychotics for the<br>management of<br>schizophrenia                                                            | 86  | 2002                       | - Source of funding                     | 84% were industry-funded.<br>16% were non-industry-funded.                                                                                                     |
| Perlis<br>2005 [32]           | RCTs published in one of<br>the four dermatology<br>journals with the highest<br>science citation impact<br>factor scores and total<br>citations | 179 | 2002                       | - Source of funding                     | 57% reported receiving at least some<br>industry support.<br>26% had no information about funding.                                                             |
| Khan<br>2012 [27]             | RCTs of drug therapy for<br>rheumatoid arthritis                                                                                                 | 103 | 2002 – 2003<br>2006 - 2007 | - Source of funding                     | 62% had complete or partial industry<br>funding.<br>19% had an unspecified funding source.                                                                     |
| Hodgson<br>2014 [26]          | RCTs in chronic wound care                                                                                                                       | 167 | 2004 - 2011                | - Source of funding                     | 35% were reported as having been<br>commercially funded.<br>26% either did not report the source of<br>funding or the status of funding source<br>was unclear. |
| Bridoux<br>2014 [22]          | Surgical trials published in<br>10 surgery journals with<br>impact factor >2                                                                     | 657 | 2005 - 2010                | - Source of funding<br>- Role of funder | 47% disclosed funding.<br>Of those, 39% reported funding from<br>industry or mixed funding, of which 35%<br>reported the role of study sponsor.                |

|                 |                                                                                                       |     |             |                                                                                                                                                    |                                                                                                                                                                                                                                                                                                                                                                                                                                                                                                        |
|-----------------|-------------------------------------------------------------------------------------------------------|-----|-------------|----------------------------------------------------------------------------------------------------------------------------------------------------|--------------------------------------------------------------------------------------------------------------------------------------------------------------------------------------------------------------------------------------------------------------------------------------------------------------------------------------------------------------------------------------------------------------------------------------------------------------------------------------------------------|
| Lundh 2012 [28] | RCTs published in The Lancet and fully funded by a drug or device company                             | 69  | 2008 - 2009 | - Role of funder                                                                                                                                   | <p>Sponsor had a role in:</p> <ul style="list-style-type: none"> <li>Review and verification of information (71%)</li> <li>Entry of data into the study database (75%)</li> <li>Data storage (64%)</li> <li>Data analysis (58%)</li> <li>Coordinating writing of the manuscript (35%)</li> <li>Medical writing assistance (54%)</li> <li>Protocol writing (99%)</li> <li>Co-authorship (81%)</li> <li>Publication of results through co-authorship or approval/review of the paper (93%)</li> </ul>    |
| Current survey  | RCTs published in any of the 119 Core Clinical Journals, not restricted to a specific clinical domain | 200 | 2015        | <ul style="list-style-type: none"> <li>- Source of funding</li> <li>- Amount</li> <li>- Provision of supplies</li> <li>- Role of funder</li> </ul> | <p>89% included a funding statement, of which 96% reported being funded.</p> <p>Of the funded trials (N=171):</p> <ul style="list-style-type: none"> <li>- 100% specified the source;</li> <li>- 40% received funding from private-for-profit sources;</li> <li>- 1% reported the amount of funding;</li> <li>- 21% of pharmacological/surgical trials (N=139) reported information on supplies.</li> <li>- 50% reported on the roles of funders (26% as involved and 24% as not involved).</li> </ul> |

RCT: randomised controlled trial

References of studies included in Table 1  
(in order of appearance in the manuscript)

5. Mugambi, M.N., A. Musekiwa, M. Lombard, et al., Association between funding source, methodological quality and research outcomes in randomized controlled trials of synbiotics, probiotics and prebiotics added to infant formula: a systematic review. *BMC Med Res Methodol*, 2013;13:137.
19. Als-Nielsen, B., W. Chen, C. Gluud, et al., Association of funding and conclusions in randomized drug trials: a reflection of treatment effect or adverse events? *JAMA*, 2003;290(7):921-8.
20. Bero, L., F. Oostvogel, P. Bacchetti, et al., Factors associated with findings of published trials of drug-drug comparisons: why some statins appear more efficacious than others. *PLoS Med*, 2007;4(6):e184.
21. Bhandari, M., J.W. Busse, D. Jackowski, et al., Association between industry funding and statistically significant pro-industry findings in medical and surgical randomized trials. *CMAJ*, 2004;170(4):477-80.
22. Bridoux, V., G. Moutel, L. Schwarz, et al., Disclosure of funding sources and conflicts of interest in phase III surgical trials: survey of ten general surgery journals. *World J Surg*, 2014;38(10):2487-93.
23. Clifford, T.J., N.J. Barrowman and D. Moher, Funding source, trial outcome and reporting quality: are they related? Results of a pilot study. *BMC Health Serv Res*, 2002;2(1):18.
24. Djulbegovic, B., M. Lacey, A. Cantor, et al., The uncertainty principle and industry-sponsored research. *Lancet*, 2000;356(9230):635-8.
25. Etter, J.F., M. Burri and J. Stapleton, The impact of pharmaceutical company funding on results of randomized trials of nicotine replacement therapy for smoking cessation: a meta-analysis. *Addiction*, 2007;102(5):815-22.
26. Hodgson, R., R. Allen, E. Broderick, et al., Funding source and the quality of reports of chronic wounds trials: 2004 to 2011. *Trials*, 2014;15:19.
27. Khan, N.A., J.I. Lombeida, M. Singh, et al., Association of industry funding with the outcome and quality of randomized controlled trials of drug therapy for rheumatoid arthritis. *Arthritis Rheum*, 2012;64(7):2059-67.
28. Lundh, A., L.T. Krogsboll and P.C. Gotzsche, Sponsors' participation in conduct and reporting of industry trials: a descriptive study. *Trials*, 2012;13:146.
29. Momeni, A., A. Becker, H. Bannasch, et al., Association between research sponsorship and study outcome in plastic surgery literature. *Ann Plast Surg*, 2009;63(6):661-4.
30. Montgomery, J.H., M. Byerly, T. Carmody, et al., An analysis of the effect of funding source in randomized clinical trials of second generation antipsychotics for the treatment of schizophrenia. *Control Clin Trials*, 2004;25(6):598-612.
31. Peppercorn, J., E. Blood, E. Winer, et al., Association between pharmaceutical involvement and outcomes in breast cancer clinical trials. *Cancer*, 2007;109(7):1239-46.
32. Perlis, C.S., M. Harwood and R.H. Perlis, Extent and impact of industry sponsorship conflicts of interest in dermatology research. *J Am Acad Dermatol*, 2005;52(6):967-71.
33. Ridker, P.M. and J. Torres, Reported outcomes in major cardiovascular clinical trials funded by for-profit and not-for-profit organizations: 2000-2005. *JAMA*, 2006;295(19):2270-4.
34. Rochon, P.A., J.H. Gurwitz, R.W. Simms, et al., A study of manufacturer-supported trials of nonsteroidal anti-inflammatory drugs in the treatment of arthritis. *Arch Intern Med*, 1994;154(2):157-63.
35. Shah, R.V., T.J. Albert, V. Bruegel-Sanchez, et al., Industry support and correlation to study outcome for papers published in *Spine*. *Spine (Phila Pa 1976)*, 2005;30(9):1099-104; discussion 1105.
36. Tuech, J.J., G. Moutel, P. Pessaux, et al., Disclosure of competing financial interests and role of sponsors in phase III cancer trials. *Eur J Cancer*, 2005;41(15):2237-40.
37. Tungaraza, T. and R. Poole, Influence of drug company authorship and sponsorship on drug trial outcomes. *Br J Psychiatry*, 2007;191:82-3.
38. Voineskos, S.H., C.J. Coroneos, N.I. Ziolkowski, et al., A Systematic Review of Surgical Randomized Controlled Trials: Part 2. Funding Source, Conflict of Interest, and Sample Size in Plastic Surgery. *Plast Reconstr Surg*, 2016;137(2):453e-461e.
39. Yaphe, J., R. Edman, B. Knishkowsky, et al., The association between funding by commercial interests and study outcome in randomized controlled drug trials. *Fam Pract*, 2001;18(6):565-8.

## Appendix 2: Search strategy

We searched Ovid Medline (In-Process & Other Non-Indexed Citations and Ovid MEDLINE) in September 2015 using the MEDLINE (Ovid interface) search strategy for randomized controlled trials (Filter obtained from the Cochrane Handbook, under the Cochrane Highly Sensitive Search Strategy for identifying randomized trials in MEDLINE: sensitivity- and precision-maximizing version (2008 revision):

1. randomized controlled trial.pt.
2. controlled clinical trial.pt.
3. randomized.ab.
4. placebo.ab.
5. clinical trials as topic.sh.
6. randomly.ab.
7. trial.ti.
8. 1 or 2 or 3 or 4 or 5 or 6 or 7
9. exp animals/ not humans.sh.
10. 8 not 9
11. limit 10 to ("core clinical journals (aim)" and yr="2015")

1  
2  
3  
4  
5  
6  
7  
8  
9  
10  
11  
12  
13  
14  
15  
16  
17  
18  
19  
20  
21  
22  
23  
24  
25  
26  
27  
28  
29  
30  
31  
32  
33  
34  
35  
36  
37  
38  
39  
40  
41  
42  
43  
44  
45  
46  
47  
48  
49  
50  
51  
52  
53  
54  
55  
56  
57  
58  
59  
60

### Appendix 3: Types of funding sources

Internal funding

author is the “Chair of –”; intramural fund; provided by institution, university, hospital affiliation, academic affiliation

External funding:

1. *Government*

national, regional (province, county), or governmental body, organisation, or association

2. *Private-for-profit*

drug/device industry or private company

3. *Private not-for-profit with evidence of support by private-for-profit that is a health industry*

foundation or organisation that receives funding from a drug industry, as stated in information provided online

4. *Private not-for-profit with evidence of support by private-for-profit that is not a health industry*

foundation or philanthropy that was founded by billionaires or that receives funding from a private industry that is not known to produce drugs/devices, as stated in information provided online

5. *Private not-for-profit with no evidence of support by private-for-profit*

foundation or organisation that is not known to receive funding from any governmental or private company, as stated in information provided online

1  
2  
3 **Appendix 4:** Process followed to verify whether a private not-for-profit organisation was  
4 supported by a private-for-profit entity  
5  
6  
7  
8  
9

- 10 1- We searched for the official website of the funding source reported in the trial using an  
11 online search engine (e.g., Google).  
12  
13 2- We searched for relevant information in the following sections: About Us, Who we are,  
14 Supporters, Donors, Partners, Partnerships, Sponsors, Financial support, Financial  
15 statements, Finances, Financials.  
16  
17 3- If no relevant information was obtained from the official website, we searched the  
18 organisation on Wikipedia, LinkedIn profiles and Facebook.  
19  
20  
21  
22  
23  
24  
25  
26  
27  
28

29 PS: We did not contact funding sources to obtain any additional information.  
30  
31  
32  
33  
34  
35  
36  
37  
38  
39  
40  
41  
42  
43  
44  
45  
46  
47  
48  
49  
50  
51  
52  
53  
54  
55  
56  
57  
58  
59  
60



1  
2  
3 **Appendix 5: Details of the multivariable logistic regression analyses**  
4  
5  
6

7  
8 Analysis 1  
9

10 Dependent variable (categorical)  
11

- 12 • Reporting being funded (funded vs. not funded/not reported); all trials (N=200)  
13  
14  
15

16  
17 Independent variables  
18  
19

- 20 1. Type of intervention (categorical, pharmacologic vs. non-pharmacologic)  
21
- 22 2. Paper is the first one reporting on the findings of the trial (categorical, yes vs. no)  
23
- 24 3. Conflict of interest disclosure (COI present vs. COI absent/not reported)  
25 *We did not include this variable in the final model since we found it to be highly*  
26 *correlated with the dependent variable.*  
27  
28
- 29 4. Level of risk of bias associated with allocation concealment (categorical, low risk vs.  
30 high risk/unclear)  
31  
32
- 33 5. Journal impact factor (continuous)  
34
- 35 6. Number of randomized participants (continuous)  
36  
37
- 38 7. Classification of the country of the institution to which the first author is affiliated  
39  
40 (categorical, high-income vs. middle or low-income)  
41  
42
- 43 8. Journal requirement for reporting on the role of funder (categorical, yes vs. no)  
44  
45  
46  
47  
48  
49  
50  
51  
52  
53  
54  
55  
56  
57  
58  
59  
60

1  
2  
3 Analysis 2  
4

5 Dependent variable (categorical)  
6  
7

- 8 • Explicit reporting of the role of funder (reported vs. not reported); trials that reported  
9 being funded (N=171)  
10  
11  
12  
13

14  
15 Independent variables  
16

17 In addition to the eight independent variables listed in analysis 1, we also included the following  
18 variable:  
19  
20

- 21 9. Funding from private-for-profit source(s) as opposed to all other types of funding sources  
22 (categorical, yes vs. no)  
23  
24  
25  
26  
27  
28  
29  
30  
31  
32  
33  
34  
35  
36  
37  
38  
39  
40  
41  
42  
43  
44  
45  
46  
47  
48  
49  
50  
51  
52  
53  
54  
55  
56  
57  
58  
59  
60

## Results

|                                                                                                                                                       | Analysis 1              |           | Analysis 2              |           |
|-------------------------------------------------------------------------------------------------------------------------------------------------------|-------------------------|-----------|-------------------------|-----------|
|                                                                                                                                                       | Adjusted OR<br>(95% CI) | p-value   | Adjusted OR<br>(95% CI) | p-value   |
| Type of intervention<br>(pharmacologic as opposed to<br>non-pharmacologic)                                                                            | 1.79<br>(0.61 – 5.22)   | 0.284     | 1.60<br>(0.71 – 3.58)   | 0.261     |
| Paper is the first one reporting on<br>the findings of the trial                                                                                      | 0.63<br>(0.12 – 3.22)   | 0.577     | 3.47<br>(1.21 – 9.96)   | 0.021 *   |
| Level of risk of bias associated<br>with allocation concealment<br>(low risk as opposed to high<br>risk/unclear)                                      | 2.30<br>(0.62 – 8.38)   | 0.209     | 0.53<br>(0.22 – 1.32)   | 0.174     |
| Journal impact factor                                                                                                                                 | 1.43<br>(1.11 – 1.86)   | 0.006 *   | 1.06<br>(1.03 – 1.10)   | <0.0001 * |
| Number of randomized<br>participants                                                                                                                  | 1.00<br>(1.00 – 1.00)   | 0.477     | 1.00<br>(1.00 – 1.00)   | 0.152     |
| Classification of the country of<br>the institution to which the first<br>author is affiliated<br>(high-income as opposed to<br>middle or low-income) | 16.25<br>(4.03 – 65.5)  | <0.0001 * | 3.30<br>(0.41 – 26.60)  | 0.262     |
| Journal requirement for reporting<br>on the role of funder                                                                                            | 1.02<br>(0.36 – 2.84)   | 0.974     | 3.25<br>(1.43 – 7.38)   | 0.005 *   |
| Funding from private-for-profit<br>source(s)<br>(as opposed to all other types of<br>funding sources)                                                 | N/A                     | N/A       | 4.9<br>(2.11 – 11.83)   | <0.0001 * |

OR = odds ratio; CI = confidence interval

\* p-values for statistically significant associations.

## Appendix 6: Instrument for reporting of funding information

When filling this form, please report on all funding received to plan, conduct and/or report the research study under consideration, including the protocol, first and subsequent reports.

### SECTION 1 STUDY INFORMATION

1. Name of corresponding author

First name:

Last name:

2. Manuscript title

### SECTION 2 FUNDING RECEIVED

3. Did you receive any funding (monetary support, provision of supplies, assistance in manuscript writing, etc.) for the research study?

Yes

No

**If yes, please answer the questions below and complete the form. Please see instructions provided in Section 7.**

1  
2  
3  
4  
5  
6  
7  
8  
9  
10  
11  
12  
13  
14  
15  
16  
17  
18  
19  
20  
21  
22  
23  
24  
25  
26  
27  
28  
29  
30  
31  
32  
33  
34  
35  
36  
37  
38  
39  
40  
41  
42  
43  
44  
45  
46  
47  
48  
49

**SECTION 3  
FUNDING SOURCES**

4. Please list the study’s funding sources. For each source listed, please provide additional details and if applicable, report information on provision of supplies related to the research study.

| Funding sources<br>(include Grant ID if applicable) | Type of funder | Research phase(s) for which funding was received: |         |           | Monetary support<br>(indicate value) | Provision of supplies<br>(if applicable) |                |
|-----------------------------------------------------|----------------|---------------------------------------------------|---------|-----------|--------------------------------------|------------------------------------------|----------------|
|                                                     |                | Planning                                          | Conduct | Reporting |                                      | Type of supplies                         | Monetary value |
|                                                     |                |                                                   |         |           |                                      |                                          |                |
|                                                     |                |                                                   |         |           |                                      |                                          |                |
|                                                     |                |                                                   |         |           |                                      |                                          |                |
|                                                     |                |                                                   |         |           |                                      |                                          |                |
|                                                     |                |                                                   |         |           |                                      |                                          |                |

5. Is the funding provided by any of the funding sources listed above supported by an entity other than/external to the listed source? (Please see examples provided in Section 7.)

- Yes
- No
- Not known to the author

6. If Yes or No, please use the space below to provide additional details.

**SECTION 4  
INVOLVEMENT OF FUNDING SOURCES**

7. Please indicate the involvement of the funder(s) in the following roles by checking the respective cells.

| Funding source | Study planning and conduct |                         |                 |                 |               |                 | Study reporting (manuscript) |        |          |                    | Authorship                                     |
|----------------|----------------------------|-------------------------|-----------------|-----------------|---------------|-----------------|------------------------------|--------|----------|--------------------|------------------------------------------------|
|                | Design                     | Participant recruitment | Data collection | Data management | Data analysis | Quality control | Preparation                  | Review | Approval | Decision to submit | Are any of the authors employed by the funder? |
|                |                            |                         |                 |                 |               |                 |                              |        |          |                    |                                                |
|                |                            |                         |                 |                 |               |                 |                              |        |          |                    |                                                |
|                |                            |                         |                 |                 |               |                 |                              |        |          |                    |                                                |
|                |                            |                         |                 |                 |               |                 |                              |        |          |                    |                                                |
|                |                            |                         |                 |                 |               |                 |                              |        |          |                    |                                                |

8. If the funder was involved in any roles other than those listed above, please indicate them in the space below.

**SECTION 5  
ADDITIONAL INFORMATION**

9. Please use the space below to provide any additional information related to the study's funding sources.

1  
2  
3  
4  
5  
6  
7  
8  
9  
10  
11  
12  
13  
14  
15  
16  
17  
18  
19  
20  
21  
22  
23  
24  
25  
26  
27  
28  
29  
30  
31  
32  
33  
34  
35  
36  
37  
38  
39  
40  
41  
42  
43  
44  
45  
46  
47  
48  
49

**SECTION 6  
GUARANTOR CERTIFICATION**

This person, \_\_\_\_\_, acts as the guarantor of the study, certifies that the information in this form is accurate and complete, and confirms the following:

- The co-authors approved and verified the form for accuracy and completeness of the information.
- The form was updated at the time of submission of the manuscript for consideration for publication.
- The form was updated at the time of acceptance of the manuscript for final publication.

Date of last update (dd-mm-yyyy):

For peer review only

## SECTION 7 INSTRUCTIONS

### Section 3

Question 4 addresses characteristics of the funding sources. Explanations on type of funder:

- **Internal funder:** refers to a funder that is the author's own institution or employer. This term typically refers to an academic institution. Conceivably, it could refer to a non-academic institution (e.g., pharmaceutical company) when it funded a study conducted by its employees. *Example statements: internal research account, support through being the "Chair of–", intramural fund, funding provided by the academic institution, university, or hospital.*
- **External funder:** refers to a funder different than the author's own institution or employer. Types of external funders include:
  - **Government:** refers to governmental bodies, agencies, organizations, or associations at the national, regional (e.g., provincial), or local (e.g., municipal) levels. *Examples: National Institutes of Health (USA), the Danish Agency for Science Technology and Innovation.*
  - **Inter-governmental:** refers to two or more government agencies. *Examples: European Union.*
  - **Private-for-profit:** refers to an entity that operates to make profit. *Examples: drug or device industry, private company, insurance company, private laboratory.*
  - **Private not-for-profit:** refers to an organization that is not conducted primarily to make profit. *Examples: Doctors Without Borders, Bill and Melinda Gates Foundation.*

Questions 5 and 6 address whether the funding provided by any of the funding sources listed in Section 3 is supported by an entity other than/external to the listed source.

- **Example:** a private not-for-profit organization that is a partner of, or receives support (typically in the form of funding), from at least one entity other than itself.
  - *"The Epilepsy Foundation's mission is funded through the generous gifts of individual donors and many partner organizations, including corporations and corporate foundations, member organizations, and both state and federal government agencies, including the Centers for Disease Control and Prevention."*
  - *"The Pfizer Foundation is a charitable organization established by Pfizer Inc."*



#### Section 4

##### Questions 7 and 8 address the involvement of funding sources.

Funders may play a role in one or more steps of the research study. It is important to indicate whether a funder is involved in each of the following steps:

- **Study planning and conduct**
  - Study design and drafting the protocol
  - Study management
  - Participant recruitment
  - Data collection
  - Data management (e.g., verifying accuracy, storing data)
  - Data analysis
  - Quality control (e.g., oversight, auditing)
- **Study reporting (manuscript)**
  - Preparation: relates to drafting the manuscript or medical writing assistance (providing a medical writer or covering the writer's fees)
  - Review of the manuscript
  - Approval of the final version of the manuscript
  - Decision to submit the manuscript for publication (e.g., to what journal)
- **Authorship**
  - This relates to at least one of the employees of the funder being an author on the manuscript.
- **Other roles**

These include roles that are not captured by the steps listed above.

## APPENDICES

Appendix 1: Comparative chart including 23 related surveys of reporting of funding information in trials

| Survey                | Eligibility criteria                                                            | Number of trials | Year of trial publication | Characteristics of funding statement assessed in the survey                                                                               | Main findings                                                                                                                                                                              |
|-----------------------|---------------------------------------------------------------------------------|------------------|---------------------------|-------------------------------------------------------------------------------------------------------------------------------------------|--------------------------------------------------------------------------------------------------------------------------------------------------------------------------------------------|
| Als-Nielsen 2003 [19] | RCTs included in eligible meta-analyses in Cochrane reviews                     | 370              | 1971 - 2000               | - Source of funding                                                                                                                       | Funding was not reported in 29%. 39% were funded by for-profit organisations.                                                                                                              |
| Etter 2007 [25]       | RCTs on nicotine replacement therapy in Cochrane review                         | 90               | 1979 - 2003               | - Source of funding                                                                                                                       | 54% received pharmaceutical company support. 46% showed no evidence of pharmaceutical company support.                                                                                     |
| Mugambi 2013 [5]      | RCTs on infant formula supplementation of symbiotics, probiotics, or prebiotics | 67               | 1980 - 2012               | - Source of funding                                                                                                                       | 60% were funded by food industry. 24% did not specify their source of funding.                                                                                                             |
| Rochon 1994 [34]      | Manufacturer-associated RCTs of NSAIDs listed in MEDLINE                        | 52               | 1987 - 1990               | - Grant support<br>- Pharmaceutical authorship<br>- Provision of supplies<br>- Published in a pharmaceutical sponsored journal supplement | 19% reported grant support. 36.5% reported pharmaceutical authorship. 13.5% reported that manufacturer supplied drug. 31% were published in a pharmaceutical sponsored journal supplement. |
| Momeni 2008 [29]      | Trials published in 4 major plastic surgery journals                            | 346              | 1990 - 2005               | - Source of funding                                                                                                                       | 20% reported on financial support, of which 60% were supported by industrial sponsorship.                                                                                                  |

|                                      |                         |                                                                               |     |                     |                                                                                  |                                                                                                                                                                             |
|--------------------------------------|-------------------------|-------------------------------------------------------------------------------|-----|---------------------|----------------------------------------------------------------------------------|-----------------------------------------------------------------------------------------------------------------------------------------------------------------------------|
| 1<br>2<br>3<br>4<br>5<br>6<br>7<br>8 | Yaphe<br>2001 [39]      | RCTs of drugs or food<br>products published in 5<br>medical journals          | 314 | 1992 - 1994         | - Source of funding<br>- Pharmaceutical<br>authorship<br>- Provision of supplies | 68% received pharmaceutical industry<br>support.<br>33% received support as manpower<br>(authorship or statistical help).<br>21% received support as supply of drugs.       |
| 9<br>10<br>11<br>12<br>13            | Peppercorn<br>2007 [31] | Breast cancer clinical trials<br>published in 10 medical<br>journals          | 140 | 1993, 1998,<br>2003 | - Source of funding<br>- Pharmaceutical<br>authorship                            | 48% were categorised as pharmaceutical<br>studies.<br>26% reported pharmaceutical industry<br>authorship.                                                                   |
| 14<br>15<br>16<br>17<br>18<br>19     | Bero<br>2007 [20]       | Reports of RCTs comparing<br>statin drugs                                     | 192 | 1995 - 2005         | - Source of funding<br>- Role of funder                                          | 39% had no disclosure or no funding<br>(Table 1).<br>49% disclosed funding from industry, of<br>which 21% disclosed the role of the<br>sponsor.                             |
| 20<br>21<br>22                       | Djulgovic<br>2000 [24]  | RCTs for multiple myeloma                                                     | 130 | 1996 - 1998         | - Source of funding                                                              | 26% reported funding solely or in part by<br>commercial organisations.                                                                                                      |
| 23<br>24<br>25<br>26                 | Clifford<br>2002 [23]   | RCTs published in 5 high<br>impact factor general<br>medical journals         | 100 | 1999 - 2000         | - Source of funding                                                              | 94% were funded, of which 66% were<br>funded in whole or in part by industry.<br>6% did not disclose their source of<br>funding.                                            |
| 27<br>28<br>29<br>30                 | Bhandari<br>2004 [21]   | RCTs published in 8<br>surgical and 5 medical<br>journals                     | 332 | 1999 - 2001         | - Source of funding                                                              | 44% had no reported funding.<br>37% reported funding by industry.                                                                                                           |
| 31<br>32<br>33<br>34<br>35<br>36     | Tuech<br>2005 [36]      | Phase III cancer RCTs<br>published in 12 journals                             | 655 | 1999 - 2003         | - Source of funding<br>- Role of funder                                          | 35% were industry-sponsored, of which<br>18% reported the role of the study<br>sponsor.<br>21% did not disclose funding and only 1<br>trial disclosed no financial support. |
| 37<br>38<br>39                       | Shah<br>2005 [35]       | Articles published in the<br>Spine journal                                    | 34  | 2000 - 2003         | - Source of funding                                                              | 23% were industry funded.                                                                                                                                                   |
| 40<br>41<br>42<br>43<br>44<br>45     | Tungaraza<br>2007 [37]  | Original papers on<br>psychiatric drug treatment<br>published in two journals | 132 | 2000 - 2004         | - Source of funding<br>- Pharmaceutical<br>authorship                            | 85% were industry-funded.<br>40% were industry-authored studies.                                                                                                            |

|                               |                                                                                                                                                  |     |                            |                                         |                                                                                                                                                                |
|-------------------------------|--------------------------------------------------------------------------------------------------------------------------------------------------|-----|----------------------------|-----------------------------------------|----------------------------------------------------------------------------------------------------------------------------------------------------------------|
| Ridker<br>2006 [33]           | Cardiovascular medicine<br>RCTs published in 3<br>medical journals                                                                               | 349 | 2000 - 2005                | - Source of funding                     | 31% were financed by not-for-profit<br>organisations, 44% by for-profit<br>manufacturers, and 19% by both.<br>6% noted no source of funding.                   |
| Voineskos<br>2016 [38]        | Surgical RCTs                                                                                                                                    | 173 | 2000 - 2013                | - Source of funding                     | 58% did not acknowledge a source of<br>funding.<br>14% reported funding from for-profit<br>sources.<br>10% explicitly reported 'no funding<br>received'.       |
| Montogom<br>-ery<br>2004 [30] | RCTs on second generation<br>antipsychotics for the<br>management of<br>schizophrenia                                                            | 86  | 2002                       | - Source of funding                     | 84% were industry-funded.<br>16% were non-industry-funded.                                                                                                     |
| Perlis<br>2005 [32]           | RCTs published in one of<br>the four dermatology<br>journals with the highest<br>science citation impact<br>factor scores and total<br>citations | 179 | 2002                       | - Source of funding                     | 57% reported receiving at least some<br>industry support.<br>26% had no information about funding.                                                             |
| Khan<br>2012 [27]             | RCTs of drug therapy for<br>rheumatoid arthritis                                                                                                 | 103 | 2002 – 2003<br>2006 - 2007 | - Source of funding                     | 62% had complete or partial industry<br>funding.<br>19% had an unspecified funding source.                                                                     |
| Hodgson<br>2014 [26]          | RCTs in chronic wound care                                                                                                                       | 167 | 2004 - 2011                | - Source of funding                     | 35% were reported as having been<br>commercially funded.<br>26% either did not report the source of<br>funding or the status of funding source<br>was unclear. |
| Bridoux<br>2014 [22]          | Surgical trials published in<br>10 surgery journals with<br>impact factor >2                                                                     | 657 | 2005 - 2010                | - Source of funding<br>- Role of funder | 47% disclosed funding.<br>Of those, 39% reported funding from<br>industry or mixed funding, of which 35%<br>reported the role of study sponsor.                |

1  
2  
3  
4  
5  
6  
7  
8  
9  
10  
11  
12  
13  
14  
15  
16  
17  
18  
19  
20  
21  
22  
23  
24  
25  
26  
27  
28  
29  
30  
31  
32  
33  
34  
35  
36  
37  
38  
39  
40  
41  
42  
43  
44  
45  
46  
47  
48  
49

|                 |                                                                                                       |     |             |                                                                                                                                                    |                                                                                                                                                                                                                                                                                                                                                                                                                                                                                                        |
|-----------------|-------------------------------------------------------------------------------------------------------|-----|-------------|----------------------------------------------------------------------------------------------------------------------------------------------------|--------------------------------------------------------------------------------------------------------------------------------------------------------------------------------------------------------------------------------------------------------------------------------------------------------------------------------------------------------------------------------------------------------------------------------------------------------------------------------------------------------|
| Lundh 2012 [28] | RCTs published in The Lancet and fully funded by a drug or device company                             | 69  | 2008 - 2009 | - Role of funder                                                                                                                                   | <p>Sponsor had a role in:</p> <ul style="list-style-type: none"> <li>Review and verification of information (71%)</li> <li>Entry of data into the study database (75%)</li> <li>Data storage (64%)</li> <li>Data analysis (58%)</li> <li>Coordinating writing of the manuscript (35%)</li> <li>Medical writing assistance (54%)</li> <li>Protocol writing (99%)</li> <li>Co-authorship (81%)</li> <li>Publication of results through co-authorship or approval/review of the paper (93%)</li> </ul>    |
| Current survey  | RCTs published in any of the 119 Core Clinical Journals, not restricted to a specific clinical domain | 200 | 2015        | <ul style="list-style-type: none"> <li>- Source of funding</li> <li>- Amount</li> <li>- Provision of supplies</li> <li>- Role of funder</li> </ul> | <p>89% included a funding statement, of which 96% reported being funded.</p> <p>Of the funded trials (N=171):</p> <ul style="list-style-type: none"> <li>- 100% specified the source;</li> <li>- 40% received funding from private-for-profit sources;</li> <li>- 1% reported the amount of funding;</li> <li>- 21% of pharmacological/surgical trials (N=139) reported information on supplies.</li> <li>- 50% reported on the roles of funders (26% as involved and 24% as not involved).</li> </ul> |

RCT: randomised controlled trial

References of studies included in Table 1  
(in order of appearance in the manuscript)

5. Mugambi, M.N., A. Musekiwa, M. Lombard, et al., Association between funding source, methodological quality and research outcomes in randomized controlled trials of synbiotics, probiotics and prebiotics added to infant formula: a systematic review. *BMC Med Res Methodol*, 2013;13:137.
19. Als-Nielsen, B., W. Chen, C. Gluud, et al., Association of funding and conclusions in randomized drug trials: a reflection of treatment effect or adverse events? *JAMA*, 2003;290(7):921-8.
20. Bero, L., F. Oostvogel, P. Bacchetti, et al., Factors associated with findings of published trials of drug-drug comparisons: why some statins appear more efficacious than others. *PLoS Med*, 2007;4(6):e184.
21. Bhandari, M., J.W. Busse, D. Jackowski, et al., Association between industry funding and statistically significant pro-industry findings in medical and surgical randomized trials. *CMAJ*, 2004;170(4):477-80.
22. Bridoux, V., G. Moutel, L. Schwarz, et al., Disclosure of funding sources and conflicts of interest in phase III surgical trials: survey of ten general surgery journals. *World J Surg*, 2014;38(10):2487-93.
23. Clifford, T.J., N.J. Barrowman and D. Moher, Funding source, trial outcome and reporting quality: are they related? Results of a pilot study. *BMC Health Serv Res*, 2002;2(1):18.
24. Djulbegovic, B., M. Lacey, A. Cantor, et al., The uncertainty principle and industry-sponsored research. *Lancet*, 2000;356(9230):635-8.
25. Etter, J.F., M. Burri and J. Stapleton, The impact of pharmaceutical company funding on results of randomized trials of nicotine replacement therapy for smoking cessation: a meta-analysis. *Addiction*, 2007;102(5):815-22.
26. Hodgson, R., R. Allen, E. Broderick, et al., Funding source and the quality of reports of chronic wounds trials: 2004 to 2011. *Trials*, 2014;15:19.
27. Khan, N.A., J.I. Lombeida, M. Singh, et al., Association of industry funding with the outcome and quality of randomized controlled trials of drug therapy for rheumatoid arthritis. *Arthritis Rheum*, 2012;64(7):2059-67.
28. Lundh, A., L.T. Krogsboll and P.C. Gotzsche, Sponsors' participation in conduct and reporting of industry trials: a descriptive study. *Trials*, 2012;13:146.
29. Momeni, A., A. Becker, H. Bannasch, et al., Association between research sponsorship and study outcome in plastic surgery literature. *Ann Plast Surg*, 2009;63(6):661-4.
30. Montgomery, J.H., M. Byerly, T. Carmody, et al., An analysis of the effect of funding source in randomized clinical trials of second generation antipsychotics for the treatment of schizophrenia. *Control Clin Trials*, 2004;25(6):598-612.
31. Peppercorn, J., E. Blood, E. Winer, et al., Association between pharmaceutical involvement and outcomes in breast cancer clinical trials. *Cancer*, 2007;109(7):1239-46.
32. Perlis, C.S., M. Harwood and R.H. Perlis, Extent and impact of industry sponsorship conflicts of interest in dermatology research. *J Am Acad Dermatol*, 2005;52(6):967-71.
33. Ridker, P.M. and J. Torres, Reported outcomes in major cardiovascular clinical trials funded by for-profit and not-for-profit organizations: 2000-2005. *JAMA*, 2006;295(19):2270-4.
34. Rochon, P.A., J.H. Gurwitz, R.W. Simms, et al., A study of manufacturer-supported trials of nonsteroidal anti-inflammatory drugs in the treatment of arthritis. *Arch Intern Med*, 1994;154(2):157-63.
35. Shah, R.V., T.J. Albert, V. Bruegel-Sanchez, et al., Industry support and correlation to study outcome for papers published in *Spine*. *Spine (Phila Pa 1976)*, 2005;30(9):1099-104; discussion 1105.
36. Tuech, J.J., G. Moutel, P. Pessaux, et al., Disclosure of competing financial interests and role of sponsors in phase III cancer trials. *Eur J Cancer*, 2005;41(15):2237-40.
37. Tungaraza, T. and R. Poole, Influence of drug company authorship and sponsorship on drug trial outcomes. *Br J Psychiatry*, 2007;191:82-3.
38. Voineskos, S.H., C.J. Coroneos, N.I. Ziolkowski, et al., A Systematic Review of Surgical Randomized Controlled Trials: Part 2. Funding Source, Conflict of Interest, and Sample Size in Plastic Surgery. *Plast Reconstr Surg*, 2016;137(2):453e-461e.
39. Yaphe, J., R. Edman, B. Knishkowsky, et al., The association between funding by commercial interests and study outcome in randomized controlled drug trials. *Fam Pract*, 2001;18(6):565-8.

1  
2  
3 **Appendix 12:** Search strategy  
4  
5  
6  
7

8 [We searched Ovid Medline \(In-Process & Other Non-Indexed Citations and Ovid MEDLINE\) in](#)  
9  
10 [September 2015 using the](#) MEDLINE (Ovid interface) search strategy for randomized controlled  
11  
12 trials (Filter obtained from the Cochrane Handbook, under the Cochrane Highly Sensitive Search  
13  
14 Strategy for identifying randomized trials in MEDLINE: sensitivity- and precision-maximizing  
15  
16  
17 version (2008 revision):  
18

- 19 1. randomized controlled trial.pt.
- 20 2. controlled clinical trial.pt.
- 21 3. randomized.ab.
- 22 4. placebo.ab.
- 23 5. clinical trials as topic.sh.
- 24 6. randomly.ab.
- 25 7. trial.ti.
- 26 8. 1 or 2 or 3 or 4 or 5 or 6 or 7
- 27 9. exp animals/ not humans.sh.
- 28 10. 8 not 9
- 29 11. limit 10 to ("core clinical journals (aim)" and yr="2015")  
30  
31  
32  
33  
34  
35  
36  
37  
38  
39  
40  
41  
42  
43  
44  
45  
46  
47  
48  
49  
50  
51  
52  
53  
54  
55  
56  
57  
58  
59  
60

### Appendix 3: Types of funding sources

#### Internal funding

author is the “Chair of–”; intramural fund; provided by institution, university, hospital affiliation, academic affiliation

#### External funding:

1. *Government*

national, regional (province, county), or governmental body, organisation, or association

2. *Private-for-profit*

drug/device industry or private company

3. *Private not-for-profit with evidence of support by private-for-profit that is a health industry*

foundation or organisation that receives funding from a drug industry, as stated in information provided online

4. *Private not-for-profit with evidence of support by private-for-profit that is not a health industry*

foundation or philanthropy that was founded by billionaires or that receives funding from a private industry that is not known to produce drugs/devices, as stated in information provided online

5. *Private not-for-profit with no evidence of support by private-for-profit*

foundation or organisation that is not known to receive funding from any governmental or private company, as stated in information provided online



Appendix 4: Process followed to verify whether a private not-for-profit organisation was supported by a private-for-profit entity

- 1- We searched for the official website of the funding source reported in the trial using an online search engine (e.g., Google).
- 2- We searched for relevant information in the following sections: About Us, Who we are, Supporters, Donors, Partners, Partnerships, Sponsors, Financial support, Financial statements, Finances, Financials.
- 3- If no relevant information was obtained from the official website, we searched the organisation on Wikipedia, LinkedIn profiles and Facebook.

PS: We did not contact funding sources to obtain any additional information.

1  
2  
3 | **Appendix 25:** Details of the multiple variable logistic regression analyses  
4  
5  
6

7  
8 Analysis 1  
9

10 Dependent variable (categorical)  
11

- 12 • Reporting being funded (funded vs. not funded/not reported); all trials (N=200)  
13  
14  
15  
16

17 Independent variables  
18

- 19 1. Type of intervention (categorical, pharmacologic vs. non-pharmacologic)  
20
- 21 2. Paper is the first one reporting on the findings of the trial (categorical, yes vs. no)  
22
- 23 3. Conflict of interest disclosure (COI present vs. COI absent/not reported)  
24  
25 *We did not include this variable in the final model since we found it to be highly*  
26 *correlated with the dependent variable.*  
27  
28
- 29 4. Level of risk of bias associated with allocation concealment (categorical, low risk vs.  
30  
31 high risk/unclear)  
32
- 33 5. Journal impact factor (continuous)  
34
- 35 6. Number of randomized participants (continuous)  
36  
37
- 38 7. Classification of the country of the institution to which the first author is affiliated  
39  
40 (categorical, high-income vs. middle or low-income)  
41  
42
- 43 8. Journal requirement for reporting on the role of funder (categorical, yes vs. no)  
44  
45  
46  
47  
48  
49  
50  
51  
52  
53  
54  
55  
56  
57  
58  
59  
60

## Results

|                                                                                                                                                | Adjusted OR<br>(95% CI) | p-value |
|------------------------------------------------------------------------------------------------------------------------------------------------|-------------------------|---------|
| Type of intervention<br>(pharmacologic as opposed to non-pharmacologic)                                                                        | 1.79<br>(0.61—5.22)     | 0.284   |
| Paper is the first one reporting on the findings of the trial                                                                                  | 0.63<br>(0.12—3.22)     | 0.577   |
| Level of risk of bias associated with allocation concealment<br>(low risk as opposed to high risk/unclear)                                     | 2.30<br>(0.62—8.38)     | 0.209   |
| Journal impact factor *                                                                                                                        | 1.43<br>(1.11—1.86)     | 0.006   |
| Number of randomized participants                                                                                                              | 1.00<br>(1.00—1.00)     | 0.477   |
| Classification of the country of the institution to which the first author is affiliated *<br>(high-income as opposed to middle or low-income) | 16.25<br>(4.03—65.5)    | <0.0001 |
| Journal requirement for reporting on the role of funder                                                                                        | 1.02<br>(0.36—2.84)     | 0.974   |

OR = odds ratio; CI = confidence interval

\* p-values for statistically significant associations.

## Analysis 2

## Dependent variable (categorical)

- Explicit reporting of the role of funder (reported vs. not reported); trials that reported being funded (N=171)

## Independent variables

In addition to the eight independent variables listed in analysis 1, we also included the following variable:

- ~~9. Type of intervention (categorical, pharmacologic vs. non-pharmacologic)~~
- ~~10. Paper is the first one reporting on the findings of the trial (categorical, yes vs. no)~~
- ~~11. Conflict of interest disclosure (COI present vs. COI absent/not reported)~~
- ~~12. We did not include this variable in the final model since we found it to be highly correlated with the dependent variable.~~
- ~~13.~~
- ~~14. Level of risk of bias associated with allocation concealment (categorical, low risk vs. high risk/unclear)~~
- ~~15. Journal impact factor (continuous)~~
- ~~16. Number of randomized participants (continuous)~~
- ~~17. Classification of the country of the institution to which the first author is affiliated (categorical, high-income vs. middle or low-income)~~
- ~~18. Journal requirement for reporting on the role of funder (categorical, yes vs. no)~~
19. Funding from private-for-profit source(s) as opposed to all other types of funding sources (categorical, yes vs. no)

## Results

|                                                                                                                                              | Adjusted OR<br>(95% CI) | p-value |
|----------------------------------------------------------------------------------------------------------------------------------------------|-------------------------|---------|
| Type of intervention<br>(pharmacologic as opposed to non-pharmacologic)                                                                      | 1.60<br>(0.71—3.58)     | 0.261   |
| Paper is the first one reporting on the findings of the trial*                                                                               | 3.47<br>(1.21—9.96)     | 0.021   |
| Level of risk of bias associated with allocation concealment<br>(low risk as opposed to high risk/unclear)                                   | 0.53<br>(0.22—1.32)     | 0.174   |
| Journal impact factor*                                                                                                                       | 1.06<br>(1.03—1.10)     | <0.0001 |
| Number of randomized participants                                                                                                            | 1.00<br>(1.00—1.00)     | 0.152   |
| Classification of the country of the institution to which the first author is affiliated<br>(high-income as opposed to middle or low-income) | 3.30<br>(0.41—26.60)    | 0.262   |
| Journal requirement for reporting on the role of funder*                                                                                     | 3.25<br>(1.43—7.38)     | 0.005   |
| Funding from private for-profit source(s)*                                                                                                   | 4.9<br>(2.11—11.83)     | <0.0001 |

OR = odds ratio; CI = confidence interval

\*p-values for statistically significant associations.

**MERGED Results**

|                                                                                                                                                       | <u>Analysis 1</u>       |           | <u>Analysis 2</u>       |           |
|-------------------------------------------------------------------------------------------------------------------------------------------------------|-------------------------|-----------|-------------------------|-----------|
|                                                                                                                                                       | Adjusted OR<br>(95% CI) | p-value   | Adjusted OR<br>(95% CI) | p-value   |
| Type of intervention<br>(pharmacologic as opposed to<br>non-pharmacologic)                                                                            | 1.79<br>(0.61 – 5.22)   | 0.284     | 1.60<br>(0.71 – 3.58)   | 0.261     |
| Paper is the first one reporting on<br>the findings of the trial                                                                                      | 0.63<br>(0.12 – 3.22)   | 0.577     | 3.47<br>(1.21 – 9.96)   | 0.021 *   |
| Level of risk of bias associated<br>with allocation concealment<br>(low risk as opposed to high<br>risk/unclear)                                      | 2.30<br>(0.62 – 8.38)   | 0.209     | 0.53<br>(0.22 – 1.32)   | 0.174     |
| Journal impact factor                                                                                                                                 | 1.43<br>(1.11 – 1.86)   | 0.006 *   | 1.06<br>(1.03 – 1.10)   | <0.0001 * |
| Number of randomized<br>participants                                                                                                                  | 1.00<br>(1.00 – 1.00)   | 0.477     | 1.00<br>(1.00 – 1.00)   | 0.152     |
| Classification of the country of<br>the institution to which the first<br>author is affiliated<br>(high-income as opposed to<br>middle or low-income) | 16.25<br>(4.03 – 65.5)  | <0.0001 * | 3.30<br>(0.41 – 26.60)  | 0.262     |
| Journal requirement for reporting<br>on the role of funder                                                                                            | 1.02<br>(0.36 – 2.84)   | 0.974     | 3.25<br>(1.43 – 7.38)   | 0.005 *   |
| Funding from private-for-profit<br>source(s)<br><u>(as opposed to all other types of<br/>funding sources)</u>                                         | N/A                     | N/A       | 4.9<br>(2.11 – 11.83)   | <0.0001 * |

OR = odds ratio; CI = confidence interval

\* p-values for statistically significant associations.

1  
2  
3  
4  
5  
6  
7  
8  
9  
10  
11  
12  
13  
14  
15  
16  
17  
18  
19  
20  
21  
22  
23  
24  
25  
26  
27  
28  
29  
30  
31  
32  
33  
34  
35  
36  
37  
38  
39  
40  
41  
42  
43  
44  
45  
46  
47  
48  
49  
50  
51  
52  
53  
54  
55  
56  
57  
58  
59  
60

[Appendix 6: Instrument for reporting of funding information](#)

[Please see the PDF supplementary file \(does not include tracked changes\).](#)

For peer review only

# BMJ Open

## Characteristics of funding of clinical trials: cross-sectional survey and proposed guidance

|                                 |                                                                                                                                                                                                                                                                                                                                                                                                                                                                                                                                                                                                                                                                                                                                                                                                                                                                                                                                                                         |
|---------------------------------|-------------------------------------------------------------------------------------------------------------------------------------------------------------------------------------------------------------------------------------------------------------------------------------------------------------------------------------------------------------------------------------------------------------------------------------------------------------------------------------------------------------------------------------------------------------------------------------------------------------------------------------------------------------------------------------------------------------------------------------------------------------------------------------------------------------------------------------------------------------------------------------------------------------------------------------------------------------------------|
| Journal:                        | <i>BMJ Open</i>                                                                                                                                                                                                                                                                                                                                                                                                                                                                                                                                                                                                                                                                                                                                                                                                                                                                                                                                                         |
| Manuscript ID                   | bmjopen-2017-015997.R2                                                                                                                                                                                                                                                                                                                                                                                                                                                                                                                                                                                                                                                                                                                                                                                                                                                                                                                                                  |
| Article Type:                   | Research                                                                                                                                                                                                                                                                                                                                                                                                                                                                                                                                                                                                                                                                                                                                                                                                                                                                                                                                                                |
| Date Submitted by the Author:   | 04-Jul-2017                                                                                                                                                                                                                                                                                                                                                                                                                                                                                                                                                                                                                                                                                                                                                                                                                                                                                                                                                             |
| Complete List of Authors:       | Hakoum, Maram; American University of Beirut Medical Center, Clinical Research Institute<br>Jouni, Nahla; American University of Beirut, Faculty of Agriculture and Food Sciences<br>Abou-Jaoude, Eliane; University at Buffalo - The State University of New York, Department of Internal Medicine<br>Hasbani, Divina ; American University of Beirut Faculty of Medicine<br>Abou-Jaoude, Elias; University at Buffalo - The State University of New York<br>Lopes, Luciane; University of Sorocaba, Pharmacology<br>Khalidieh, Mariam; American University of Beirut, Faculty of Sciences<br>Hammoud, Mira; Massachusetts General Hospital, Department of Psychiatry<br>Al-Gibbawi, Mounir; American University of Beirut Faculty of Medicine<br>Anouti, Sirine; American University of Beirut, Department of Epidemiology and Population Health<br>Guyatt, Gordon; McMaster University,<br>Akl, Elie; American University of Beirut, Department of Internal Medicine |
| <b>Primary Subject Heading</b>: | Research methods                                                                                                                                                                                                                                                                                                                                                                                                                                                                                                                                                                                                                                                                                                                                                                                                                                                                                                                                                        |
| Secondary Subject Heading:      | Ethics, Medical publishing and peer review, Research methods                                                                                                                                                                                                                                                                                                                                                                                                                                                                                                                                                                                                                                                                                                                                                                                                                                                                                                            |
| Keywords:                       | funding, role of funder, randomised controlled trial                                                                                                                                                                                                                                                                                                                                                                                                                                                                                                                                                                                                                                                                                                                                                                                                                                                                                                                    |
|                                 |                                                                                                                                                                                                                                                                                                                                                                                                                                                                                                                                                                                                                                                                                                                                                                                                                                                                                                                                                                         |

SCHOLARONE™  
Manuscripts



1  
2  
3 **1 Characteristics of funding of clinical trials: cross-sectional survey and proposed guidance**  
4  
5  
6  
7

8  
9  
10  
11  
12  
13  
14  
15  
16  
17  
18  
19  
20  
21  
22  
23  
24  
25  
26  
27  
28  
29  
30  
31  
32  
33  
34  
35  
36  
37  
38  
39  
40  
41  
42  
43  
44  
45  
46  
47  
48  
49  
50  
51  
52  
53  
54  
55  
56  
57  
58  
59  
60

2  
3 Maram B. Hakoum, Nahla Jouni, Eliane A. Abou-Jaoude, Divina Justina Hasbani, Elias A.  
4 Abou-Jaoude, Luciane Cruz Lopes, Mariam Khaldieh, Mira Z. Hammoud, Mounir Al-Gibbawi,  
5 Sirine Anouti, Gordon Guyatt, Elie A. Akl

7 Maram B. Hakoum; MD; maram.hakoum@gmail.com <sup>1</sup>

8 Nahla Jouni; BS; nahla.jouni@gmail.com <sup>2</sup>

9 Eliane A. Abou-Jaoude; MD; eaaj22@gmail.com <sup>3</sup>

10 Divina Justina Hasbani; BS; divinahasbani@gmail.com <sup>4</sup>

11 Elias A. Abou-Jaoude; MBA; eliasaj93@gmail.com <sup>5</sup>

12 Luciane Cruz Lopes; PhD; luslopes@terra.com.br <sup>6</sup>

13 Mariam Khaldieh; BS; mek11@mail.aub.edu <sup>7</sup>

14 Mira Zein Hammoud; MD; mirahammoud@gmail.com <sup>8</sup>

15 Mounir Al Gibbawi; BS; mounir.algibbawi@gmail.com <sup>4</sup>

16 Sirine Anouti; MPH; sirine.anouti@gmail.com <sup>9</sup>

17 Gordon Guyatt; MD, MSc.; guyatt@mcmaster.ca <sup>10</sup>

18 Elie A. Akl; MD, MPH, PhD; ea32@aub.edu.lb <sup>1,10,11</sup>

20 <sup>1</sup> Clinical Research Institute, American University of Beirut Medical Center, Beirut, Lebanon

21 <sup>2</sup> Faculty of Agriculture and Food Sciences, American University of Beirut, Beirut, Lebanon

22 <sup>3</sup> Department of Internal Medicine, State University of New York at Buffalo, New York, United  
23 States of America

1  
2  
3 1 <sup>4</sup> Faculty of Medicine, American University of Beirut, Beirut, Lebanon  
4

5 2 <sup>5</sup> State University of New York at Buffalo, New York, United States of America  
6

7 3 <sup>6</sup> Graduate Program in Pharmaceutical Sciences, University of Sorocaba, São Paulo, Brazil  
8

9 4 <sup>7</sup> Faculty of Sciences, American University of Beirut, Beirut, Lebanon  
10

11 5 <sup>8</sup> Department of Psychiatry, Massachusetts General Hospital, Boston, United States of America  
12

13 6 <sup>9</sup> Department of Epidemiology and Population Health, American University of Beirut, Beirut,  
14

15 7 Lebanon  
16

17 8 <sup>10</sup> Department of Health Research Methods, Evidence, and Impact, McMaster University,  
18

19 9 Hamilton, Ontario, Canada  
20

21 10 <sup>11</sup> Department of Internal Medicine, American University of Beirut Medical Center, Beirut,  
22

23 11 Lebanon  
24

25 12  
26

27 13 **Corresponding Author:**  
28

29 14 Elie A. Akl, MD, MPH, PhD  
30

31 15 Department of Internal Medicine  
32

33 16 American University of Beirut Medical Center  
34

35 17 P.O. Box: 11-0236  
36

37 18 Riad-El-Solh Beirut 1107 2020  
38

39 19 Beirut – Lebanon  
40

41 20 Phone: +961 1 374374  
42

43 21 ea32@aub.edu.lb  
44  
45  
46  
47  
48  
49  
50  
51  
52  
53  
54  
55  
56  
57  
58  
59  
60

1  
2  
3 1 "The Corresponding Author has the right to grant on behalf of all authors and does grant on  
4  
5 2 behalf of all authors, a worldwide licence to the Publishers and its licensees in perpetuity, in all  
6  
7 3 forms, formats and media (whether known now or created in the future), to i) publish, reproduce,  
8  
9 4 distribute, display and store the Contribution, ii) translate the Contribution into other languages,  
10  
11 5 create adaptations, reprints, include within collections and create summaries, extracts and/or,  
12  
13 6 abstracts of the Contribution and convert or allow conversion into any format including without  
14  
15 7 limitation audio, iii) create any other derivative work(s) based in whole or part on the  
16  
17 8 Contribution, iv) to exploit all subsidiary rights to exploit all subsidiary rights that currently exist  
18  
19 9 or as may exist in the future in the Contribution, v) the inclusion of electronic links from the  
20  
21 10 Contribution to third party material where-ever it may be located; and, vi) licence any third party  
22  
23 11 to do any or all of the above."  
24  
25  
26  
27  
28  
29  
30  
31  
32  
33  
34  
35  
36  
37  
38  
39  
40  
41  
42  
43  
44  
45  
46  
47  
48  
49  
50  
51  
52  
53  
54  
55  
56  
57  
58  
59  
60

13 **Keywords:** funding, role of funder, randomised controlled trial

15 **Word count:** 3,706 words

## 1 ABSTRACT

2 **Objectives:** To provide a detailed and current characterisation of funding of a representative  
3 sample clinical trials. We also aimed to develop guidance for standardised reporting of funding  
4 information.

5 **Methods:** We addressed the extent to which clinical trials published in 2015 in any of the 119  
6 Core Clinical Journals included a statement on the funding source (e.g., whether a not-for-profit  
7 organisation was supported by a private-for-profit), type of funding, amount and role of funder.  
8 We used a stepwise approach to develop a guidance and an instrument for standardised reporting  
9 of funding information.

10 **Results:** Of 200 trials, 178 (89%) included a funding statement, of which 171 (96%) reported  
11 being funded. Funding statements in the 171 funded trials indicated the source in 100%, amount  
12 in 1% and roles of funders in 50%. The most frequent sources were governmental (58%) and  
13 private-for-profit (40%). Of 54 funding statements in which the source was a not-for-profit  
14 organisation, we found evidence of undisclosed support of those organisations from private-for-  
15 profit organisation(s) in 26 (48%). The most frequently reported roles of funders in the 171  
16 funded trials related to study design (42%) and data analysis, interpretation, or management  
17 (41%). Of 139 RCTs addressing pharmacological or surgical interventions, 29 (21%) reported  
18 information on the supplier of the medication or device. The proposed guidance addresses both  
19 the funding information that RCTs should report and the reporting process. Attached to the  
20 guidance is a fillable PDF document for use as an instrument for standardised reporting of  
21 funding information.

22 **Conclusion:** Although the majority of RCTs report funding, there is considerable variability in  
23 the reporting of funding source, amount and roles of funders. A standardised approach to

1 reporting of funding information would address these limitations. Future research should explore  
2 the implications of funding by not-for profit organisations that are supported by for-profit  
3 organisations.

4  
5 **Strengths and limitations of this study:**

- 6 • First cross-sectional survey of a large and representative sample of clinical RCTs to  
7 describe the characteristics of the funding statements in detail.
- 8 • Provides a proposed guidance and instrument for standardised reporting of funding  
9 information.
- 10 • Use of systematic and transparent methods, e.g., duplicate and independent processes in  
11 screening and data collection.
- 12 • Includes trials limited to the clinical field and so our findings may not apply similarly to  
13 other fields such as public health research.

## 1 BACKGROUND

2 Funding sources may influence the reporting of research findings and the interpretation of  
3 results.[1-6] One study found that 86% of trial protocols documented an industry partner's right  
4 to disapprove or review proposed manuscripts.[7] This might also apply to other types of  
5 funders, for example, government. Reporting of funding in trials may appropriately influence  
6 how physicians interpret and use trial findings in clinical practice.[8, 9] The Consolidated  
7 Standards of Reporting Trials (CONSORT) checklist recognises this issue by including a section  
8 on reporting of funding.[10, 11]

9  
10 Reports in the lay media have documented how for-profit organisations support research through  
11 not-for-profit organisations.[12, 13] In one example, The Independent recently highlighted a  
12 systematic review suggesting that the consumption of low-energy sweeteners in place of sugar  
13 reduces energy intake and body weight.[14] The review authors list the International Life  
14 Sciences Institute as the study funder. While the Institute describes itself as “a nonprofit,  
15 worldwide organisation whose mission is to provide science that improves human health”, it  
16 receives funding primarily from companies such as the Coca-Cola Company, PepsiCo and  
17 Nestlé.[15] Other examples of not-for-profit organisations funded by industry and supporting  
18 research are the Sugar Association, Inc. [16, 17] and the now defunct Global Energy Balance  
19 Network.[18]

20  
21 We conducted a comprehensive review of the literature and found 22 studies that assessed  
22 reporting of funding in clinical trials (see appendix 1).[5, 19-39] The main gap we identified in  
23 this literature is a detailed and current characterisation of funding of a representative sample of

1 trials. Indeed, all of the identified studies focused on trials published in specific clinical areas or  
2 journals. Most (14, 64%) reported only on funded trials or did not differentiate between non-  
3 funded trials and those that do not report on funding. Seventeen studies (77%) did not always  
4 distinguish trials with no funding from those funded by the government or by not-for-profit  
5 sources. Moreover, these studies seldom assessed reporting on the role of funder (n=4), provision  
6 of supplies (n=2), and the amount of funding (n=0). None of the studies explored the relationship  
7 between not-for-profit organizations funding trials and for-profit organizations.

8  
9 Therefore the main objective of this study was to provide a detailed and current characterisation  
10 of funding of a representative sample of clinical trials. We also aimed to develop guidance for  
11 standardised reporting of funding information.

## 12 13 **METHODS**

### 14 **Design overview and definitions**

15 We followed systematic methodology to conduct a cross-sectional survey of published  
16 randomised controlled trials (RCTs). We define funding as any support (e.g. monetary support,  
17 provision of supplies, assistance in manuscript writing). We considered as funding statement any  
18 text in the trial report providing any information regarding the funding of the trial, including a  
19 statement of no funding. A funding statement could indicate more than one funding contribution.

### 20 21 **Eligibility criteria**

22 We included reports of studies described as RCTs comparing at least two therapeutic  
23 interventions of any type in humans and published in English. We included RCTs with cross-

1 over designs and secondary reports of trials (i.e. follow-up study, post-hoc analysis, interim  
2 analysis, pre-specified analysis or secondary outcomes or sub-study of a trial). We excluded non-  
3 randomised trials, trials addressing basic sciences topics and non-clinical interventions, and  
4 research letters.

## 6 **Search strategy**

7 We searched Ovid Medline in September 2015 and limited our search to the year 2015 and the  
8 119 Core Clinical Journals (Abridged Index Medicus (AIM)).[40] We applied the search filter  
9 obtained from the Cochrane handbook to identify RCTs. See appendix 2 for the detailed search  
10 strategy.

## 12 **Selection process**

13 We used an online sequence generator ([www.random.org/sequences](http://www.random.org/sequences)) to randomise the citations  
14 captured by the search. We followed the order of the randomization list to screen citations until  
15 we obtained 200 eligible RCTs. Our sample size allows for a narrow 95% confidence interval  
16 (+/- 5%) around proportions of studies reporting sources of funding.

18 Following calibration exercises, three reviewers (MBH, NJ, MK) worked in teams of two (MBH  
19 was the reviewer on both) to screen titles and abstracts in duplicate and independently, using  
20 EndNote™ X7.5 software (Thomson Reuters, Philadelphia, PA, USA). We obtained the full-  
21 texts of citations judged as potentially eligible by either reviewer. The two teams of reviewers  
22 screened full-texts in duplicate and independently. They resolved disagreements by discussion,



1  
2  
3 1 or with the help of a third reviewer (EAA) as needed. A PRISMA study flow diagram [41]  
4  
5  
6 2 presents the results of the selection process (figure 1).  
7  
8  
9 3

#### 10 4 **Data extraction process**

11  
12 5 We developed a standardised data extraction form along with specific instructions. After pilot  
13 6 testing the form, we embedded it electronically into Research Electronic Data Capture  
14 7 (REDCap), a secure web-based application designed to support data capture for research  
15 8 studies.[42] After completing calibration exercises, nine authors divided into teams of two  
16 9 extracted data in duplicate and independently (MBH was a reviewer on each of the eight teams).  
17 10 Each team compared results and resolved disagreements through discussion, or with the help of a  
18 11 third reviewer (EAA) as needed.  
19  
20  
21  
22  
23  
24  
25  
26  
27  
28  
29  
30  
31

#### 32 13 **Data extracted**

33  
34 14 We extracted the following characteristics of the RCTs:

- 35  
36 15 • Number of trial authors,  
37  
38 16 • Whether it is the first full-text report of the trial findings,  
39  
40 17 • Classification of the income level of the country in which the first author's institution is  
41  
42 18 located (as high, upper-middle, lower-middle, or low income country according to the  
43  
44 19 July 2015 World Bank list of economies),  
45  
46  
47 20 • Type of intervention and type of control,  
48  
49 21 • Number of trial sites,  
50  
51 22 • Number of randomised participants,  
52  
53  
54  
55  
56  
57  
58  
59  
60

- 1
- 2
- 3
- 4 1 • Level of risk of bias associated with allocation concealment, a methodological feature as
- 5
- 6 2 an indicator of risk of bias (based on the Cochrane Collaboration's tool for assessing risk
- 7
- 8 3 of bias)[43],
- 9
- 10 4 • Whether authors reported conflicts of interest,
- 11
- 12
- 13 5 • Whether the report included a funding statement.
- 14
- 15
- 16 6

17

18 7 We then focused on trials that included funding information. We extracted the following funding

19

20 8 characteristics reported in the paper:

21

- 22 9 • Whether it reported funding versus no funding,
- 23
- 24
- 25 10 • The type of source(s) of funding (see appendix 3). These included internal funding (when
- 26
- 27 11 it is an academic or hospital affiliation) and external funding, categorized into:
- 28
- 29 12 government, private-for-profit, private not-for-profit with evidence of support by private-
- 30
- 31 13 for-profit that is a health industry, private not-for-profit with evidence of support by
- 32
- 33 14 private-for-profit that is not a health industry, and private not-for-profit with no evidence
- 34
- 35 15 of support by private-for-profit. As needed, we performed an online search to accurately
- 36
- 37 16 assign the type of the funding source. When a funding source was identified as a not-for-
- 38
- 39 17 profit organisation, we searched the organisation's website for any information on
- 40
- 41 18 partnership with or support from a for-profit organisation (see appendix 4 for details),
- 42
- 43
- 44 19 • Amount of funding,
- 45
- 46 20 • Whether the paper reported to be sponsored by a source different than the source of
- 47
- 48 21 funding/support,
- 49
- 50
- 51 22 • Whether information was reported (across the paper) on supplies in trials on
- 52
- 53 23 pharmacological or surgical interventions (i.e., drugs, devices, equipment, samples, or
- 54
- 55
- 56
- 57
- 58
- 59
- 60

1  
2  
3 1           placebos) and whether the supplier is a funding source. We looked for that information in  
4  
5 2  
6           the funding statements, acknowledgement statements and the methods section.  
7  
8 3  
9

10 4   Finally, and in trials that reported being funded, we assessed whether the role of funder was  
11  
12 5   explicitly reported for any funder as involved or not involved in the process of the research  
13  
14 6   study.  
15  
16

## 17 7

### 18 8   **Data analysis**

19 9   We assessed agreement between reviewers of each team for inclusion of RCTs at the full-text  
20  
21 10   screening stage using chance-corrected agreement (kappa statistic). We conducted descriptive  
22  
23 11   analyses of the general characteristics of the RCT, as well as the characteristics of the funding  
24  
25 12   statement. We present summary data for categorical variables as frequencies and percentages and  
26  
27 13   for continuous variables as median and interquartile range (IQR). All calculations used SPSS,  
28  
29 14   version 21.0 for Windows (SPSS INC., Chicago, IL, USA).  
30  
31 15  
32  
33

34 16   Candidate independent variables for multivariable logistic regression analyses to assess the  
35  
36 17   predictors of reported funding and the role of funder included characteristics of the RCT and  
37  
38 18   variables related to Journal policy for reporting funding (i.e., journal requirement for reporting of  
39  
40 19   funding, journal requirement for reporting on the role of funder). For variables related to journal  
41  
42 20   policy for reporting funding information, we used unpublished data we had collected in mid  
43  
44 21   2014 for another cross-sectional survey.[44]  
45  
46 22  
47  
48  
49  
50

### 51 23   **Development of the guidance**

52  
53  
54  
55  
56  
57  
58  
59  
60

1  
2  
3 1 We used the following approach for developing the proposed guidance for standardised reporting  
4  
5 2 of funding information. First, our classification of funding sources was based on one we had  
6  
7 3 used in a previous study (governmental, private not-for-profit, and private-for-profit)[45] that we  
8  
9 4 modified after a review of relevant literature[5, 22, 27] and of journals' policies on reporting of  
10  
11 5 funding information (unpublished data from another cross-sectional survey).[44] Second, we  
12  
13 6 refined the classification through an iterative process of discussion and revisions based on  
14  
15 7 funding statements reported in this sample of RCTs, as well as in a sample of systematic  
16  
17 8 reviews.[46] Finally, we used Adobe® Acrobat XI® software to develop a fillable PDF document  
18  
19 9 for use as an instrument for standardised reporting of funding information.  
20  
21  
22  
23  
24  
25  
26

27 11 The process included both in-person and email discussions among the authors of this article and  
28  
29 12 feedback from external experts. The individuals involved have the following profiles: author  
30  
31 13 EAA is a clinical epidemiologist and was an associate journal editor for Health and Quality of  
32  
33 14 Life Outcomes journal; author GG is a clinical epidemiologist and has been a member of  
34  
35 15 editorial boards of 8 journals. The external experts we consulted include Dr. Elie Al-Chaer  
36  
37 16 (health researcher with a law degree and editor-in-chief of International Journal of Women's  
38  
39 17 Health and Dove Press), Dr. Joerg Meerpohl (associate editor of Health and Quality of Life  
40  
41 18 Outcomes journal), and Dr. Peter Tugwell (co-editor of the Journal of Clinical Epidemiology).  
42  
43  
44  
45  
46  
47

## 48 **RESULTS**

49  
50 21 Figure 1 presents the study flow diagram. Agreement proved substantial ( $\kappa=0.78$ ) and near  
51  
52 22 perfect ( $\kappa=0.86$ ) respectively for each of the two teams at the full-text screening stage.  
53  
54  
55  
56  
57  
58  
59  
60

## 1 **Characteristics of the randomised controlled trial**

2 The first authors of most trials (90%) had affiliations in high-income countries and almost half  
3 (49%) assessed pharmacological interventions (table 1). About half the trials (54%) were multi-  
4 center, and had two as the median number of sites. Most trials (94%) reported on conflicts of  
5 interest and 54% disclosed presence of conflicts of interest. Almost all (178, 89%) included a  
6 funding statement.

7

For peer review only

1 **Table 1:** General characteristics of the included randomised controlled trials (N=200)

|                                                                                                       | Overall<br>n (%) \$ |
|-------------------------------------------------------------------------------------------------------|---------------------|
| Number of trial authors; median (IQR)                                                                 | 9 (6 – 14) *        |
| Paper is the first full-text report of the trial findings                                             | 171 (86%)           |
| Classification of the income level of the country in which the first author's institution is located: |                     |
| <i>High-income</i>                                                                                    | 179 (90%)           |
| <i>Upper middle-income</i>                                                                            | 15 (8%)             |
| <i>Lower middle-income</i>                                                                            | 4 (2%)              |
| <i>Low-income</i>                                                                                     | 2 (1%)              |
| Type of intervention                                                                                  |                     |
| <i>Pharmacological</i>                                                                                | 97 (49%)            |
| <i>Surgical/invasive procedure</i>                                                                    | 42 (21%)            |
| <i>Non-invasive procedure</i>                                                                         | 11 (6%)             |
| <i>Lifestyle intervention</i>                                                                         | 15 (8%)             |
| <i>Screening/diagnostic intervention</i>                                                              | 9 (5%)              |
| <i>Psycho-therapeutic intervention</i>                                                                | 4 (2%)              |
| <i>Rehabilitation</i>                                                                                 | 6 (3%)              |
| <i>Other</i>                                                                                          | 16 (8%)             |
| Type of control                                                                                       |                     |
| <i>Active control (as opposed to non-active)</i>                                                      | 82 (41%)            |

|                                                              |                |
|--------------------------------------------------------------|----------------|
| Number of trial sites; median (IQR)                          | 2 (1 – 17)     |
| Number of randomised participants; median (IQR)              | 160 (60 – 485) |
| Level of risk of bias associated with allocation concealment |                |
| <i>High risk</i>                                             | 4 (2%)         |
| <i>Low risk</i>                                              | 59 (30%)       |
| <i>Unclear</i>                                               | 137 (69%)      |
| Reporting of conflicts of interest                           |                |
| <i>Not reported</i>                                          | 12 (6%)        |
| <i>Reported with no conflicts of interest disclosed</i>      | 80 (40%)       |
| <i>Reported with conflicts of interest disclosed</i>         | 108 (54%)      |
| Inclusion of a funding statement                             |                |
| <i>Included (as opposed to not included)</i>                 | 178 (89%)      |

- 1  
2  
3  
4  
5  
6  
7  
8  
9  
10  
11  
12  
13  
14  
15  
16  
17  
18  
19  
20  
21  
22  
23  
24  
25  
26  
27  
28  
29  
30  
31  
32  
33  
34  
35  
36  
37  
38  
39  
40  
41  
42  
43  
44  
45  
46  
47  
48  
49  
50  
51  
52  
53  
54  
55  
56  
57  
58  
59  
60
- 1  
2 \$ For continuous variables, numbers refer to median (IQR); indicated in the relevant row.  
3 \* The number of trial authors per trial ranged between 1 and 91.

## 1 **Characteristics of the reported funding**

2 Table 2 presents the characteristics of the reported funding of the 178 trials with a funding  
3 statement, of which 171 (96%) reported being funded. The median number (IQR) of funding  
4 sources for each funded trial was 1 (1-3), with a range of 1 to 12 sources per trial. The top most  
5 frequent sources of funding were governmental (58%) and private-for-profit (40%). Of the 54  
6 funding contribution statements in which the source was identified as being a not-for-profit  
7 organisation, we found evidence of support of those organisations from private-for-profit  
8 entity(ies) in 29 (54%), of which 26 (48%) did not disclose this support in the study report.  
9 Twenty-one trials (12%) reported funding from private-for-profit in addition to another source.  
10 Two trials reported the amount of funding received. Of the 139 RCTs assessing pharmacological  
11 or surgical interventions, 29 (21%) reported information on the supplier of the medication or  
12 device.

13



1 **Table 2:** Characteristics of the funding statements included in the randomised controlled trials  
 2 (N=178 trials)

|                                                                                                            | Overall<br>n (%) |
|------------------------------------------------------------------------------------------------------------|------------------|
| Funding statement reported being:                                                                          |                  |
| <i>Funded (as opposed to not funded)</i>                                                                   | 171 (96%)        |
| Source(s) of funding (when reported as funded; N=171) \$                                                   |                  |
| <i>Internally funded</i>                                                                                   | 26 (15%)         |
| <i>Externally funded by:</i>                                                                               |                  |
| <i>Government</i>                                                                                          | 99 (58%)         |
| <i>Private-for-profit</i>                                                                                  | 68 (40%)         |
| <i>Private not-for-profit with evidence of support by private-for-profit that is a health industry</i>     | 14 (8%)          |
| <i>Private not-for-profit with evidence of support by private-for-profit that is not a health industry</i> | 15 (9%)          |
| <i>Private not-for-profit with no evidence of support by private-for-profit</i>                            | 25 (15%)         |
| Statement included amount of funding received                                                              | 2 (1%)           |
| Paper reported to be sponsored by a source different than the source of funding/support                    | 2 (1%)           |
| Paper reported information on supplies (i.e., drugs, devices, equipment, samples, or placebos) *           |                  |

|                                                            |           |
|------------------------------------------------------------|-----------|
| <i>Yes, supplied by manufacturer same as funder</i>        | 12 (9%)   |
| <i>Yes, supplied by manufacturer different than funder</i> | 17 (12%)  |
| <i>Not reported</i>                                        | 110 (79%) |

\$ More than one type could apply for trials reporting more than one source of funding.

\* Calculated using the number of trials on pharmacological interventions and surgical/invasive procedures (N=139).

## 1     **The reported roles of funders**

2     Table 3 presents the reported roles of funders in the 171 trials that reported being funded. Eighty-  
3     five trials (50%) indicated the role of funders and provided descriptions of 22 different roles. The  
4     most frequent roles indicated in these 85 trials were participation in the design of the study  
5     (42%), data collection (27%), data analysis, interpretation, or management (41%), manuscript  
6     preparation (32%), decision to submit the manuscript (15%) and conduct of the study (15%).  
7

1 **Table 3:** Reporting on the roles of funders in the randomised controlled trials that reported being  
 2 funded (N=171)

|                                                           | Reported role as:     |                   | Did not report role |
|-----------------------------------------------------------|-----------------------|-------------------|---------------------|
|                                                           | Not involved<br>n (%) | Involved<br>n (%) |                     |
| Any role of the below                                     | 41 (24%)              | 44 (26%)          | 86 (50%)            |
| Protocol/design of the study                              | 41 (24%)              | 30 (18%)          | 100 (58%)           |
| Data collection                                           | 31 (18%)              | 16 (9%)           | 124 (73%)           |
| Verifying data accuracy/ fact checking                    | 0 (0%)                | 3 (2%)            | 168 (98%)           |
| Outcome adjudication                                      | 0 (0%)                | 1 (1%)            | 170 (99%)           |
| Data analysis/ interpretation/ management                 | 40 (23%)              | 31 (19%)          | 100 (58%)           |
| Funded a medical writer                                   | 1 (1%)                | 19 (11%)          | 151 (88%)           |
| Preparation of the manuscript                             | 34 (20%)              | 20 (12%)          | 117 (68%)           |
| Review of the manuscript                                  | 17 (10%)              | 7 (4%)            | 147 (86%)           |
| Approval of the manuscript                                | 17 (10%)              | 8 (5%)            | 146 (85%)           |
| Decision to submit the manuscript                         | 18 (10%)              | 6 (4%)            | 147 (86%)           |
| Appointed an independent data and safety monitoring board | 0 (0%)                | 1 (1%)            | 170 (99%)           |
| Auditing of study conduct                                 | 0 (0%)                | 3 (2%)            | 168 (98%)           |
| Management                                                | 0 (0%)                | 3 (2%)            | 168 (98%)           |
| Team assembly                                             | 0 (0%)                | 2 (1%)            | 169 (99%)           |
| Conduct of study                                          | 13 (8%)               | 12 (7%)           | 146 (85%)           |

|                               |        |        |           |
|-------------------------------|--------|--------|-----------|
| Generated randomisation list  | 0 (0%) | 3 (2%) | 168 (98%) |
| Enrollment of participants    | 0 (0%) | 1 (1%) | 170 (99%) |
| Logistical support            | 0 (0%) | 3 (2%) | 168 (98%) |
| Holding study data            | 0 (0%) | 1 (1%) | 170 (99%) |
| Study oversight               | 0 (0%) | 2 (1%) | 169 (99%) |
| Steering committee            | 0 (0%) | 1 (1%) | 170 (99%) |
| Measurement of study variable | 0 (0%) | 5 (3%) | 166 (97%) |

1

2

1  
2  
3 **1 Results of the regression analyses**  
4

5  
6 2 Appendix 5 presents the details of the multivariable logistic regression analyses. Reporting being  
7  
8 3 funded was positively associated with two variables (table 4), based on data from all included  
9  
10 4 trials (n=200). Explicit reporting on the role of funder was positively associated with three  
11  
12 5 variables (table 4), based on data from trials reporting being funded (n=171).  
13  
14  
15  
16  
17  
18  
19  
20  
21  
22  
23  
24  
25  
26  
27  
28  
29  
30  
31  
32  
33  
34  
35  
36  
37  
38  
39  
40  
41  
42  
43  
44  
45  
46  
47  
48  
49  
50  
51  
52  
53  
54  
55  
56  
57  
58  
59  
60

For peer review only

1 **Table 4:** Results of the multivariable regression analysis

| Dependent variables                                      | Independent variables                                                                                                | Adjusted OR<br>(95% CI) | p-value |
|----------------------------------------------------------|----------------------------------------------------------------------------------------------------------------------|-------------------------|---------|
| ‘Reporting being funded’ model<br>(N=200)                | Journal impact factor                                                                                                | 1.44<br>(1.09 – 1.90)   | 0.011   |
|                                                          | Affiliation with an institution from a high-income country (reference category being middle or low-income countries) | 0.09<br>(0.02 – 0.37)   | 0.001   |
| ‘Explicit reporting on the role of funder’ model (N=171) | Journal impact factor                                                                                                | 1.07<br>(1.04 – 1.10)   | <0.0001 |
|                                                          | Journal requirement for reporting on the role of funder                                                              | 3.76<br>(1.64 – 8.62)   | 0.002   |
|                                                          | Funding from private-for-profit source(s) (reference category being all other types of funding sources)              | 5.7<br>(2.37 – 13.85)   | <0.0001 |

2

## 1 Proposed guidance

2 The proposed guidance provides suggestions for both funding information and the reporting  
3 process. Box 1 lists the funding information that relates to the phases of the research study for  
4 which the funding was received, the funding sources and the involvement of the funders in the  
5 process of the research study.  
6

### Box 1: Suggestions for what funding information to report

#### Funding sources (and Grant ID if applicable)

- All types of funding sources, including the following with specifications:
  - Internal funding (specifying institution)
  - Government(s) (specifying granting agency, level of government)
  - Inter-government (two or more government agencies such as the European Union)
  - Private-for-profit (listing companies/entities)
  - Private not-for-profit (listing organisations/philanthropies)
- Research phases for which funding was received: planning, conduct and/or reporting of the research study under consideration. When funding relates to provision of supplies, the appropriate answer is ‘conduct’.
- Type of funding received including monetary support, provision of supplies, etc.
- Value of monetary support and value of other supports.
- Whether the funding provided by any of the funding sources is supported by an entity other than/external to the funding source.

#### Involvement (role) of funding sources

- Involvement (role) of each funder in the process of the research study, including:
  - Study planning and conduct: design and protocol drafting, study management, participant recruitment, data collection, data management, data analysis, quality control.
  - Study reporting (manuscript): preparation, review, approval, decision to submit.
  - Authorship: authors employed by the funder.



1  
2  
3 1  
4  
5  
6 2 As for the process of reporting funding information, we suggest that the corresponding author  
7  
8 3 plays the role of the guarantor of this information (given his/her primary responsibility of  
9  
10 4 communicating with both the journal and the readers) and take responsibility for:

- 5 • Collecting funding information and filling a standardised form,
- 6 • Sending the form to all co-authors for approval and verification of accuracy and  
7 completeness of the information,
- 8 • Submitting the up-to-date form at the time of submission of the manuscript for  
9 consideration for publication,
- 10 • Updating and re-submitting the form at the time of acceptance of the manuscript for final  
11 publication.

12  
13 Appendix 6 provides a fillable PDF document for use as an instrument for standardised reporting  
14 of funding information.

## 15 16 **DISCUSSION**

### 17 **Summary of findings**

18 The objective of this study was to describe the characteristics of the funding statements in reports  
19 of clinical trials. About nine in ten trial reports included a funding statement and 96% of those  
20 statements indicated that funding existed. The latter statements specified the source, amount, and  
21 role of funders in 100%, 1%, and 50% of cases respectively. The most commonly reported  
22 sources of funding were government and private-for-profit sources. Of all funding contribution  
23 statements in which the source was identified as being a not-for-profit organisation, about half

1 related to not-for-profit organisations for which we found evidence of support by private-for-  
2 profit entity(ies). Only three of those statements disclosed the support by the private-for profit-  
3 entities. For trials of pharmacological or surgical interventions, only a fifth reported information  
4 on the supplier of the medication or device. We identified descriptions of a total of 22 different  
5 roles for the funders. Trials most frequently reported on roles related to the design of the study,  
6 data collection, data analysis, and manuscript preparation. We also propose a guidance and  
7 instrument for standardised reporting of funding information.

8

### 9 **Reporting of funding**

10 The high percentage of trials that reported being funded may be explained by the fact that  
11 conducting an RCT typically requires a large number of resources.[47-49] Also, we found a  
12 positive association between reporting being funded and affiliation with an institution from a  
13 high-income country. This may reflect better opportunities for, and higher ability of, institutions  
14 from high-income countries to obtain funding.

15

16 Explicit reporting on the role of funder was associated with journal requirement for reporting on  
17 the role of funder. This might explain the relatively low percentage of trials that reported on the  
18 roles of funders given that only 31% of clinical journals require authors to state the role of funder  
19 (unpublished data from another cross-sectional survey [44]). Explicit reporting on the role of  
20 funder was positively associated with trial funding from private-for-profit sources. This may be  
21 due to the adherence of the industry to higher standards of reporting. Indeed, several studies  
22 found that industry-funded trials had higher quality scores as compared to trials funded by other  
23 sources.[24, 50-53]

1  
2  
3 1  
4  
5  
6 2 Both reporting being funded and explicit reporting on the role of funder were associated with  
7  
8 3 higher journal impact factor. This is consistent with our previous findings that better reporting of  
9  
10 4 authors' conflicts of interest is associated with higher journal impact factor for both systematic  
11  
12 5 reviews and trials published in Core Clinical Journals.[46, 54]  
13  
14  
15 6

16  
17 7 We found that half of not-for-profit organisations included in funding contribution statements  
18  
19 8 were supported by private-for-profit entity(ies). This is probably an underestimate due to lack of  
20  
21 9 reporting of such support by authors. This also suggests that these types of relationships are  
22  
23 10 prevalent. Indeed, one recent study found that 96 national health organisations accepted money  
24  
25 11 from the Coca-Cola Company, PepsiCo, or both,[55] with a number of these organisations  
26  
27 12 known to fund research (e.g., Juvenile Diabetes Research Foundation). This is very concerning  
28  
29 13 given that the appearance of support by a not-for-profit may portray confidence in the study  
30  
31 14 findings, in spite of the fact that the indirect for-profit support may have biased those findings.  
32  
33 15 Indeed, while we explored whether private not-for-profit organizations were supported by  
34  
35 16 private-for-profit entity(ies), this may also apply to other types of funding sources.  
36  
37  
38  
39  
40  
41  
42  
43

#### 44 **Strengths and limitations**

45  
46 19 This is the first cross-sectional survey of a large and representative sample of clinical RCTs to  
47  
48 20 describe the characteristics of the funding statements in detail. Our proposed guidance and  
49  
50 21 instrument for standardised reporting of funding information may serve researchers from  
51  
52 22 different fields of health. Moreover, they may be used for other types of research studies and  
53  
54  
55  
56  
57  
58  
59  
60

1 manuscripts and not only trials (e.g., systematic reviews). In addition, we used systematic and  
2 transparent methods for screening and data collection.

3  
4 As our study focused on clinical trials, our findings may not apply similarly to other fields, for  
5 example, health policy and systems research. While we did not conduct a formal and extensive  
6 validation of the guidance (and instrument), we believe that it has both face and content validity  
7 given that we based it on a thorough review of the related literature, on the cross-sectional survey  
8 of trials, and we revised it based on feedback from journal editors and a lawyer.

### 9 10 **Comparison to similar studies**

11 We identified 22 studies on the reporting of funding information in clinical trials (see appendix  
12 1) [5, 19-39]. While all 22 studies focused on trials published in specific clinical areas or  
13 journals, our study assessed a wide sample of clinical trials published in any of the Core Clinical  
14 Journals. None of the 22 studies looked at whether the amount of funding was reported. In fact,  
15 we found that two trials in our sample reported amount. Two out of the 22 studies assessed  
16 reporting of provision of supplies in trials published between 1987 and 1994.[34, 39] To our  
17 knowledge, our study is the first one to survey a recent sample of trials for reporting of amount  
18 of funding and information on supplies.

19  
20 Only four out of the 22 studies assessed reporting on the roles of funders.[20, 22, 28, 36].  
21 Whereas these studies assessed this in industry-funded or partially industry-funded trials, we  
22 assessed this across all types of funders. For example, we found that 44% of trials funded solely  
23 by governmental sources reported on the role of funder. Example statements from those that

1 reported involvement of the government as a funder include: “appointed an independent data and  
2 safety monitoring board”, “had input into the study design and data interpretation” and  
3 “reviewed and approved the report”.

4  
5 Our previous study on clinical systematic reviews found that a third of systematic reviews did  
6 not report on funding or reported no funding in comparison to 15% of trials in this study.[46]  
7 When the included systematic reviews reported being funded, the most commonly reported  
8 sources of funding were internal funding and government (52% and 67% respectively). While  
9 only 2% of clinical systematic reviews reported funding from private-for-profit sources, we  
10 found that 40% of clinical trials reported such funding. Moreover, trials were twice more likely  
11 than systematic reviews to report on not-for-profit as their funding source (32% and 16%  
12 respectively). While half of funded trials reported on the role of the funder, a quarter of funded  
13 systematic reviews did so.

14  
15 In comparison to the Standard Protocol Items: Recommendations for Interventional Trials  
16 (SPIRIT)[56, 57] and the CONSORT checklist sections on funding,[10, 11] our guidance  
17 provides more detailed and specific recommendations for the reporting of funding information  
18 and includes detailed definitions and examples of types of funders. It also includes a clear  
19 classification of roles in which funders may be involved in the process of the trial. Whereas the  
20 International Committee of Medical Journal Editors (ICMJE) conflict of interest disclosure form  
21 includes a section for the reporting of “financial support”, the questions and options that follow  
22 imply types of financial conflicts of interest for each individual author rather than the study’s  
23 funding.[58]

1

## 2 **Implications for practice**

3 Our proposed guidance may help with clearer and more detailed reporting of the characteristics  
4 of funding in trials. This may in turn help readers and systematic reviewers better assess the  
5 significance of the funding and how it might affect the credibility of findings.[8, 59] Specifically,  
6 we recommend that trial authors explicitly report more details on the funders, whether they are  
7 supported by for-profit organisations, the provision of drugs and equipment,[11] and on the role  
8 of funders.[20, 22, 28, 36] We suggest that authors do not to report funding information (i.e.,  
9 grants received for the conduct of the study) in both the funding section and the conflict of  
10 interest section of the manuscript, but only in the former one. Also, our findings have  
11 implications for reporting statements (such as SPIRIT and CONSORT) for improving the  
12 reporting of funding information.

13

## 14 **Implications for future research**

15 Future research should further explore the issue of funding of not-for profit organisations by for-  
16 profit organisations and the role of the latter in the planning, conduct and reporting of research  
17 studies. Future research could also assess for the accuracy and completeness of reporting of trial  
18 funding and roles of funders. Moreover, it would be interesting to explore reporting of funding in  
19 primary studies of other research fields (e.g., health policy and systems), especially that roles of  
20 funders may vary from those described in clinical trials. Finally, our proposed guidance and  
21 instrument for the standardised reporting of funding information would benefit from formal and  
22 extensive validation.

23

1  
2  
3 1  
4  
5  
6 2 **FIGURES**  
7  
8 3 **Figure 1:** Study flow diagram  
9  
10 4  
11  
12  
13 5 **SUPPLEMENTARY FILE**  
14  
15 6 **Appendix 1:** Comparative chart including 23 related surveys of reporting of funding information  
16  
17 in trials  
18  
19  
20 8 **Appendix 2:** Search strategy  
21  
22 9 **Appendix 3:** Types of funding sources  
23  
24  
25 10 **Appendix 4:** Process followed to verify whether a private not-for-profit organisation was  
26  
27 supported by a private-for-profit entity  
28  
29 12 **Appendix 5:** Details of the multivariable logistic regression analyses  
30  
31  
32 13 **Appendix 6:** Instrument for reporting of funding information  
33  
34 14  
35  
36  
37  
38  
39  
40  
41  
42  
43  
44  
45  
46  
47  
48  
49  
50  
51  
52  
53  
54  
55  
56  
57  
58  
59  
60

## 1 ACKNOWLEDGEMENTS

2 We thank Dr. Elie Al-Chaer, Dr. Joerg Meerpohl and Dr. Peter Tugwell for their expert opinion  
3 and constructive feedback on the proposed guidance and instrument for standardised reporting of  
4 funding information. We also thank the reviewers whose suggestions helped improve this  
5 manuscript.

## 7 CONTRIBUTIONS

8 MBH, GG, and EAA conceived and designed the study. MBH coordinated the study throughout.  
9 EAA had full access to all of the data in the study and takes responsibility for the integrity of the  
10 data and the accuracy of the data analysis. MBH, NJ, and MK screened papers for inclusion.  
11 MBH, NJ, EAA-J, DJH, EAA-J, LCL, MZH, MA-G, and SA extracted the data. MBH and EAA  
12 analysed and interpreted the data. MBH wrote the first draft of the manuscript with EAA. MBH  
13 and EAA developed the first draft of the fillable PDF document. All authors critically revised the  
14 manuscript and approved the final version. The lead author EAA affirms that this manuscript is  
15 an honest, accurate and transparent account of the study being reported; that no important aspects  
16 of the study have been omitted; and that any discrepancies from the study as planned have been  
17 explained.

## 19 COMPETING INTERESTS

20 All authors have completed the ICMJE uniform disclosure form at  
21 [http://www.icmje.org/coi\\_disclosure.pdf](http://www.icmje.org/coi_disclosure.pdf) and declare no conflicts of interest.

## 23 FUNDING



1  
2  
3 1 This project was funded by the American University of Beirut Faculty of Medicine's Medical  
4  
5 2 Practice Plan (MPP) funds. The funder had no role in the design and conduct of the study;  
6  
7  
8 3 collection, management, analysis, and interpretation of the data; preparation, review, or approval  
9  
10 4 of the manuscript; and decision to submit the manuscript for publication. The authors and their  
11  
12 5 contributions to the manuscript are independent from the funder.  
13  
14  
15  
16  
17  
18

#### 19 20 7 **ETHICAL APPROVAL**

21 8 Not required.  
22  
23  
24  
25

#### 26 10 **DATA SHARING**

27 11 Data available upon request.  
28  
29  
30  
31  
32  
33  
34  
35  
36  
37  
38  
39  
40  
41  
42  
43  
44  
45  
46  
47  
48  
49  
50  
51  
52  
53  
54  
55  
56  
57  
58  
59  
60

## REFERENCES

1. Amiri, A.R., K. Kanesalingam, S. Cro, et al., Does source of funding and conflict of interest influence the outcome and quality of spinal research? *Spine J*, 2014;14(2):308-14.
2. Bartels, R.H., H. Delye and J. Boogaarts, Financial disclosures of authors involved in spine research: an underestimated source of bias. *Eur Spine J*, 2012;21(7):1229-33.
3. Crocetti, M.T., D.D. Amin and R. Scherer, Assessment of risk of bias among pediatric randomized controlled trials. *Pediatrics*, 2010;126(2):298-305.
4. Lundh, A., J. Lexchin, B. Mintzes, et al., Industry sponsorship and research outcome. *Cochrane Database Syst Rev*, 2017;2:MR000033.
5. Mugambi, M.N., A. Musekiwa, M. Lombard, et al., Association between funding source, methodological quality and research outcomes in randomized controlled trials of synbiotics, probiotics and prebiotics added to infant formula: a systematic review. *BMC Med Res Methodol*, 2013;13:137.
6. Riaz, H., S. Raza, M.S. Khan, et al., Impact of Funding Source on Clinical Trial Results Including Cardiovascular Outcome Trials. *Am J Cardiol*, 2015;116(12):1944-7.
7. Kasenda, B., E. von Elm, J.J. You, et al., Agreements between Industry and Academia on Publication Rights: A Retrospective Study of Protocols and Publications of Randomized Clinical Trials. *PLoS Med*, 2016;13(6):e1002046.
8. Kesselheim, A.S., C.T. Robertson, J.A. Myers, et al., A randomized study of how physicians interpret research funding disclosures. *N Engl J Med*, 2012;367(12):1119-27.
9. Coultas, D., Ethical considerations in the interpretation and communication of clinical trial results. *Proc Am Thorac Soc*, 2007;4(2):194-8; discussion 198-9.
10. Schulz, K.F., D.G. Altman, D. Moher, et al., CONSORT 2010 Statement: Updated guidelines for reporting parallel group randomised trials. *J Clin Epidemiol*, 2010;63(8):834-40.
11. Moher, D., S. Hopewell, K.F. Schulz, et al., CONSORT 2010 Explanation and Elaboration: Updated guidelines for reporting parallel group randomised trials. *J Clin Epidemiol*, 2010;63(8):e1-37.
12. The Independent. A recent study that said Diet Coke can help you lose weight was quietly funded by Coca-Cola, Sunday 17 January 2016. Available from: <http://www.independent.co.uk/news/science/study-that-said-diet-fizzy-drinks-can-help-weight-loss-was-quietly-funded-by-coca-cola-and-pepsi-a6817686.html>.
13. The New York Times. Coca-Cola Funds Scientists Who Shift Blame for Obesity Away From Bad Diets, August 9, 2015. Available from: [http://well.blogs.nytimes.com/2015/08/09/coca-cola-funds-scientists-who-shift-blame-for-obesity-away-from-bad-diets/?\\_r=0](http://well.blogs.nytimes.com/2015/08/09/coca-cola-funds-scientists-who-shift-blame-for-obesity-away-from-bad-diets/?_r=0).
14. Rogers, P.J., P.S. Hogenkamp, C. de Graaf, et al., Does low-energy sweetener consumption affect energy intake and body weight? A systematic review, including meta-analyses, of the evidence from human and animal studies. *Int J Obes (Lond)*, 2016;40(3):381-94.
15. International Life Sciences Institute. Mission & Operating Principles. 2016; Available from: <http://ilsi.org/about/mission/>.

16. The Sugar Association, I. Research. [accessed on November 15, 2016]; Available from: <https://www.sugar.org/research/>.
17. Kearns, C.E., L.A. Schmidt and S.A. Glantz, Sugar Industry and Coronary Heart Disease Research: A Historical Analysis of Internal Industry Documents. *JAMA Intern Med*, 2016;176(11):1680-1685.
18. Kmietowicz, Z., Coca-Cola funded group set up to promote "energy balance" is disbanded. *BMJ*, 2015;351:h6590.
19. Als-Nielsen, B., W. Chen, C. Gluud, et al., Association of funding and conclusions in randomized drug trials: a reflection of treatment effect or adverse events? *JAMA*, 2003;290(7):921-8.
20. Bero, L., F. Oostvogel, P. Bacchetti, et al., Factors associated with findings of published trials of drug-drug comparisons: why some statins appear more efficacious than others. *PLoS Med*, 2007;4(6):e184.
21. Bhandari, M., J.W. Busse, D. Jackowski, et al., Association between industry funding and statistically significant pro-industry findings in medical and surgical randomized trials. *CMAJ*, 2004;170(4):477-80.
22. Bridoux, V., G. Moutel, L. Schwarz, et al., Disclosure of funding sources and conflicts of interest in phase III surgical trials: survey of ten general surgery journals. *World J Surg*, 2014;38(10):2487-93.
23. Clifford, T.J., N.J. Barrowman and D. Moher, Funding source, trial outcome and reporting quality: are they related? Results of a pilot study. *BMC Health Serv Res*, 2002;2(1):18.
24. Djulbegovic, B., M. Lacey, A. Cantor, et al., The uncertainty principle and industry-sponsored research. *Lancet*, 2000;356(9230):635-8.
25. Etter, J.F., M. Burri and J. Stapleton, The impact of pharmaceutical company funding on results of randomized trials of nicotine replacement therapy for smoking cessation: a meta-analysis. *Addiction*, 2007;102(5):815-22.
26. Hodgson, R., R. Allen, E. Broderick, et al., Funding source and the quality of reports of chronic wounds trials: 2004 to 2011. *Trials*, 2014;15:19.
27. Khan, N.A., J.I. Lombeida, M. Singh, et al., Association of industry funding with the outcome and quality of randomized controlled trials of drug therapy for rheumatoid arthritis. *Arthritis Rheum*, 2012;64(7):2059-67.
28. Lundh, A., L.T. Krogsboll and P.C. Gotzsche, Sponsors' participation in conduct and reporting of industry trials: a descriptive study. *Trials*, 2012;13:146.
29. Momeni, A., A. Becker, H. Bannasch, et al., Association between research sponsorship and study outcome in plastic surgery literature. *Ann Plast Surg*, 2009;63(6):661-4.
30. Montgomery, J.H., M. Byerly, T. Carmody, et al., An analysis of the effect of funding source in randomized clinical trials of second generation antipsychotics for the treatment of schizophrenia. *Control Clin Trials*, 2004;25(6):598-612.
31. Peppercorn, J., E. Blood, E. Winer, et al., Association between pharmaceutical involvement and outcomes in breast cancer clinical trials. *Cancer*, 2007;109(7):1239-46.
32. Perlis, C.S., M. Harwood and R.H. Perlis, Extent and impact of industry sponsorship conflicts of interest in dermatology research. *J Am Acad Dermatol*, 2005;52(6):967-71.

- 1  
2  
3  
4  
5  
6  
7  
8  
9  
10  
11  
12  
13  
14  
15  
16  
17  
18  
19  
20  
21  
22  
23  
24  
25  
26  
27  
28  
29  
30  
31  
32  
33  
34  
35  
36  
37  
38  
39  
40  
41  
42  
43  
44  
45  
46  
47  
48  
49  
50  
51  
52  
53  
54  
55  
56  
57  
58  
59  
60
33. Ridker, P.M. and J. Torres, Reported outcomes in major cardiovascular clinical trials funded by for-profit and not-for-profit organizations: 2000-2005. *JAMA*, 2006;295(19):2270-4.
  34. Rochon, P.A., J.H. Gurwitz, R.W. Simms, et al., A study of manufacturer-supported trials of nonsteroidal anti-inflammatory drugs in the treatment of arthritis. *Arch Intern Med*, 1994;154(2):157-63.
  35. Shah, R.V., T.J. Albert, V. Bruegel-Sanchez, et al., Industry support and correlation to study outcome for papers published in Spine. *Spine (Phila Pa 1976)*, 2005;30(9):1099-104; discussion 1105.
  36. Tuech, J.J., G. Moutel, P. Pessaux, et al., Disclosure of competing financial interests and role of sponsors in phase III cancer trials. *Eur J Cancer*, 2005;41(15):2237-40.
  37. Tungaraza, T. and R. Poole, Influence of drug company authorship and sponsorship on drug trial outcomes. *Br J Psychiatry*, 2007;191:82-3.
  38. Voineskos, S.H., C.J. Coroneos, N.I. Ziolkowski, et al., A Systematic Review of Surgical Randomized Controlled Trials: Part 2. Funding Source, Conflict of Interest, and Sample Size in Plastic Surgery. *Plast Reconstr Surg*, 2016;137(2):453e-461e.
  39. Yaphe, J., R. Edman, B. Knishkowsy, et al., The association between funding by commercial interests and study outcome in randomized controlled drug trials. *Fam Pract*, 2001;18(6):565-8.
  40. U.S. National Library of Medicine. Abridged Index Medicus (AIM or "Core Clinical") Journal Titles. 2016 [accessed on May 02, 2017]; Available from: <https://www.nlm.nih.gov/bsd/aim.html>.
  41. Moher, D., A. Liberati, J. Tetzlaff, et al., Preferred reporting items for systematic reviews and meta-analyses: the PRISMA Statement. *Open Med*, 2009;3(3):e123-30.
  42. Harris, P.A., R. Taylor, R. Thielke, et al., Research electronic data capture (REDCap) - A metadata-driven methodology and workflow process for providing translational research informatics support. *J Biomed Inform.*, 2009, Apr;42(2):377-81.
  43. Higgins, J.P. and S. Green, *Cochrane Handbook for Systematic Reviews of Interventions. Table 8.5.d: Criteria for judging risk of bias in the 'Risk of bias' assessment tool*. 2011: The Cochrane Collaboration. Available from <http://handbook.cochrane.org>.
  44. Shawwa, K., R. Kallas, S. Koujanian, et al., Requirements of Clinical Journals for Authors' Disclosure of Financial and Non-Financial Conflicts of Interest: A Cross Sectional Study. *PLoS One*, 2016;11(3):e0152301.
  45. Akl, E.A., A. Carrasco-Labra, R. Brignardello-Petersen, et al., Reporting, handling and assessing the risk of bias associated with missing participant data in systematic reviews: a methodological survey. *BMJ Open*, 2015;5(9):e009368.
  46. Hakoum, M.B., S. Anouti, M. Al-Gibbawi, et al., Reporting of financial and non-financial conflicts of interest by authors of systematic reviews: a methodological survey. *BMJ Open*, 2016;6(8):e011997.
  47. Glass, H.E. and K. Hollander, Managing clinical grant costs. *Contemp Clin Trials*, 2009;30(3):221-6.
  48. Idoko, O.T., S. Kochhar, T.E. Agbenyega, et al., Impact, challenges, and future projections of vaccine trials in Africa. *Am J Trop Med Hyg*, 2013;88(3):414-9.

- 1  
2  
3  
4 49. Ravinetto, R., K. De Nys, M. Boelaert, et al., Sponsorship in non-commercial clinical  
5 trials: definitions, challenges and the role of Good Clinical Practices guidelines. *BMC Int*  
6 *Health Hum Rights*, 2015;15:34.  
7  
8 50. Pengel, L.H., L. Barcena and P.J. Morris, The quality of reporting of randomized  
9 controlled trials in solid organ transplantation. *Transpl Int*, 2009;22(4):377-84.  
10  
11 51. Rios, L.P., A. Oduyungbo, M.O. Moitri, et al., Quality of reporting of randomized  
12 controlled trials in general endocrinology literature. *J Clin Endocrinol Metab*,  
13 2008;93(10):3810-6.  
14  
15 52. Yuen, S.Y. and J.E. Pope, Learning from past mistakes: assessing trial quality, power and  
16 eligibility in non-renal systemic lupus erythematosus randomized controlled trials.  
17 *Rheumatology (Oxford)*, 2008;47(9):1367-72.  
18  
19 53. Lexchin, J., L.A. Bero, B. Djulbegovic, et al., Pharmaceutical industry sponsorship and  
20 research outcome and quality: systematic review. *BMJ*, 2003;326(7400):1167-70.  
21  
22 54. Hakoum, M.B., N. Jouni, E.A. Abou-Jaoude, et al., Authors of Clinical Trials Reported  
23 Individual and Financial Conflicts of Interest More Frequently than Institutional and non-  
24 financial Ones: a Methodological Survey. *J Clin Epidemiol*, 2017.  
25  
26 55. Aaron, D.G. and M.B. Siegel, Sponsorship of National Health Organizations by Two Major  
27 Soda Companies. *Am J Prev Med*, 2016.  
28  
29 56. Chan, A.W., J.M. Tetzlaff, D.G. Altman, et al., SPIRIT 2013 statement: defining standard  
30 protocol items for clinical trials. *Ann Intern Med*, 2013;158(3):200-7.  
31  
32 57. Chan, A.W., J.M. Tetzlaff, P.C. Gotzsche, et al., SPIRIT 2013 explanation and elaboration:  
33 guidance for protocols of clinical trials. *BMJ*, 2013;346:e7586.  
34  
35 58. International Committee of Medical Journal Editors. Conflict of Interest Disclosure  
36 Forms. [accessed on May 03, 2017]; Available from: [http://www.icmje.org/about-  
37 icmje/fags/conflict-of-interest-disclosure-forms/](http://www.icmje.org/about-icmje/fags/conflict-of-interest-disclosure-forms/).  
38  
39 59. Elia, N., E. von Elm, A. Chatagner, et al., How do authors of systematic reviews deal with  
40 research malpractice and misconduct in original studies? A cross-sectional analysis of  
41 systematic reviews and survey of their authors. *BMJ Open*, 2016;6(3):e010442.  
42  
43  
44  
45  
46  
47  
48  
49  
50  
51  
52  
53  
54  
55  
56  
57  
58  
59  
60



Figure 1: Study flow diagram

130x165mm (300 x 300 DPI)

## APPENDICES

**Appendix 1:** Comparative chart including 23 related surveys of reporting of funding information in trials

| Survey                | Eligibility criteria                                                            | Number of trials | Year of trial publication | Characteristics of funding statement assessed in the survey                                                                               | Main findings                                                                                                                                                                              |
|-----------------------|---------------------------------------------------------------------------------|------------------|---------------------------|-------------------------------------------------------------------------------------------------------------------------------------------|--------------------------------------------------------------------------------------------------------------------------------------------------------------------------------------------|
| Als-Nielsen 2003 [19] | RCTs included in eligible meta-analyses in Cochrane reviews                     | 370              | 1971 - 2000               | - Source of funding                                                                                                                       | Funding was not reported in 29%. 39% were funded by for-profit organisations.                                                                                                              |
| Etter 2007 [25]       | RCTs on nicotine replacement therapy in Cochrane review                         | 90               | 1979 - 2003               | - Source of funding                                                                                                                       | 54% received pharmaceutical company support. 46% showed no evidence of pharmaceutical company support.                                                                                     |
| Mugambi 2013 [5]      | RCTs on infant formula supplementation of symbiotics, probiotics, or prebiotics | 67               | 1980 - 2012               | - Source of funding                                                                                                                       | 60% were funded by food industry. 24% did not specify their source of funding.                                                                                                             |
| Rochon 1994 [34]      | Manufacturer-associated RCTs of NSAIDs listed in MEDLINE                        | 52               | 1987 - 1990               | - Grant support<br>- Pharmaceutical authorship<br>- Provision of supplies<br>- Published in a pharmaceutical sponsored journal supplement | 19% reported grant support. 36.5% reported pharmaceutical authorship. 13.5% reported that manufacturer supplied drug. 31% were published in a pharmaceutical sponsored journal supplement. |
| Momeni 2008 [29]      | Trials published in 4 major plastic surgery journals                            | 346              | 1990 - 2005               | - Source of funding                                                                                                                       | 20% reported on financial support, of which 60% were supported by industrial sponsorship.                                                                                                  |



|                                                                                                                                                                                                                                                                                           |                                                                         |                                                                |                  |                                                    |                                                                                                                                                                    |                                                                                                                                                                 |
|-------------------------------------------------------------------------------------------------------------------------------------------------------------------------------------------------------------------------------------------------------------------------------------------|-------------------------------------------------------------------------|----------------------------------------------------------------|------------------|----------------------------------------------------|--------------------------------------------------------------------------------------------------------------------------------------------------------------------|-----------------------------------------------------------------------------------------------------------------------------------------------------------------|
| 1<br>2<br>3<br>4<br>5<br>6<br>7<br>8<br>9<br>10<br>11<br>12<br>13<br>14<br>15<br>16<br>17<br>18<br>19<br>20<br>21<br>22<br>23<br>24<br>25<br>26<br>27<br>28<br>29<br>30<br>31<br>32<br>33<br>34<br>35<br>36<br>37<br>38<br>39<br>40<br>41<br>42<br>43<br>44<br>45<br>46<br>47<br>48<br>49 | Yaphe<br>2001 [39]                                                      | RCTs of drugs or food products published in 5 medical journals | 314              | 1992 - 1994                                        | - Source of funding<br>- Pharmaceutical authorship<br>- Provision of supplies                                                                                      | 68% received pharmaceutical industry support.<br>33% received support as manpower (authorship or statistical help).<br>21% received support as supply of drugs. |
| Peppercorn<br>2007 [31]                                                                                                                                                                                                                                                                   | Breast cancer clinical trials published in 10 medical journals          | 140                                                            | 1993, 1998, 2003 | - Source of funding<br>- Pharmaceutical authorship | 48% were categorised as pharmaceutical studies.<br>26% reported pharmaceutical industry authorship.                                                                |                                                                                                                                                                 |
| Bero<br>2007 [20]                                                                                                                                                                                                                                                                         | Reports of RCTs comparing statin drugs                                  | 192                                                            | 1995 - 2005      | - Source of funding<br>- Role of funder            | 39% had no disclosure or no funding.<br>49% disclosed funding from industry, of which 21% disclosed the role of the sponsor.                                       |                                                                                                                                                                 |
| Djulgovic<br>2000 [24]                                                                                                                                                                                                                                                                    | RCTs for multiple myeloma                                               | 130                                                            | 1996 - 1998      | - Source of funding                                | 26% reported funding solely or in part by commercial organisations.                                                                                                |                                                                                                                                                                 |
| Clifford<br>2002 [23]                                                                                                                                                                                                                                                                     | RCTs published in 5 high impact factor general medical journals         | 100                                                            | 1999 - 2000      | - Source of funding                                | 94% were funded, of which 66% were funded in whole or in part by industry.<br>6% did not disclose their source of funding.                                         |                                                                                                                                                                 |
| Bhandari<br>2004 [21]                                                                                                                                                                                                                                                                     | RCTs published in 8 surgical and 5 medical journals                     | 332                                                            | 1999 - 2001      | - Source of funding                                | 44% had no reported funding.<br>37% reported funding by industry.                                                                                                  |                                                                                                                                                                 |
| Tuech<br>2005 [36]                                                                                                                                                                                                                                                                        | Phase III cancer RCTs published in 12 journals                          | 655                                                            | 1999 - 2003      | - Source of funding<br>- Role of funder            | 35% were industry-sponsored, of which 18% reported the role of the study sponsor.<br>21% did not disclose funding and only 1 trial disclosed no financial support. |                                                                                                                                                                 |
| Shah<br>2005 [35]                                                                                                                                                                                                                                                                         | Articles published in the Spine journal                                 | 34                                                             | 2000 - 2003      | - Source of funding                                | 23% were industry funded.                                                                                                                                          |                                                                                                                                                                 |
| Tungaraza<br>2007 [37]                                                                                                                                                                                                                                                                    | Original papers on psychiatric drug treatment published in two journals | 132                                                            | 2000 - 2004      | - Source of funding<br>- Pharmaceutical authorship | 85% were industry-funded.<br>40% were industry-authored studies.                                                                                                   |                                                                                                                                                                 |



|                               |                                                                                                                                                  |     |                            |                                         |                                                                                                                                                                |
|-------------------------------|--------------------------------------------------------------------------------------------------------------------------------------------------|-----|----------------------------|-----------------------------------------|----------------------------------------------------------------------------------------------------------------------------------------------------------------|
| Ridker<br>2006 [33]           | Cardiovascular medicine<br>RCTs published in 3<br>medical journals                                                                               | 349 | 2000 - 2005                | - Source of funding                     | 31% were financed by not-for-profit<br>organisations, 44% by for-profit<br>manufacturers, and 19% by both.<br>6% noted no source of funding.                   |
| Voineskos<br>2016 [38]        | Surgical RCTs                                                                                                                                    | 173 | 2000 - 2013                | - Source of funding                     | 58% did not acknowledge a source of<br>funding.<br>14% reported funding from for-profit<br>sources.<br>10% explicitly reported 'no funding<br>received'.       |
| Montogom<br>-ery<br>2004 [30] | RCTs on second generation<br>antipsychotics for the<br>management of<br>schizophrenia                                                            | 86  | 2002                       | - Source of funding                     | 84% were industry-funded.<br>16% were non-industry-funded.                                                                                                     |
| Perlis<br>2005 [32]           | RCTs published in one of<br>the four dermatology<br>journals with the highest<br>science citation impact<br>factor scores and total<br>citations | 179 | 2002                       | - Source of funding                     | 57% reported receiving at least some<br>industry support.<br>26% had no information about funding.                                                             |
| Khan<br>2012 [27]             | RCTs of drug therapy for<br>rheumatoid arthritis                                                                                                 | 103 | 2002 – 2003<br>2006 - 2007 | - Source of funding                     | 62% had complete or partial industry<br>funding.<br>19% had an unspecified funding source.                                                                     |
| Hodgson<br>2014 [26]          | RCTs in chronic wound care                                                                                                                       | 167 | 2004 - 2011                | - Source of funding                     | 35% were reported as having been<br>commercially funded.<br>26% either did not report the source of<br>funding or the status of funding source<br>was unclear. |
| Bridoux<br>2014 [22]          | Surgical trials published in<br>10 surgery journals with<br>impact factor >2                                                                     | 657 | 2005 - 2010                | - Source of funding<br>- Role of funder | 47% disclosed funding.<br>Of those, 39% reported funding from<br>industry or mixed funding, of which 35%<br>reported the role of study sponsor.                |

|                 |                                                                                                       |     |             |                                                                                                                                                    |                                                                                                                                                                                                                                                                                                                                                                                                                                                                                                        |
|-----------------|-------------------------------------------------------------------------------------------------------|-----|-------------|----------------------------------------------------------------------------------------------------------------------------------------------------|--------------------------------------------------------------------------------------------------------------------------------------------------------------------------------------------------------------------------------------------------------------------------------------------------------------------------------------------------------------------------------------------------------------------------------------------------------------------------------------------------------|
| Lundh 2012 [28] | RCTs published in The Lancet and fully funded by a drug or device company                             | 69  | 2008 - 2009 | - Role of funder                                                                                                                                   | <p>Sponsor had a role in:</p> <ul style="list-style-type: none"> <li>Review and verification of information (71%)</li> <li>Entry of data into the study database (75%)</li> <li>Data storage (64%)</li> <li>Data analysis (58%)</li> <li>Coordinating writing of the manuscript (35%)</li> <li>Medical writing assistance (54%)</li> <li>Protocol writing (99%)</li> <li>Co-authorship (81%)</li> <li>Publication of results through co-authorship or approval/review of the paper (93%)</li> </ul>    |
| Current survey  | RCTs published in any of the 119 Core Clinical Journals, not restricted to a specific clinical domain | 200 | 2015        | <ul style="list-style-type: none"> <li>- Source of funding</li> <li>- Amount</li> <li>- Provision of supplies</li> <li>- Role of funder</li> </ul> | <p>89% included a funding statement, of which 96% reported being funded.</p> <p>Of the funded trials (N=171):</p> <ul style="list-style-type: none"> <li>- 100% specified the source;</li> <li>- 40% received funding from private-for-profit sources;</li> <li>- 1% reported the amount of funding;</li> <li>- 21% of pharmacological/surgical trials (N=139) reported information on supplies.</li> <li>- 50% reported on the roles of funders (26% as involved and 24% as not involved).</li> </ul> |

RCT: randomised controlled trial

References of studies included in Table 1  
(in order of appearance in the manuscript)

5. Mugambi, M.N., A. Musekiwa, M. Lombard, et al., Association between funding source, methodological quality and research outcomes in randomized controlled trials of synbiotics, probiotics and prebiotics added to infant formula: a systematic review. *BMC Med Res Methodol*, 2013;13:137.
19. Als-Nielsen, B., W. Chen, C. Gluud, et al., Association of funding and conclusions in randomized drug trials: a reflection of treatment effect or adverse events? *JAMA*, 2003;290(7):921-8.
20. Bero, L., F. Oostvogel, P. Bacchetti, et al., Factors associated with findings of published trials of drug-drug comparisons: why some statins appear more efficacious than others. *PLoS Med*, 2007;4(6):e184.
21. Bhandari, M., J.W. Busse, D. Jackowski, et al., Association between industry funding and statistically significant pro-industry findings in medical and surgical randomized trials. *CMAJ*, 2004;170(4):477-80.
22. Bridoux, V., G. Moutel, L. Schwarz, et al., Disclosure of funding sources and conflicts of interest in phase III surgical trials: survey of ten general surgery journals. *World J Surg*, 2014;38(10):2487-93.
23. Clifford, T.J., N.J. Barrowman and D. Moher, Funding source, trial outcome and reporting quality: are they related? Results of a pilot study. *BMC Health Serv Res*, 2002;2(1):18.
24. Djulbegovic, B., M. Lacey, A. Cantor, et al., The uncertainty principle and industry-sponsored research. *Lancet*, 2000;356(9230):635-8.
25. Etter, J.F., M. Burri and J. Stapleton, The impact of pharmaceutical company funding on results of randomized trials of nicotine replacement therapy for smoking cessation: a meta-analysis. *Addiction*, 2007;102(5):815-22.
26. Hodgson, R., R. Allen, E. Broderick, et al., Funding source and the quality of reports of chronic wounds trials: 2004 to 2011. *Trials*, 2014;15:19.
27. Khan, N.A., J.I. Lombeida, M. Singh, et al., Association of industry funding with the outcome and quality of randomized controlled trials of drug therapy for rheumatoid arthritis. *Arthritis Rheum*, 2012;64(7):2059-67.
28. Lundh, A., L.T. Krogsboll and P.C. Gotzsche, Sponsors' participation in conduct and reporting of industry trials: a descriptive study. *Trials*, 2012;13:146.
29. Momeni, A., A. Becker, H. Bannasch, et al., Association between research sponsorship and study outcome in plastic surgery literature. *Ann Plast Surg*, 2009;63(6):661-4.
30. Montgomery, J.H., M. Byerly, T. Carmody, et al., An analysis of the effect of funding source in randomized clinical trials of second generation antipsychotics for the treatment of schizophrenia. *Control Clin Trials*, 2004;25(6):598-612.
31. Peppercorn, J., E. Blood, E. Winer, et al., Association between pharmaceutical involvement and outcomes in breast cancer clinical trials. *Cancer*, 2007;109(7):1239-46.
32. Perlis, C.S., M. Harwood and R.H. Perlis, Extent and impact of industry sponsorship conflicts of interest in dermatology research. *J Am Acad Dermatol*, 2005;52(6):967-71.
33. Ridker, P.M. and J. Torres, Reported outcomes in major cardiovascular clinical trials funded by for-profit and not-for-profit organizations: 2000-2005. *JAMA*, 2006;295(19):2270-4.
34. Rochon, P.A., J.H. Gurwitz, R.W. Simms, et al., A study of manufacturer-supported trials of nonsteroidal anti-inflammatory drugs in the treatment of arthritis. *Arch Intern Med*, 1994;154(2):157-63.
35. Shah, R.V., T.J. Albert, V. Bruegel-Sanchez, et al., Industry support and correlation to study outcome for papers published in *Spine*. *Spine (Phila Pa 1976)*, 2005;30(9):1099-104; discussion 1105.
36. Tuech, J.J., G. Moutel, P. Pessaix, et al., Disclosure of competing financial interests and role of sponsors in phase III cancer trials. *Eur J Cancer*, 2005;41(15):2237-40.
37. Tungaraza, T. and R. Poole, Influence of drug company authorship and sponsorship on drug trial outcomes. *Br J Psychiatry*, 2007;191:82-3.
38. Voineskos, S.H., C.J. Coroneos, N.I. Ziolkowski, et al., A Systematic Review of Surgical Randomized Controlled Trials: Part 2. Funding Source, Conflict of Interest, and Sample Size in Plastic Surgery. *Plast Reconstr Surg*, 2016;137(2):453e-461e.
39. Yaphe, J., R. Edman, B. Knishkowsky, et al., The association between funding by commercial interests and study outcome in randomized controlled drug trials. *Fam Pract*, 2001;18(6):565-8.

## Appendix 2: Search strategy

We searched Ovid Medline (In-Process & Other Non-Indexed Citations and Ovid MEDLINE) in September 2015 using the MEDLINE (Ovid interface) search strategy for randomized controlled trials (Filter obtained from the Cochrane Handbook, under the Cochrane Highly Sensitive Search Strategy for identifying randomized trials in MEDLINE: sensitivity- and precision-maximizing version (2008 revision):

1. randomized controlled trial.pt.
2. controlled clinical trial.pt.
3. randomized.ab.
4. placebo.ab.
5. clinical trials as topic.sh.
6. randomly.ab.
7. trial.ti.
8. 1 or 2 or 3 or 4 or 5 or 6 or 7
9. exp animals/ not humans.sh.
10. 8 not 9
11. limit 10 to ("core clinical journals (aim)" and yr="2015")

**Appendix 3: Types of funding sources**

|                                                                                                               |                                                                                                                                                                                                   |
|---------------------------------------------------------------------------------------------------------------|---------------------------------------------------------------------------------------------------------------------------------------------------------------------------------------------------|
| Internal funding                                                                                              | author is the “Chair of –”; intramural fund; provided by institution, university, hospital affiliation, academic affiliation                                                                      |
| External funding:                                                                                             |                                                                                                                                                                                                   |
| 1. <i>Government</i>                                                                                          | national, regional (province, county), or governmental body, organisation, or association                                                                                                         |
| 2. <i>Private-for-profit</i>                                                                                  | drug/device industry or private company                                                                                                                                                           |
| 3. <i>Private not-for-profit with evidence of support by private-for-profit that is a health industry</i>     | foundation or organisation that receives funding from a drug industry, as stated in information provided online                                                                                   |
| 4. <i>Private not-for-profit with evidence of support by private-for-profit that is not a health industry</i> | foundation or philanthropy that was founded by billionaires or that receives funding from a private industry that is not known to produce drugs/devices, as stated in information provided online |
| 5. <i>Private not-for-profit with no evidence of support by private-for-profit</i>                            | foundation or organisation that is not known to receive funding from any governmental or private company, as stated in information provided online                                                |

1  
2  
3 **Appendix 4:** Process followed to verify whether a private not-for-profit organisation was  
4 supported by a private-for-profit entity  
5  
6  
7  
8  
9

- 10 1- We searched for the official website of the funding source reported in the trial using an  
11 online search engine (e.g., Google).  
12  
13 2- We searched for relevant information in the following sections: About Us, Who we are,  
14 Supporters, Donors, Partners, Partnerships, Sponsors, Financial support, Financial  
15 statements, Finances, Financials.  
16  
17 3- If no relevant information was obtained from the official website, we searched the  
18 organisation on Wikipedia, LinkedIn profiles and Facebook.  
19  
20  
21  
22  
23  
24  
25  
26  
27  
28

29 PS: We did not contact funding sources to obtain any additional information.  
30  
31  
32  
33  
34  
35  
36  
37  
38  
39  
40  
41  
42  
43  
44  
45  
46  
47  
48  
49  
50  
51  
52  
53  
54  
55  
56  
57  
58  
59  
60

1  
2  
3 **Appendix 5:** Details of the multivariable logistic regression analyses  
4  
5  
6

7  
8 Analysis 1  
9

10 Dependent variable (categorical)  
11

- 12 • Reporting being funded (funded vs. not funded/not reported); all trials (N=200)  
13  
14  
15

16  
17 Independent variables  
18  
19

- 20 1. Type of intervention (categorical, pharmacologic vs. non-pharmacologic)  
21
- 22 2. Paper is the first one reporting on the findings of the trial (categorical, yes vs. no)  
23
- 24 3. Conflict of interest disclosure (COI present vs. COI absent/not reported)  
25 *We did not include this variable in the final model since we found it to be highly*  
26 *correlated with the dependent variable.*  
27  
28
- 29 4. Level of risk of bias associated with allocation concealment (categorical, low risk vs.  
30 high risk/unclear)  
31  
32
- 33 5. Journal impact factor (continuous)  
34
- 35 6. Number of trial sites (continuous)  
36  
37
- 38 7. Classification of the country of the institution to which the first author is affiliated  
39  
40 (categorical, high-income vs. middle or low-income)  
41  
42
- 43 8. Journal requirement for reporting on the role of funder (categorical, yes vs. no)  
44  
45  
46  
47  
48  
49  
50  
51  
52  
53  
54  
55  
56  
57  
58  
59  
60

1  
2  
3 Analysis 2  
4

5 Dependent variable (categorical)  
6  
7

- 8 • Explicit reporting of the role of funder (reported vs. not reported); trials that reported  
9 being funded (N=171)  
10  
11  
12  
13

14  
15 Independent variables  
16

17 In addition to the eight independent variables listed in analysis 1, we also included the following  
18 variable:  
19  
20

- 21 9. Funding from private-for-profit source(s) as opposed to all other types of funding sources  
22 (categorical, yes vs. no)  
23  
24  
25  
26  
27  
28  
29  
30  
31  
32  
33  
34  
35  
36  
37  
38  
39  
40  
41  
42  
43  
44  
45  
46  
47  
48  
49  
50  
51  
52  
53  
54  
55  
56  
57  
58  
59  
60



## Results

|                                                                                                                                                       | Analysis 1              |         | Analysis 2              |           |
|-------------------------------------------------------------------------------------------------------------------------------------------------------|-------------------------|---------|-------------------------|-----------|
|                                                                                                                                                       | Adjusted OR<br>(95% CI) | p-value | Adjusted OR<br>(95% CI) | p-value   |
| Type of intervention<br>(pharmacologic as opposed to<br>non-pharmacologic)                                                                            | 0.84<br>(0.29 – 2.54)   | 0.758   | 1.60<br>(0.71 – 3.63)   | 0.260     |
| Paper is the first one reporting on<br>the findings of the trial                                                                                      | 1.24<br>(0.21 – 7.30)   | 0.815   | 2.67<br>(0.94 – 7.58)   | 0.065     |
| Level of risk of bias associated<br>with allocation concealment<br>(low risk as opposed to high<br>risk/unclear)                                      | 0.62<br>(0.16 – 2.40)   | 0.489   | 0.47<br>(0.19 – 1.16)   | 0.100     |
| Journal impact factor                                                                                                                                 | 1.44<br>(1.09 – 1.90)   | 0.011 * | 1.07<br>(1.04 – 1.10)   | <0.0001 * |
| Number of trial sites                                                                                                                                 | 1.25<br>(0.97 – 1.62)   | 0.082   | 0.99<br>(0.99 – 1.00)   | 0.299     |
| Classification of the country of<br>the institution to which the first<br>author is affiliated<br>(high-income as opposed to<br>middle or low-income) | 0.09<br>(0.02 – 0.37)   | 0.001 * | 2.85<br>(0.44 – 18.23)  | 0.270     |
| Journal requirement for reporting<br>on the role of funder                                                                                            | 1.04<br>(0.36 – 3.03)   | 0.947   | 3.76<br>(1.64 – 8.62)   | 0.002 *   |
| Funding from private-for-profit<br>source(s)<br>(as opposed to all other types of<br>funding sources)                                                 | N/A                     | N/A     | 5.7<br>(2.37 – 13.85)   | <0.0001 * |

OR = odds ratio; CI = confidence interval

\* p-values for statistically significant associations.

1 **Appendix 6:** Instrument for reporting of funding information  
2

3 Please see the PDF supplementary file (does not include tracked changes).  
4  
5  
6  
7  
8  
9  
10  
11  
12  
13  
14  
15  
16  
17  
18  
19  
20  
21  
22  
23  
24  
25  
26  
27  
28  
29  
30  
31  
32  
33  
34  
35  
36  
37  
38  
39  
40  
41  
42  
43  
44  
45  
46  
47  
48  
49  
50  
51  
52  
53  
54  
55  
56  
57  
58  
59  
60

For peer review only

1  
2  
3  
4  
5  
6  
7  
8  
9  
10  
11  
12  
13  
14  
15  
16  
17  
18  
19  
20  
21  
22  
23  
24  
25  
26  
27  
28  
29  
30  
31  
32  
33  
34  
35  
36  
37  
38  
39  
40  
41  
42  
43  
44  
45  
46  
47  
48  
49

**Appendix 6: Instrument for reporting of funding information**

When filling this form, please report on all funding received to plan, conduct and/or report the research study under consideration, including the protocol, first and subsequent reports.

**SECTION 1  
STUDY INFORMATION**

1. Name of corresponding author

First name:

Last name:

2. Manuscript title

**SECTION 2  
FUNDING RECEIVED**

3. Did you receive any funding (monetary support, provision of supplies, assistance in manuscript writing, etc.) for the research study?

Yes

No

**If yes, please answer the questions below and complete the form. Please see instructions provided in Section 7.**

### SECTION 3 FUNDING SOURCES

4. Please list the study's funding sources. For each source listed, please provide additional details and if applicable, report information on provision of supplies related to the research study.

| Funding sources<br>(include Grant ID if applicable) | Type of funder | Research phase(s) for which<br>funding was received: |         |           | Monetary support<br>(indicate value) | Provision of supplies<br>(if applicable) |                |
|-----------------------------------------------------|----------------|------------------------------------------------------|---------|-----------|--------------------------------------|------------------------------------------|----------------|
|                                                     |                | Planning                                             | Conduct | Reporting |                                      | Type of supplies                         | Monetary value |
|                                                     |                |                                                      |         |           |                                      |                                          |                |
|                                                     |                |                                                      |         |           |                                      |                                          |                |
|                                                     |                |                                                      |         |           |                                      |                                          |                |
|                                                     |                |                                                      |         |           |                                      |                                          |                |
|                                                     |                |                                                      |         |           |                                      |                                          |                |

5. Is the funding provided by any of the funding sources listed above supported by an entity other than/external to the listed source? (Please see examples provided in Section 7.)

Yes

No

Not known to the author

6. If Yes or No, please use the space below to provide additional details.

1  
2  
3  
4  
5  
6  
7  
8  
9  
10  
11  
12  
13  
14  
15  
16  
17  
18  
19  
20  
21  
22  
23  
24  
25  
26  
27  
28  
29  
30  
31  
32  
33  
34  
35  
36  
37  
38  
39  
40  
41  
42  
43  
44  
45  
46  
47  
48  
49

**SECTION 4  
INVOLVEMENT OF FUNDING SOURCES**

7. Please indicate the involvement of the funder(s) in the following roles by checking the respective cells.

| Funding source | Study planning and conduct |                         |                 |                 |               |                 | Study reporting (manuscript) |        |          |                    | Authorship                                     |
|----------------|----------------------------|-------------------------|-----------------|-----------------|---------------|-----------------|------------------------------|--------|----------|--------------------|------------------------------------------------|
|                | Design                     | Participant recruitment | Data collection | Data management | Data analysis | Quality control | Preparation                  | Review | Approval | Decision to submit | Are any of the authors employed by the funder? |
|                |                            |                         |                 |                 |               |                 |                              |        |          |                    |                                                |
|                |                            |                         |                 |                 |               |                 |                              |        |          |                    |                                                |
|                |                            |                         |                 |                 |               |                 |                              |        |          |                    |                                                |
|                |                            |                         |                 |                 |               |                 |                              |        |          |                    |                                                |
|                |                            |                         |                 |                 |               |                 |                              |        |          |                    |                                                |
|                |                            |                         |                 |                 |               |                 |                              |        |          |                    |                                                |

8. If the funder was involved in any roles other than those listed above, please indicate them in the space below.

**SECTION 5  
ADDITIONAL INFORMATION**

9. Please use the space below to provide any additional information related to the study's funding sources.

1  
2  
3  
4 **SECTION 6**  
5 **GUARANTOR CERTIFICATION**  
6

7 This person, \_\_\_\_\_, acts as the guarantor of the study, certifies that the information in this form is accurate and  
8 complete, and confirms the following:  
9

10 The co-authors approved and verified the form for accuracy and completeness of the information.

11 The form was updated at the time of submission of the manuscript for consideration for publication.

12 The form was updated at the time of acceptance of the manuscript for final publication.

13  
14  
15  
16  
17  
18  
19 Date of last update (dd-mm-yyyy):  
20  
21  
22  
23  
24  
25  
26  
27  
28  
29  
30  
31  
32  
33  
34  
35  
36  
37  
38  
39  
40  
41  
42  
43  
44  
45

## SECTION 7 INSTRUCTIONS

### Section 3

#### Question 4 addresses characteristics of the funding sources. Explanations on type of funder:

- **Internal funder:** refers to a funder that is the author's own institution or employer. This term typically refers to an academic institution. Conceivably, it could refer to a non-academic institution (e.g., pharmaceutical company) when it funded a study conducted by its employees. *Example statements: internal research account, support through being the "Chair of–", intramural fund, funding provided by the academic institution, university, or hospital.*
- **External funder:** refers to a funder different than the author's own institution or employer. Types of external funders include:
  - **Government:** refers to governmental bodies, agencies, organizations, or associations at the national, regional (e.g., provincial), or local (e.g., municipal) levels. *Examples: National Institutes of Health (USA), the Danish Agency for Science Technology and Innovation.*
  - **Inter-governmental:** refers to two or more government agencies. *Examples: European Union.*
  - **Private-for-profit:** refers to an entity that operates to make profit. *Examples: drug or device industry, private company, insurance company, private laboratory.*
  - **Private not-for-profit:** refers to an organization that is not conducted primarily to make profit. *Examples: Doctors Without Borders, Bill and Melinda Gates Foundation.*

#### Questions 5 and 6 address whether the funding provided by any of the funding sources listed in Section 3 is supported by an entity other than/external to the listed source.

- **Example:** a private not-for-profit organization that is a partner of, or receives support (typically in the form of funding), from at least one entity other than itself.
  - *"The Epilepsy Foundation's mission is funded through the generous gifts of individual donors and many partner organizations, including corporations and corporate foundations, member organizations, and both state and federal government agencies, including the Centers for Disease Control and Prevention."*
  - *"The Pfizer Foundation is a charitable organization established by Pfizer Inc."*

## Section 4

### Questions 7 and 8 address the involvement of funding sources.

Funders may play a role in one or more steps of the research study. It is important to indicate whether a funder is involved in each of the following steps:

- **Study planning and conduct**
  - Study design and drafting the protocol
  - Study management
  - Participant recruitment
  - Data collection
  - Data management (e.g., verifying accuracy, storing data)
  - Data analysis
  - Quality control (e.g., oversight, auditing)
- **Study reporting (manuscript)**
  - Preparation: relates to drafting the manuscript or medical writing assistance (providing a medical writer or covering the writer's fees)
  - Review of the manuscript
  - Approval of the final version of the manuscript
  - Decision to submit the manuscript for publication (e.g., to what journal)
- **Authorship**
  - This relates to at least one of the employees of the funder being an author on the manuscript.
- **Other roles**

These include roles that are not captured by the steps listed above.
