# Supplementary material for: Characteristics of funding of clinical trials: cross-sectional survey and proposed guidance
Source: PubMed Central journal article supplement — BMJ Open. 2017 Oct 5;7(10):e015997. doi: 10.1136/bmjopen-2017-015997 (PMC5639984; doi:10.1136/bmjopen-2017-015997), 2017-10-05
Supplement: bmjopen-2017-015997supp001.pdf [file bmjopen-2017-015997supp001.pdf]

## APPENDICES

**Appendix 1:** Comparative chart including 23 related surveys of reporting of funding information in trials

| Survey                | Eligibility criteria                                                            | Number of trials | Year of trial publication | Characteristics of funding statement assessed in the survey                                                                               | Main findings                                                                                                                                                                              |
|-----------------------|---------------------------------------------------------------------------------|------------------|---------------------------|-------------------------------------------------------------------------------------------------------------------------------------------|--------------------------------------------------------------------------------------------------------------------------------------------------------------------------------------------|
| Als-Nielsen 2003 [19] | RCTs included in eligible meta-analyses in Cochrane reviews                     | 370              | 1971 - 2000               | - Source of funding                                                                                                                       | Funding was not reported in 29%. 39% were funded by for-profit organisations.                                                                                                              |
| Etter 2007 [25]       | RCTs on nicotine replacement therapy in Cochrane review                         | 90               | 1979 - 2003               | - Source of funding                                                                                                                       | 54% received pharmaceutical company support. 46% showed no evidence of pharmaceutical company support.                                                                                     |
| Mugambi 2013 [5]      | RCTs on infant formula supplementation of symbiotics, probiotics, or prebiotics | 67               | 1980 - 2012               | - Source of funding                                                                                                                       | 60% were funded by food industry. 24% did not specify their source of funding.                                                                                                             |
| Rochon 1994 [34]      | Manufacturer-associated RCTs of NSAIDs listed in MEDLINE                        | 52               | 1987 - 1990               | - Grant support<br>- Pharmaceutical authorship<br>- Provision of supplies<br>- Published in a pharmaceutical sponsored journal supplement | 19% reported grant support. 36.5% reported pharmaceutical authorship. 13.5% reported that manufacturer supplied drug. 31% were published in a pharmaceutical sponsored journal supplement. |
| Momeni 2008 [29]      | Trials published in 4 major plastic surgery journals                            | 346              | 1990 - 2005               | - Source of funding                                                                                                                       | 20% reported on financial support, of which 60% were supported by industrial sponsorship.                                                                                                  |

|                         |                                                                         |     |                  |                                                                               |                                                                                                                                                                    |
|-------------------------|-------------------------------------------------------------------------|-----|------------------|-------------------------------------------------------------------------------|--------------------------------------------------------------------------------------------------------------------------------------------------------------------|
| Yaphe<br>2001 [39]      | RCTs of drugs or food products published in 5 medical journals          | 314 | 1992 - 1994      | - Source of funding<br>- Pharmaceutical authorship<br>- Provision of supplies | 68% received pharmaceutical industry support.<br>33% received support as manpower (authorship or statistical help).<br>21% received support as supply of drugs.    |
| Peppercorn<br>2007 [31] | Breast cancer clinical trials published in 10 medical journals          | 140 | 1993, 1998, 2003 | - Source of funding<br>- Pharmaceutical authorship                            | 48% were categorised as pharmaceutical studies.<br>26% reported pharmaceutical industry authorship.                                                                |
| Bero<br>2007 [20]       | Reports of RCTs comparing statin drugs                                  | 192 | 1995 - 2005      | - Source of funding<br>- Role of funder                                       | 39% had no disclosure or no funding.<br>49% disclosed funding from industry, of which 21% disclosed the role of the sponsor.                                       |
| Djulgovic<br>2000 [24]  | RCTs for multiple myeloma                                               | 130 | 1996 - 1998      | - Source of funding                                                           | 26% reported funding solely or in part by commercial organisations.                                                                                                |
| Clifford<br>2002 [23]   | RCTs published in 5 high impact factor general medical journals         | 100 | 1999 - 2000      | - Source of funding                                                           | 94% were funded, of which 66% were funded in whole or in part by industry.<br>6% did not disclose their source of funding.                                         |
| Bhandari<br>2004 [21]   | RCTs published in 8 surgical and 5 medical journals                     | 332 | 1999 - 2001      | - Source of funding                                                           | 44% had no reported funding.<br>37% reported funding by industry.                                                                                                  |
| Tuech<br>2005 [36]      | Phase III cancer RCTs published in 12 journals                          | 655 | 1999 - 2003      | - Source of funding<br>- Role of funder                                       | 35% were industry-sponsored, of which 18% reported the role of the study sponsor.<br>21% did not disclose funding and only 1 trial disclosed no financial support. |
| Shah<br>2005 [35]       | Articles published in the Spine journal                                 | 34  | 2000 - 2003      | - Source of funding                                                           | 23% were industry funded.                                                                                                                                          |
| Tungaraza<br>2007 [37]  | Original papers on psychiatric drug treatment published in two journals | 132 | 2000 - 2004      | - Source of funding<br>- Pharmaceutical authorship                            | 85% were industry-funded.<br>40% were industry-authored studies.                                                                                                   |

|                               |                                                                                                                                                  |     |                            |                                         |                                                                                                                                                                |
|-------------------------------|--------------------------------------------------------------------------------------------------------------------------------------------------|-----|----------------------------|-----------------------------------------|----------------------------------------------------------------------------------------------------------------------------------------------------------------|
| Ridker<br>2006 [33]           | Cardiovascular medicine<br>RCTs published in 3<br>medical journals                                                                               | 349 | 2000 - 2005                | - Source of funding                     | 31% were financed by not-for-profit<br>organisations, 44% by for-profit<br>manufacturers, and 19% by both.<br>6% noted no source of funding.                   |
| Voineskos<br>2016 [38]        | Surgical RCTs                                                                                                                                    | 173 | 2000 - 2013                | - Source of funding                     | 58% did not acknowledge a source of<br>funding.<br>14% reported funding from for-profit<br>sources.<br>10% explicitly reported 'no funding<br>received'.       |
| Montomom<br>-ery<br>2004 [30] | RCTs on second generation<br>antipsychotics for the<br>management of<br>schizophrenia                                                            | 86  | 2002                       | - Source of funding                     | 84% were industry-funded.<br>16% were non-industry-funded.                                                                                                     |
| Perlis<br>2005 [32]           | RCTs published in one of<br>the four dermatology<br>journals with the highest<br>science citation impact<br>factor scores and total<br>citations | 179 | 2002                       | - Source of funding                     | 57% reported receiving at least some<br>industry support.<br>26% had no information about funding.                                                             |
| Khan<br>2012 [27]             | RCTs of drug therapy for<br>rheumatoid arthritis                                                                                                 | 103 | 2002 – 2003<br>2006 - 2007 | - Source of funding                     | 62% had complete or partial industry<br>funding.<br>19% had an unspecified funding source.                                                                     |
| Hodgson<br>2014 [26]          | RCTs in chronic wound care                                                                                                                       | 167 | 2004 - 2011                | - Source of funding                     | 35% were reported as having been<br>commercially funded.<br>26% either did not report the source of<br>funding or the status of funding source<br>was unclear. |
| Bridoux<br>2014 [22]          | Surgical trials published in<br>10 surgery journals with<br>impact factor >2                                                                     | 657 | 2005 - 2010                | - Source of funding<br>- Role of funder | 47% disclosed funding.<br>Of those, 39% reported funding from<br>industry or mixed funding, of which 35%<br>reported the role of study sponsor.                |

|                 |                                                                                                       |     |             |                                                                                |                                                                                                                                                                                                                                                                                                                                                                                                                          |
|-----------------|-------------------------------------------------------------------------------------------------------|-----|-------------|--------------------------------------------------------------------------------|--------------------------------------------------------------------------------------------------------------------------------------------------------------------------------------------------------------------------------------------------------------------------------------------------------------------------------------------------------------------------------------------------------------------------|
| Lundh 2012 [28] | RCTs published in The Lancet and fully funded by a drug or device company                             | 69  | 2008 - 2009 | - Role of funder                                                               | Sponsor had a role in:<br>Review and verification of information (71%)<br>Entry of data into the study database (75%)<br>Data storage (64%)<br>Data analysis (58%)<br>Coordinating writing of the manuscript (35%)<br>Medical writing assistance (54%)<br>Protocol writing (99%)<br>Co-authorship (81%)<br>Publication of results through co-authorship or approval/review of the paper (93%)                            |
| Current survey  | RCTs published in any of the 119 Core Clinical Journals, not restricted to a specific clinical domain | 200 | 2015        | - Source of funding<br>- Amount<br>- Provision of supplies<br>- Role of funder | 89% included a funding statement, of which 96% reported being funded.<br><br>Of the funded trials (N=171):<br>- 100% specified the source;<br>- 40% received funding from private-for-profit sources;<br>- 1% reported the amount of funding;<br>- 21% of pharmacological/surgical trials (N=139) reported information on supplies.<br>- 50% reported on the roles of funders (26% as involved and 24% as not involved). |

RCT: randomised controlled trial

References of studies included in Table 1  
(in order of appearance in the manuscript)

5. Mugambi, M.N., A. Musekiwa, M. Lombard, et al., Association between funding source, methodological quality and research outcomes in randomized controlled trials of synbiotics, probiotics and prebiotics added to infant formula: a systematic review. *BMC Med Res Methodol*, 2013;13:137.
19. Als-Nielsen, B., W. Chen, C. Gluud, et al., Association of funding and conclusions in randomized drug trials: a reflection of treatment effect or adverse events? *JAMA*, 2003;290(7):921-8.
20. Bero, L., F. Oostvogel, P. Bacchetti, et al., Factors associated with findings of published trials of drug-drug comparisons: why some statins appear more efficacious than others. *PLoS Med*, 2007;4(6):e184.
21. Bhandari, M., J.W. Busse, D. Jackowski, et al., Association between industry funding and statistically significant pro-industry findings in medical and surgical randomized trials. *CMAJ*, 2004;170(4):477-80.
22. Bridoux, V., G. Moutel, L. Schwarz, et al., Disclosure of funding sources and conflicts of interest in phase III surgical trials: survey of ten general surgery journals. *World J Surg*, 2014;38(10):2487-93.
23. Clifford, T.J., N.J. Barrowman and D. Moher, Funding source, trial outcome and reporting quality: are they related? Results of a pilot study. *BMC Health Serv Res*, 2002;2(1):18.
24. Djulbegovic, B., M. Lacevic, A. Cantor, et al., The uncertainty principle and industry-sponsored research. *Lancet*, 2000;356(9230):635-8.
25. Etter, J.F., M. Burri and J. Stapleton, The impact of pharmaceutical company funding on results of randomized trials of nicotine replacement therapy for smoking cessation: a meta-analysis. *Addiction*, 2007;102(5):815-22.
26. Hodgson, R., R. Allen, E. Broderick, et al., Funding source and the quality of reports of chronic wounds trials: 2004 to 2011. *Trials*, 2014;15:19.
27. Khan, N.A., J.I. Lombeida, M. Singh, et al., Association of industry funding with the outcome and quality of randomized controlled trials of drug therapy for rheumatoid arthritis. *Arthritis Rheum*, 2012;64(7):2059-67.
28. Lundh, A., L.T. Krogsboll and P.C. Gotzsche, Sponsors' participation in conduct and reporting of industry trials: a descriptive study. *Trials*, 2012;13:146.
29. Momeni, A., A. Becker, H. Bannasch, et al., Association between research sponsorship and study outcome in plastic surgery literature. *Ann Plast Surg*, 2009;63(6):661-4.
30. Montgomery, J.H., M. Byerly, T. Carmody, et al., An analysis of the effect of funding source in randomized clinical trials of second generation antipsychotics for the treatment of schizophrenia. *Control Clin Trials*, 2004;25(6):598-612.
31. Peppercorn, J., E. Blood, E. Winer, et al., Association between pharmaceutical involvement and outcomes in breast cancer clinical trials. *Cancer*, 2007;109(7):1239-46.
32. Perlis, C.S., M. Harwood and R.H. Perlis, Extent and impact of industry sponsorship conflicts of interest in dermatology research. *J Am Acad Dermatol*, 2005;52(6):967-71.
33. Ridker, P.M. and J. Torres, Reported outcomes in major cardiovascular clinical trials funded by for-profit and not-for-profit organizations: 2000-2005. *JAMA*, 2006;295(19):2270-4.
34. Rochon, P.A., J.H. Gurwitz, R.W. Simms, et al., A study of manufacturer-supported trials of nonsteroidal anti-inflammatory drugs in the treatment of arthritis. *Arch Intern Med*, 1994;154(2):157-63.
35. Shah, R.V., T.J. Albert, V. Bruegel-Sanchez, et al., Industry support and correlation to study outcome for papers published in *Spine*. *Spine (Phila Pa 1976)*, 2005;30(9):1099-104; discussion 1105.
36. Tuech, J.J., G. Moutel, P. Pessaux, et al., Disclosure of competing financial interests and role of sponsors in phase III cancer trials. *Eur J Cancer*, 2005;41(15):2237-40.
37. Tungaraza, T. and R. Poole, Influence of drug company authorship and sponsorship on drug trial outcomes. *Br J Psychiatry*, 2007;191:82-3.
38. Voineskos, S.H., C.J. Coroneos, N.I. Ziolkowski, et al., A Systematic Review of Surgical Randomized Controlled Trials: Part 2. Funding Source, Conflict of Interest, and Sample Size in Plastic Surgery. *Plast Reconstr Surg*, 2016;137(2):453e-461e.
39. Yaphe, J., R. Edman, B. Knishkowsky, et al., The association between funding by commercial interests and study outcome in randomized controlled drug trials. *Fam Pract*, 2001;18(6):565-8.

## **Appendix 2:** Search strategy

We searched Ovid Medline (In-Process & Other Non-Indexed Citations and Ovid MEDLINE) in September 2015 using the MEDLINE (Ovid interface) search strategy for randomized controlled trials (Filter obtained from the Cochrane Handbook, under the Cochrane Highly Sensitive Search Strategy for identifying randomized trials in MEDLINE: sensitivity- and precision-maximizing version (2008 revision):

1. randomized controlled trial.pt.
2. controlled clinical trial.pt.
3. randomized.ab.
4. placebo.ab.
5. clinical trials as topic.sh.
6. randomly.ab.
7. trial.ti.
8. 1 or 2 or 3 or 4 or 5 or 6 or 7
9. exp animals/ not humans.sh.
10. 8 not 9
11. limit 10 to ("core clinical journals (aim)" and yr="2015")

### Appendix 3: Types of funding sources

|                                                                                                               |                                                                                                                                                                                                   |
|---------------------------------------------------------------------------------------------------------------|---------------------------------------------------------------------------------------------------------------------------------------------------------------------------------------------------|
| Internal funding                                                                                              | author is the “Chair of –”; intramural fund; provided by institution, university, hospital affiliation, academic affiliation                                                                      |
| External funding:                                                                                             |                                                                                                                                                                                                   |
| 1. <i>Government</i>                                                                                          | national, regional (province, county), or governmental body, organisation, or association                                                                                                         |
| 2. <i>Private-for-profit</i>                                                                                  | drug/device industry or private company                                                                                                                                                           |
| 3. <i>Private not-for-profit with evidence of support by private-for-profit that is a health industry</i>     | foundation or organisation that receives funding from a drug industry, as stated in information provided online                                                                                   |
| 4. <i>Private not-for-profit with evidence of support by private-for-profit that is not a health industry</i> | foundation or philanthropy that was founded by billionaires or that receives funding from a private industry that is not known to produce drugs/devices, as stated in information provided online |
| 5. <i>Private not-for-profit with no evidence of support by private-for-profit</i>                            | foundation or organisation that is not known to receive funding from any governmental or private company, as stated in information provided online                                                |

**Appendix 4:** Process followed to verify whether a private not-for-profit organisation was supported by a private-for-profit entity

- 1- We searched for the official website of the funding source reported in the trial using an online search engine (e.g., Google).
- 2- We searched for relevant information in the following sections: About Us, Who we are, Supporters, Donors, Partners, Partnerships, Sponsors, Financial support, Financial statements, Finances, Financials.
- 3- If no relevant information was obtained from the official website, we searched the organisation on Wikipedia, LinkedIn profiles and Facebook.

PS: We did not contact funding sources to obtain any additional information.

## Appendix 5: Details of the multivariable logistic regression analyses

### Analysis 1

#### Dependent variable (categorical)

- Reporting being funded (funded vs. not funded/not reported); all trials (N=200)

#### Independent variables

1. Type of intervention (categorical, pharmacologic vs. non-pharmacologic)
2. Paper is the first one reporting on the findings of the trial (categorical, yes vs. no)
3. Conflict of interest disclosure (COI present vs. COI absent/not reported)  
*We did not include this variable in the final model since we found it to be highly correlated with the dependent variable.*
4. Level of risk of bias associated with allocation concealment (categorical, low risk vs. high risk/unclear)
5. Journal impact factor (continuous)
6. Number of trial sites (continuous)
7. Classification of the country of the institution to which the first author is affiliated (categorical, high-income vs. middle or low-income)
8. Journal requirement for reporting on the role of funder (categorical, yes vs. no)

## Analysis 2

### Dependent variable (categorical)

- Explicit reporting of the role of funder (reported vs. not reported); trials that reported being funded (N=171)

### Independent variables

In addition to the eight independent variables listed in analysis 1, we also included the following variable:

9. Funding from private-for-profit source(s) as opposed to all other types of funding sources (categorical, yes vs. no)

## Results

|                                                                                                                                                       | Analysis 1              |         | Analysis 2              |           |
|-------------------------------------------------------------------------------------------------------------------------------------------------------|-------------------------|---------|-------------------------|-----------|
|                                                                                                                                                       | Adjusted OR<br>(95% CI) | p-value | Adjusted OR<br>(95% CI) | p-value   |
| Type of intervention<br>(pharmacologic as opposed to<br>non-pharmacologic)                                                                            | 0.84<br>(0.29 – 2.54)   | 0.758   | 1.60<br>(0.71 – 3.63)   | 0.260     |
| Paper is the first one reporting on<br>the findings of the trial                                                                                      | 1.24<br>(0.21 – 7.30)   | 0.815   | 2.67<br>(0.94 – 7.58)   | 0.065     |
| Level of risk of bias associated<br>with allocation concealment<br>(low risk as opposed to high<br>risk/unclear)                                      | 0.62<br>(0.16 – 2.40)   | 0.489   | 0.47<br>(0.19 – 1.16)   | 0.100     |
| Journal impact factor                                                                                                                                 | 1.44<br>(1.09 – 1.90)   | 0.011 * | 1.07<br>(1.04 – 1.10)   | <0.0001 * |
| Number of trial sites                                                                                                                                 | 1.25<br>(0.97 – 1.62)   | 0.082   | 0.99<br>(0.99 – 1.00)   | 0.299     |
| Classification of the country of<br>the institution to which the first<br>author is affiliated<br>(high-income as opposed to<br>middle or low-income) | 0.09<br>(0.02 – 0.37)   | 0.001 * | 2.85<br>(0.44 – 18.23)  | 0.270     |
| Journal requirement for reporting<br>on the role of funder                                                                                            | 1.04<br>(0.36 – 3.03)   | 0.947   | 3.76<br>(1.64 – 8.62)   | 0.002 *   |
| Funding from private-for-profit<br>source(s)<br>(as opposed to all other types of<br>funding sources)                                                 | N/A                     | N/A     | 5.7<br>(2.37 – 13.85)   | <0.0001 * |

OR = odds ratio; CI = confidence interval

\* p-values for statistically significant associations.

**Appendix 6:** Instrument for reporting of funding information

Please see the PDF supplementary file (does not include tracked changes).
